# Supplementary material for: Detecting change in comparison to peers in NHS prescribing data: a novel application of cumulative sum methodology
Source: Springer Nature journal article supplement (doi:10.1186/s12911-018-0642-6), 2018-07-09

# Detecting change in prescribing data using CUSUM

March 13, 2017

## 1 Appendix A - Code

### 1.1 Get data from Open Prescribing API

```
In [1]: import json
import urllib2
import numpy as np
import matplotlib.pyplot as plt
import datetime

def get_percentiles_for(measure, location):
    percentiles = []
    dates = []
    calc_value = []
    #for CCGs
    if len(location) == 3:
        # Create a request to the API
        url = ('https://openprescribing.net/'
              'api/1.0/measure_by_ccg/?format=json&measure=' + measure)
        request = urllib2.Request(url)

        # Pretend to be a real web browser
        request.add_header(
            'User-Agent',
            'Mozilla/5.0 (X11; U; Linux i686) '
            'Gecko/20071127 Firefox/2.0.0.11')
        opener = urllib2.build_opener()
        response = opener.open(request).read()

        # Convert the JSON string into a python dictionary
        data = json.loads(response)

        # Extract the data about the CCG we're interested in
        for datum in data['measures'][0]['data']:
            if datum['pct_id'] == location:
                percentiles.append(datum['percentile'])
                dates.append(datum['date'])
```

```

        calc_value.append(datum['calc_value'])
#for practices:
else:
    # Create a request to the API
    url = ('https://openprescribing.net/'
          'api/1.0/measure_by_practice/?format=json&org=' + location)
    request = urllib2.Request(url)

    # Pretend to be a real web browser
    request.add_header(
        'User-Agent',
        'Mozilla/5.0 (X11; U; Linux i686) '
        'Gecko/20071127 Firefox/2.0.0.11')
    opener = urllib2.build_opener()
    response = opener.open(request).read()

    # Convert the JSON string into a python dictionary
    data = json.loads(response)

    # Extract the data about the measure we're interested in
    for n in range(len(data['measures'])):
        if data['measures'][n]['id'] == measure:
            for datum in data['measures'][n]['data']:
                #print datum
                percentiles.append(datum['percentile'])
                dates.append(datum['date'])
                calc_value.append(datum['calc_value'])
#convert missing percentile values from None to numpy nan
percentiles2 = np.array(map(lambda x: np.nan
                            if x==None else x, percentiles))
return {'percentiles':percentiles2,
        'dates':dates,
        'calc_value':calc_value}

def get_measures():
    measures = []
    url = ('https://openprescribing.net/'
          'api/1.0/measure_by_practice/?format=json&org=G82105')
    request = urllib2.Request(url)
    request.add_header(
        'User-Agent',
        'Mozilla/5.0 (X11; U; Linux i686) '
        'Gecko/20071127 Firefox/2.0.0.11')
    opener = urllib2.build_opener()
    response = opener.open(request).read()
    data = json.loads(response)

    # Extract the data about the measure we're interested in

```

```

    #for n in range(len(data['measures'])):
    for datum in data['measures']:
        #print datum
        measures.append(datum['id'])
    return measures

```

```

In [2]: def get_ccgs_practices():
    with open('Patient_List_Size_CCG_2016_09.csv') as csvfile:
        ccgs = []
        ccgs_import = csv.reader(csvfile, delimiter=',')
        for row in ccgs_import:
            ccgs.append(row[0])
    with open('gp-reg-patients-prac-quin-age_2019_09.csv') as csvfile:
        practices = []
        practices_import = csv.reader(csvfile, delimiter=',')
        for row in practices_import:
            practices.append(row[0])
    return {'ccgs':ccgs, 'practices':practices}

```

## 1.2 Import deciles from csv

```

In [8]: import csv
    def get_deciles(measure, location):
        with open('allmeasuresdeciles_12_16.csv') as csvfile:
            deciles_import = csv.reader(csvfile, delimiter=',')
            date = []
            d_10 = []
            d_20 = []
            d_30 = []
            d_40 = []
            d_50 = []
            d_60 = []
            d_70 = []
            d_80 = []
            d_90 = []
            for row in deciles_import:
                if row[1] == measure:
                    date.append(row[0])
                    if len(location) == 3:
                        d_10.append(float(row[2]))
                        d_20.append(float(row[3]))
                        d_30.append(float(row[4]))
                        d_40.append(float(row[5]))
                        d_50.append(float(row[6]))
                        d_60.append(float(row[7]))
                        d_70.append(float(row[8]))
                        d_80.append(float(row[9]))
                        d_90.append(float(row[10]))

```

```

        else:
            d_10.append(float(row[11]))
            d_20.append(float(row[12]))
            d_30.append(float(row[13]))
            d_40.append(float(row[14]))
            d_50.append(float(row[15]))
            d_60.append(float(row[16]))
            d_70.append(float(row[17]))
            d_80.append(float(row[18]))
            d_90.append(float(row[19]))
    dates = [datetime.datetime.strptime(date,
                                        '%d/%m/%Y').date() for date in date]
return {'dates':dates,
        'd_10':d_10, 'd_20':d_20, 'd_30':d_30,
        'd_40':d_40, 'd_50':d_50, 'd_60':d_60,
        'd_70':d_70, 'd_80':d_80, 'd_90':d_90}

```

### 1.3 CUSUM algorithm

```

In [9]: def cusum(data,months_smoothing,sensitivity):
        """performs the CUSUM algorithm on input data string"""
        smax = [0]
        smin = [0]
        # set reference_percentile and threshold at start
        # & if threshold reached
        non_missing_percentiles = data[~np.isnan(data)]
        reference_percentile = [np.mean(non_missing_percentiles
                                        [0:months_smoothing])]
        threshold = [np.std(non_missing_percentiles[0:months_smoothing])
                    * sensitivity] # +remove nan values
        alert = []
        alert_percentile_pos = [None]
        alert_percentile_neg = [None]
        for i in range(1,len(data)):

            if smax[i-1] > threshold[i-1] or smin[i-1] < -threshold[i-1]:
                #generate temp smax/smin
                reference_percentile.append \
                    (np.mean(data[i-months_smoothing:i]
                            [~np.isnan(data[i-months_smoothing:i]))])
                smax_temp = (max(0, data[i] - (reference_percentile[i] +
                                                (0.5 * threshold[i-1] /
                                                 sensitivity)) + smax[i-1]))
                smin_temp = (min(0, data[i] - (reference_percentile[i] -
                                                (0.5 * threshold[i-1] /
                                                 sensitivity)) + smin[i-1]))

                #test whether change still occurring *IN THE SAME DIRECTION*

```

```

## positive change
if smax[i-1] < smax_temp and smax[i-1] > threshold[i-1]:
    threshold.append(threshold[i-1])
    smax.append(smax_temp)
    smin.append(smin_temp)
    alert.append(i-1)
    alert_percentile_pos.append(data[i])
    alert_percentile_neg.append(None)

## negative change
elif smin[i-1] > smin_temp and smin[i-1] < -threshold[i-1]:
    threshold.append(threshold[i-1])
    smax.append(smax_temp)
    smin.append(smin_temp)
    alert.append(i-1)
    alert_percentile_pos.append(None)
    alert_percentile_neg.append(data[i])

## if not, reset
else:
    alert.append(i-1)
    threshold.append(np.std(data[i-months_smoothing:i]
                           [~np.isnan(data[i-months_smoothing:i])])
                    * sensitivity) # +remove nan values
    #reset smax/smin to 0
    #modified to include the value for the current month
    smax.append(max(0, data[i] - (reference_percentile[i] +
                                (0.5 * threshold[i] /
                                 sensitivity))))
    smin.append(min(0, data[i] - (reference_percentile[i] -
                                (0.5 * threshold[i] /
                                 sensitivity))))

    alert_percentile_pos.append(None)
    alert_percentile_neg.append(None)

#else append previous values
else:
    reference_percentile.append(reference_percentile[i-1])
    threshold.append(threshold[i-1])

#calculate smax/smin
    smax.append(max(0, data[i] - (reference_percentile[i] +
                                (0.5 * threshold[i] /
                                 sensitivity)) + smax[i-1]))
    smin.append(min(0, data[i] - (reference_percentile[i] -
                                (0.5 * threshold[i] /
                                 sensitivity)) + smin[i-1]))

```

```

    if smax[i] > threshold[i]:
        alert_percentile_pos.append(data[i])
        alert_percentile_neg.append(None)
    elif smin[i] < -threshold[i]:
        alert_percentile_neg.append(data[i])
        alert_percentile_pos.append(None)
    else:
        alert_percentile_pos.append(None)
        alert_percentile_neg.append(None)
return {'smax':smax, 'smin':smin,
        'reference_percentile':reference_percentile,
        'threshold':threshold,
        'alert':alert,
        'alert_percentile_pos':alert_percentile_pos,
        'alert_percentile_neg':alert_percentile_neg}

```

## 1.4 Draw plots

```

In [10]: def draw_plots(cusum_out, percentiles, dates, deciles):
    """draws 3 plots containing measure, alerts and CUSUM"""
    #plot deciles and percentile values
    negthreshold = [ -x for x in cusum_out['threshold']]
    plt.figure(figsize=(5, 10))
    plt.subplot(311)
    plt.plot(deciles['dates'],deciles['d_10'],
             color = '#298CFF', linestyle = ':')
    plt.plot(deciles['dates'],deciles['d_20'],
             color = '#298CFF', linestyle = ':')
    plt.plot(deciles['dates'],deciles['d_30'],
             color = '#298CFF', linestyle = ':')
    plt.plot(deciles['dates'],deciles['d_40'],
             color = '#298CFF', linestyle = ':')
    plt.plot(deciles['dates'],deciles['d_50'],
             color = '#298CFF', label = 'Median')
    plt.plot(deciles['dates'],deciles['d_60'],
             color = '#298CFF', linestyle = ':')
    plt.plot(deciles['dates'],deciles['d_70'],
             color = '#298CFF', linestyle = ':')
    plt.plot(deciles['dates'],deciles['d_80'],
             color = '#298CFF', linestyle = ':')
    plt.plot(deciles['dates'],deciles['d_90'],
             color = '#298CFF', linestyle = ':', label = 'Deciles')
    plt.plot(dates,percentiles['calc_value'],
             'r', label = 'Measure')
    plt.ylabel('measure')
    plt.legend(bbox_to_anchor=(1.02, 1),
              loc=2, borderaxespad=0.,fontsize=10)

```

```

#plot percentile and determined percentile
plt.subplot(312)
plt.plot(dates,percentiles['percentiles'],
         'g', label = 'Percentile')
plt.plot(dates,cusum_out['alert_percentile_pos'],
         'ro', label = 'Increase alerts')
plt.plot(dates,cusum_out['reference_percentile'],
         'b', label = 'Reference percentile')
plt.plot(dates,cusum_out['alert_percentile_neg'],
         'go', label = 'Decrease alerts')
plt.ylabel('percentile')
plt.legend(bbox_to_anchor=(1.02, 1),
         loc=2, borderaxespad=0.,fontSize=10)

#plot CUSUM/threshold graph
plt.subplot(313)
plt.plot(dates,cusum_out['smax'],
         'c', label = 'CUSUM +ve')
plt.plot(dates,cusum_out['smin'],
         'r', label = 'CUSUM -ve')
plt.plot(dates,cusum_out['threshold'],
         'k--', label = 'Thresholds')
plt.plot(dates,negthreshold,
         'k--')
plt.ylabel('CUSUM')
plt.legend(bbox_to_anchor=(1.02, 1),
         loc=2, borderaxespad=0.,fontSize=10)

plt.show()
print ''
print ''
print ''

```

## 1.5 Testing

```

In [18]: #Analyse
def analyse(measure, location):
    if len(location) == 3:
        print "Measure: https://openprescribing.net/ccg/%s/%s" % (location[0], location[1])
    else:
        print "Measure: https://openprescribing.net/practice/%s/%s" % (location[0], location[1])
    #CHANGE THESE to alter the MEASURE and/or CCG/PRACTICE
    percentiles_dates = get_percentiles_for(measure, location)
    dates = [datetime.datetime.strptime(date, '%Y-%m-%d').date()
             for date in percentiles_dates['dates']]
    deciles = get_deciles(measure, location)

```

```
#CHANGE THESE NUMBERS to adjust SMOOTHING PERIOD and SENSITIVITY  
cusum_out = cusum(percentiles_dates['percentiles'],12,5)  
draw_plots(cusum_out, percentiles_dates, dates, deciles)
```



## 2 Appendix B -Example graphs

```
In [19]: #RUN ANALYSIS AND DRAW PLOTS -for all measures for 05Y and G85138
        for measure in get_measures():
            for location in ['05Y', 'G85138']:
                analyse(measure, location)
```

Measure: <https://openprescribing.net/ccg/05Y/#fungal>

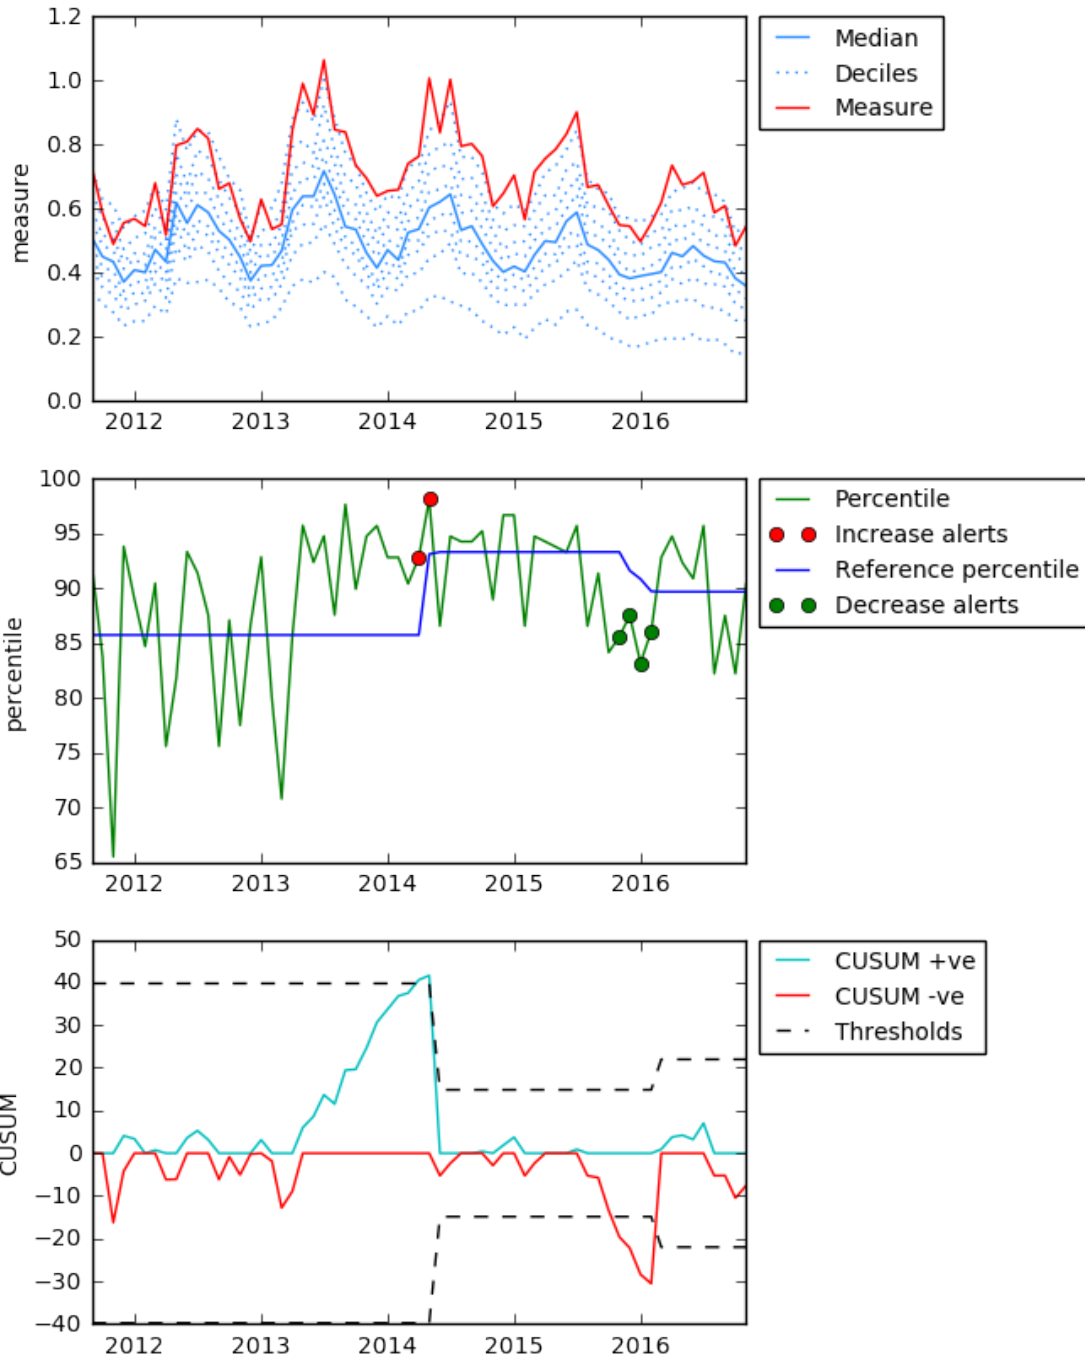

Measure: <https://openprescribing.net/practice/G85138/#fungal>

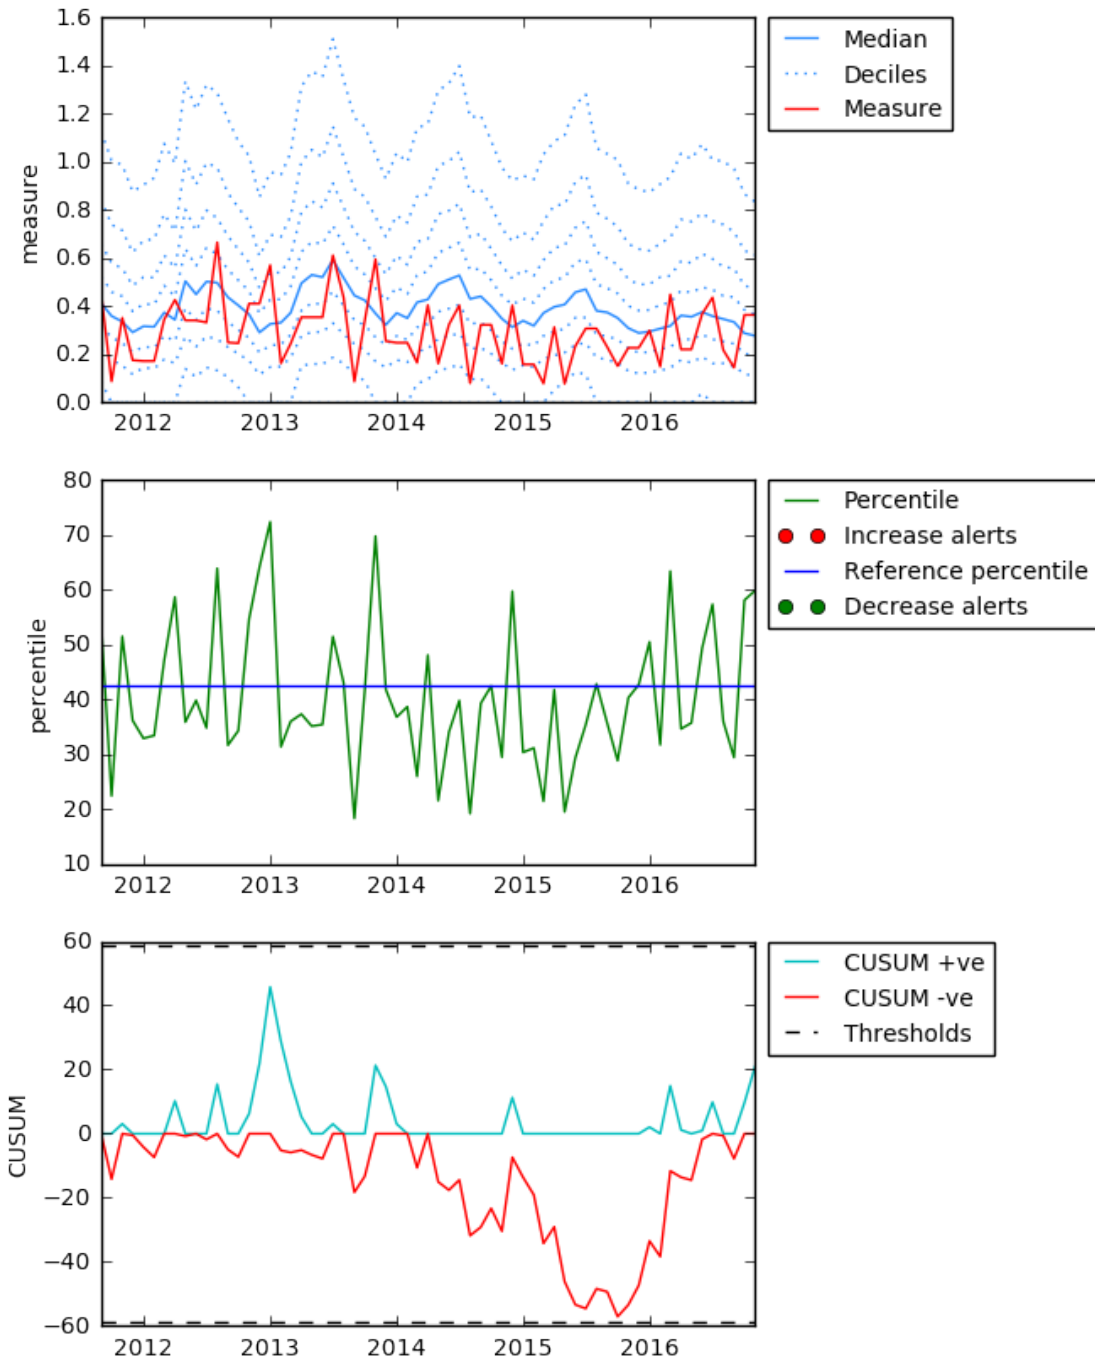

Measure: <https://openprescribing.net/ccg/05Y/#ppi>

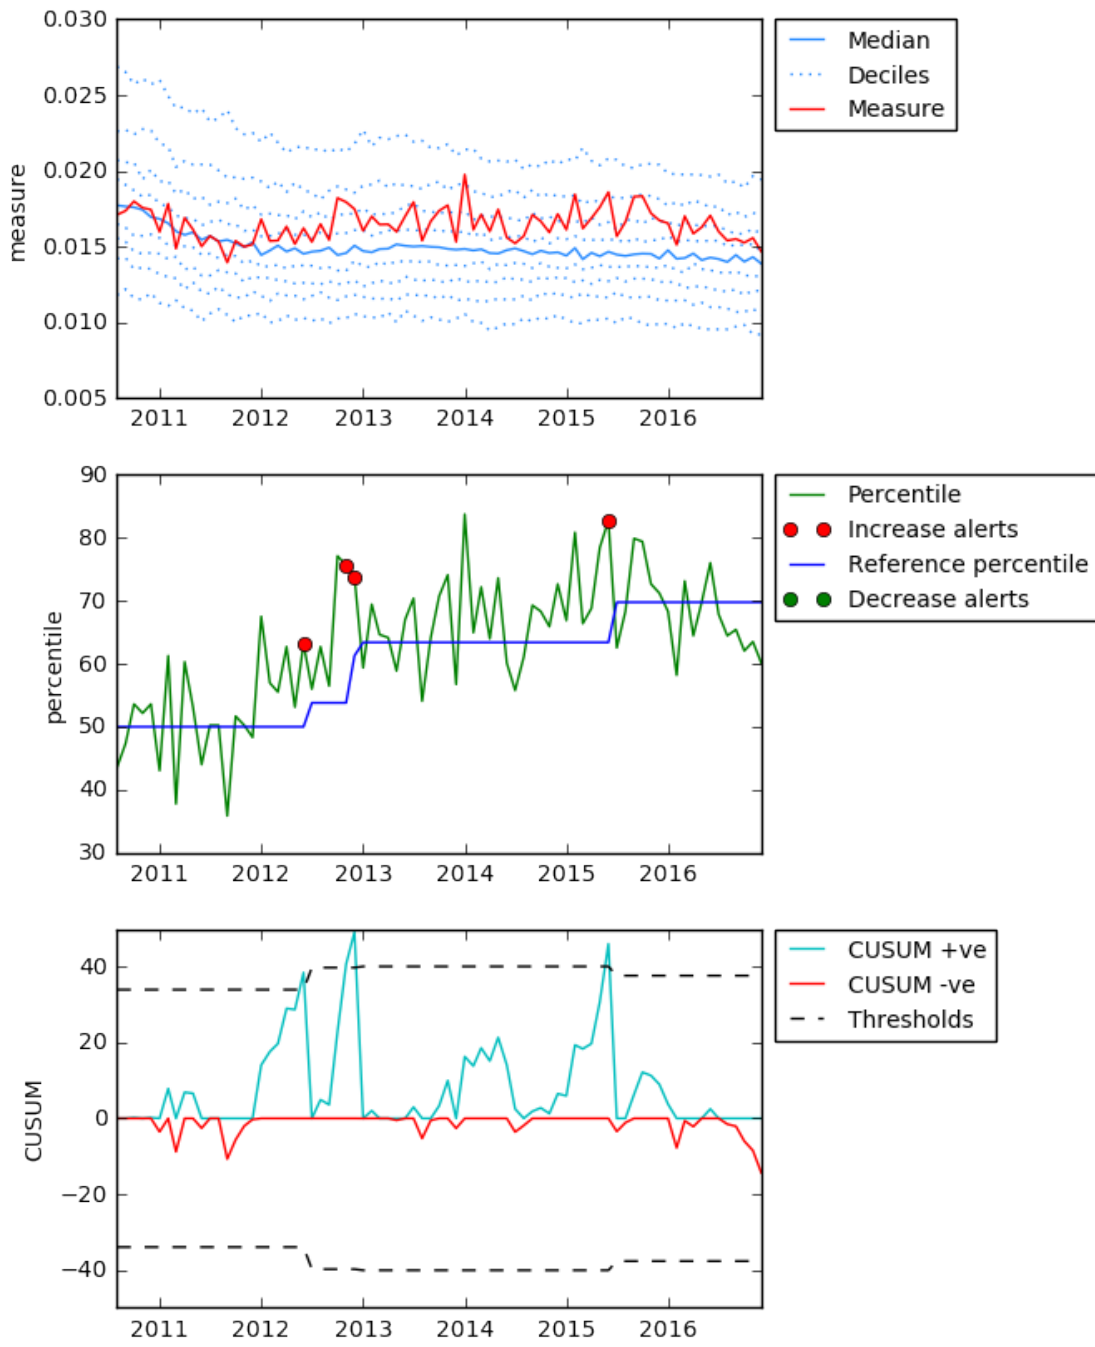

Measure: <https://openprescribing.net/practice/G85138/#ppi>

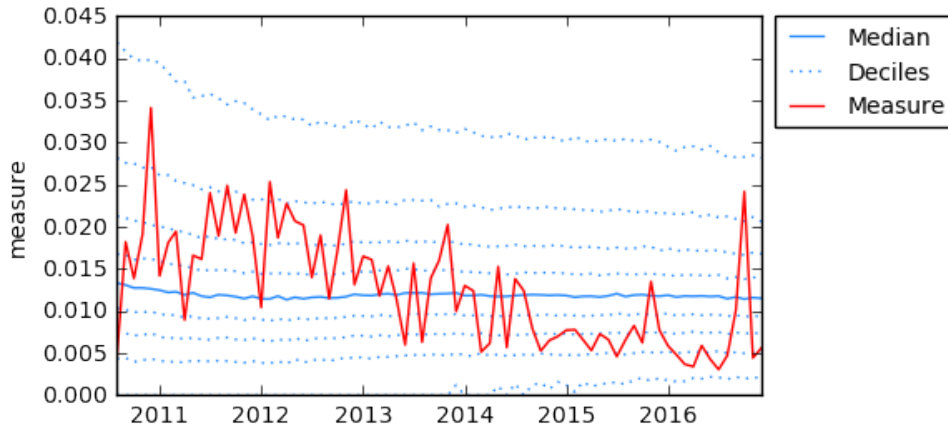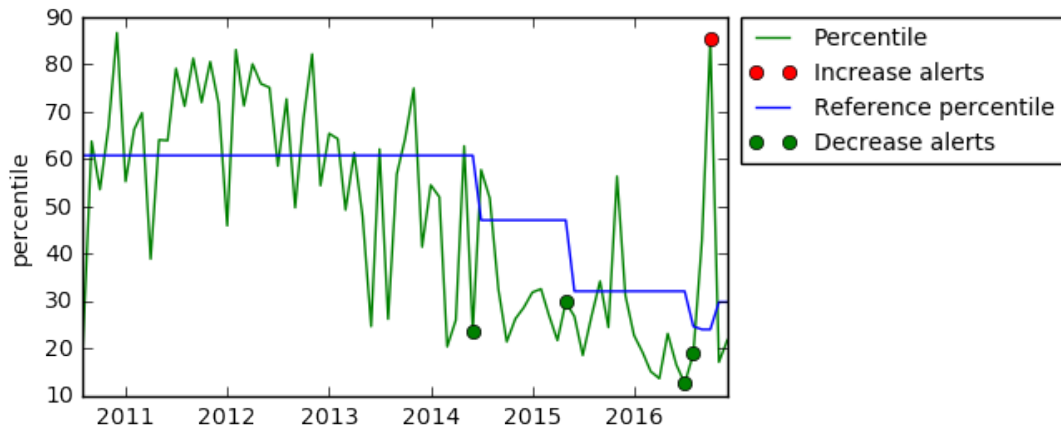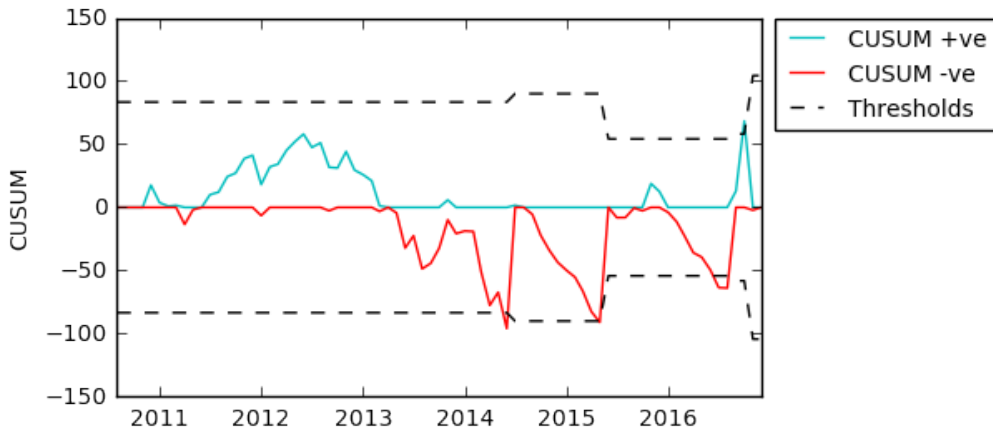

Measure: <https://openprescribing.net/ccg/05Y/#tramadol>

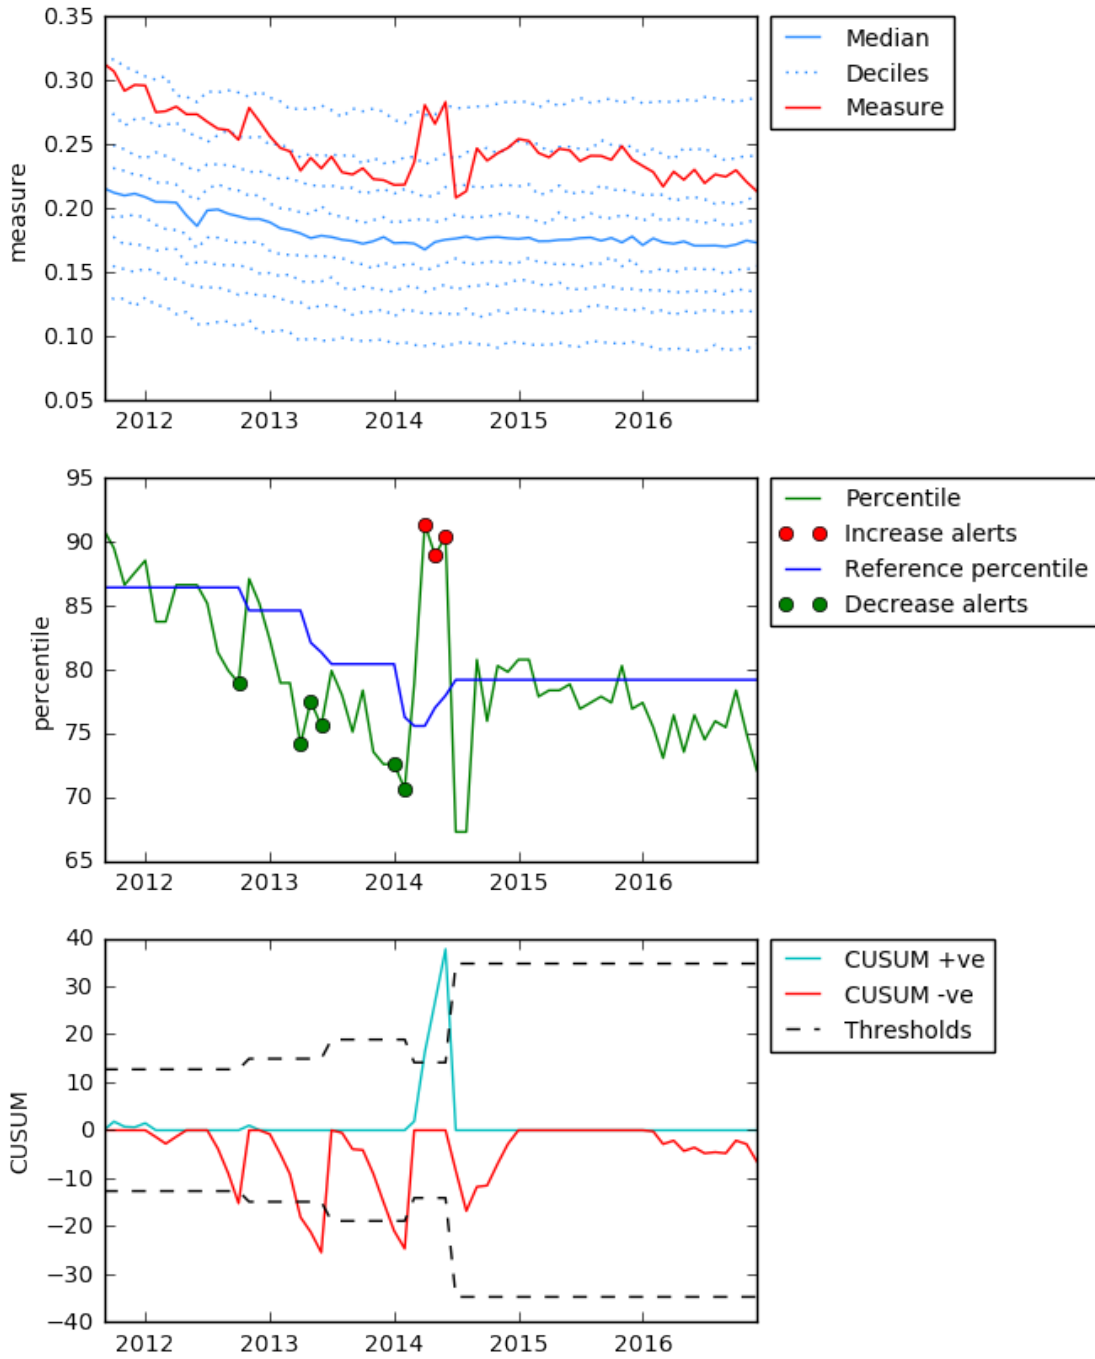

Measure: <https://openprescribing.net/practice/G85138/#tramadol>

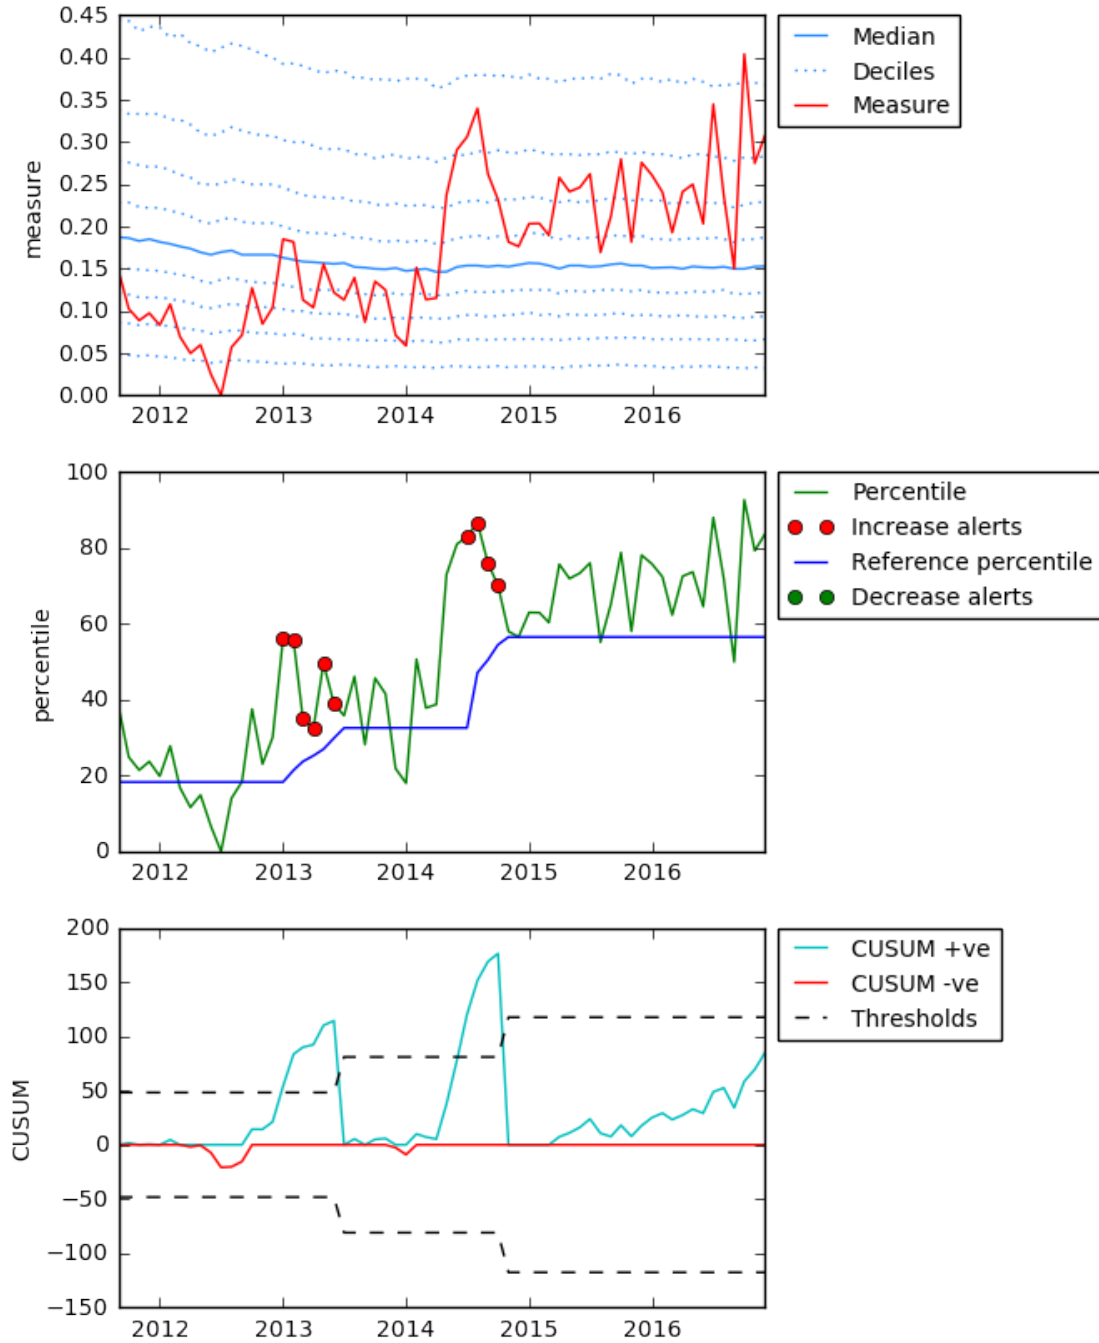

Measure: <https://openprescribing.net/ccg/05Y/#sildenafil>

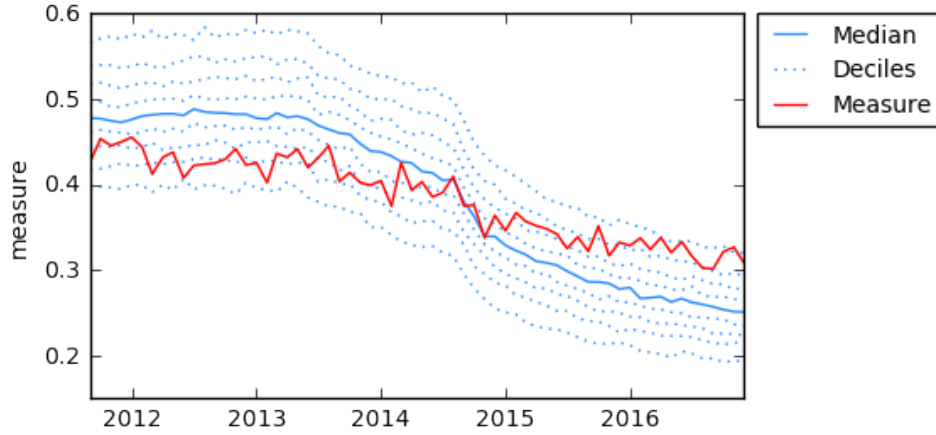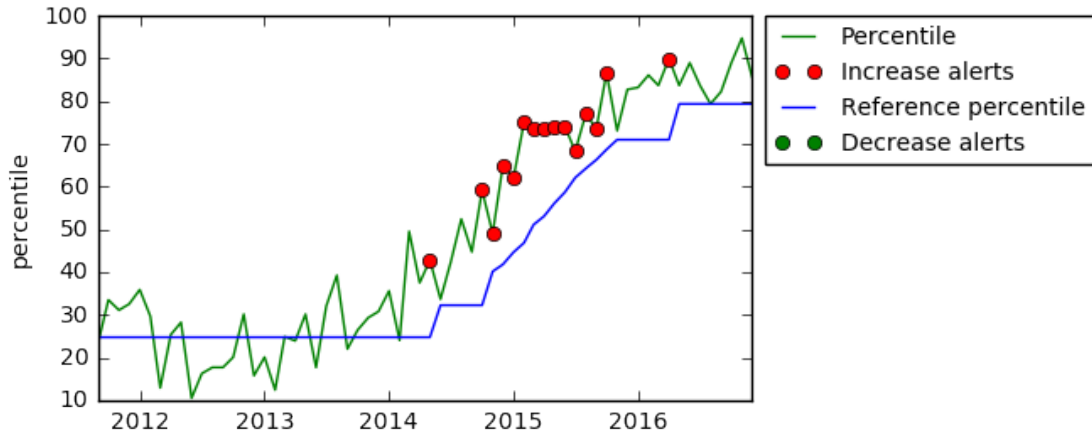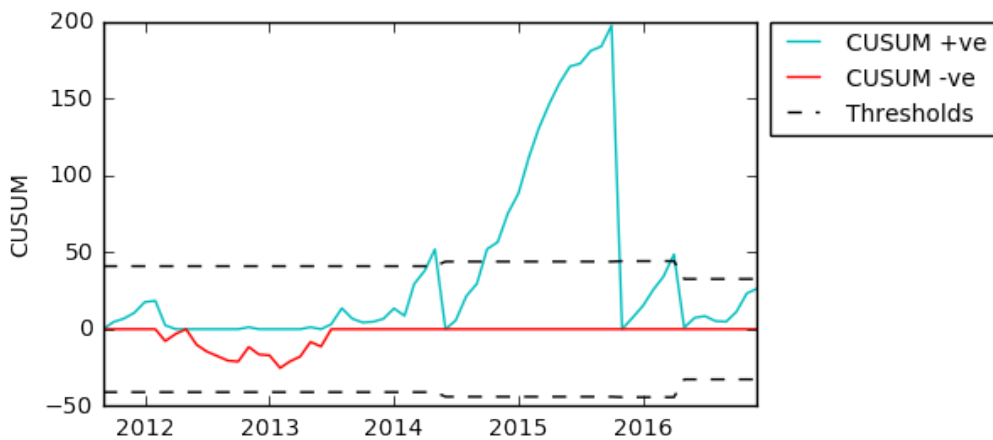

Measure: <https://openprescribing.net/practice/G85138/#sildenafil>

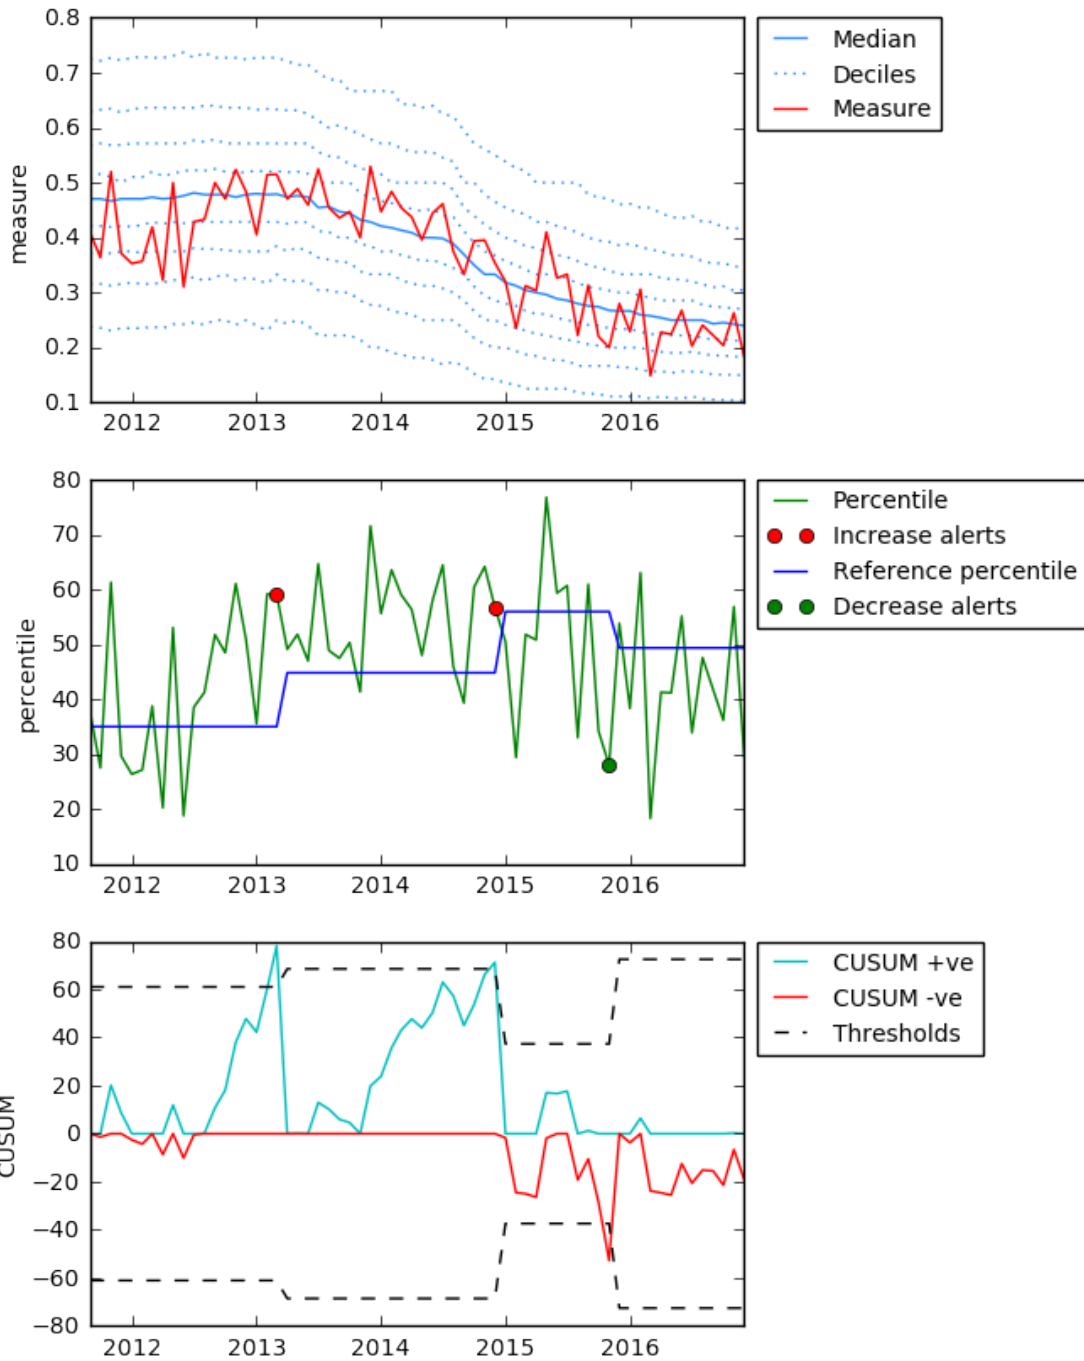



Measure: <https://openprescribing.net/ccg/05Y/#arb>

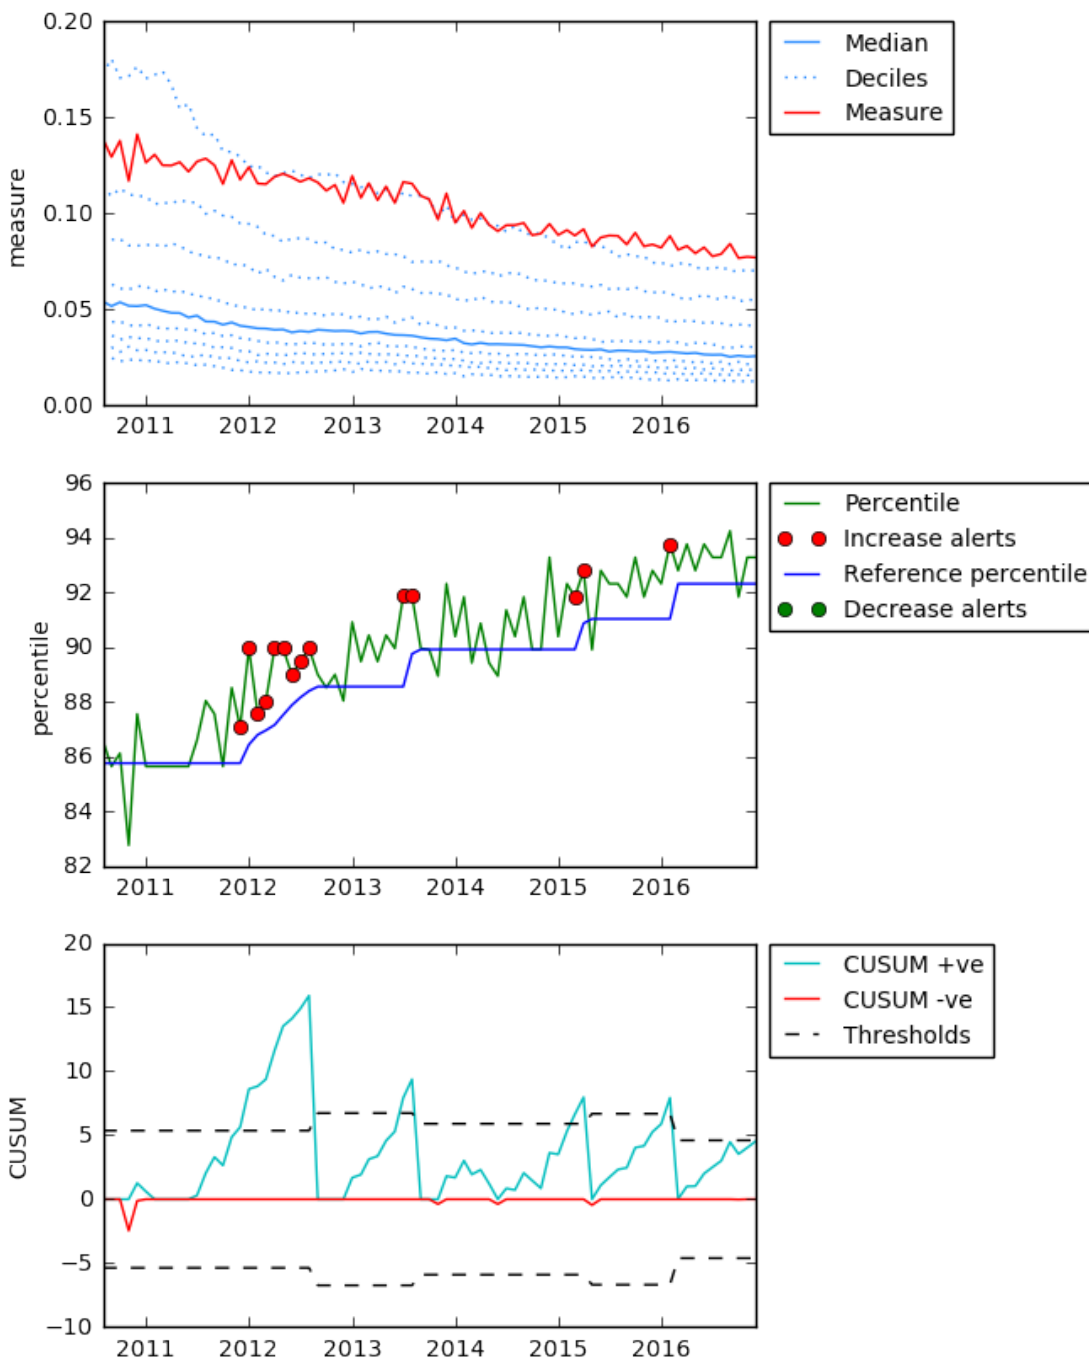

Measure: <https://openprescribing.net/practice/G85138/#arb>

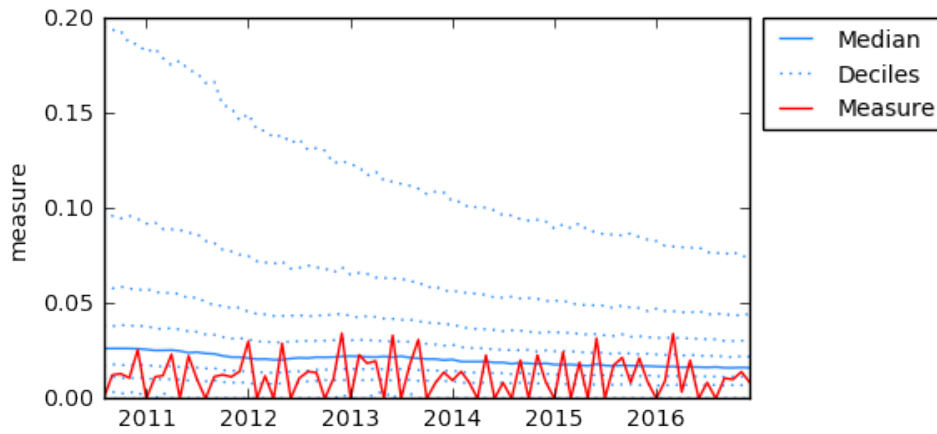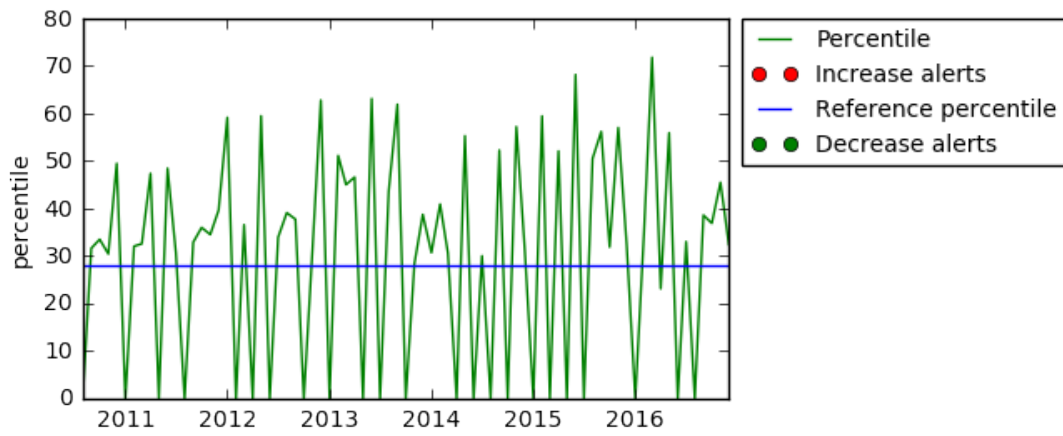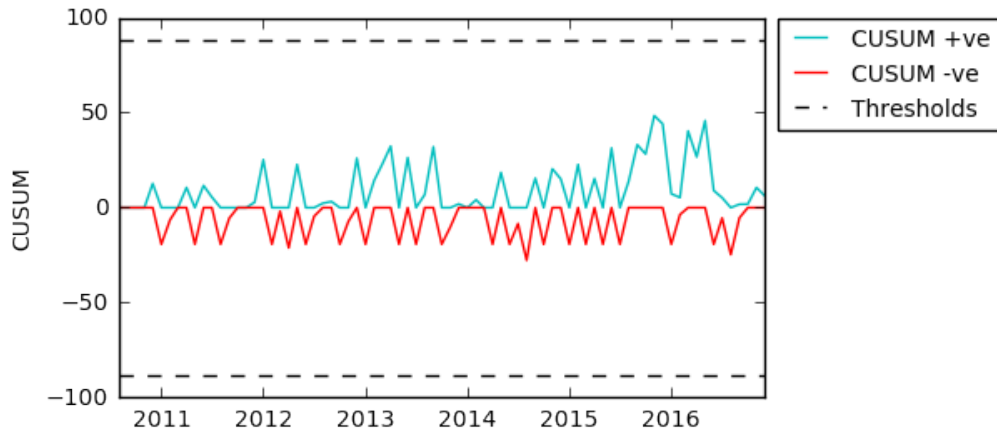

Measure: <https://openprescribing.net/ccg/05Y/#icsdose>

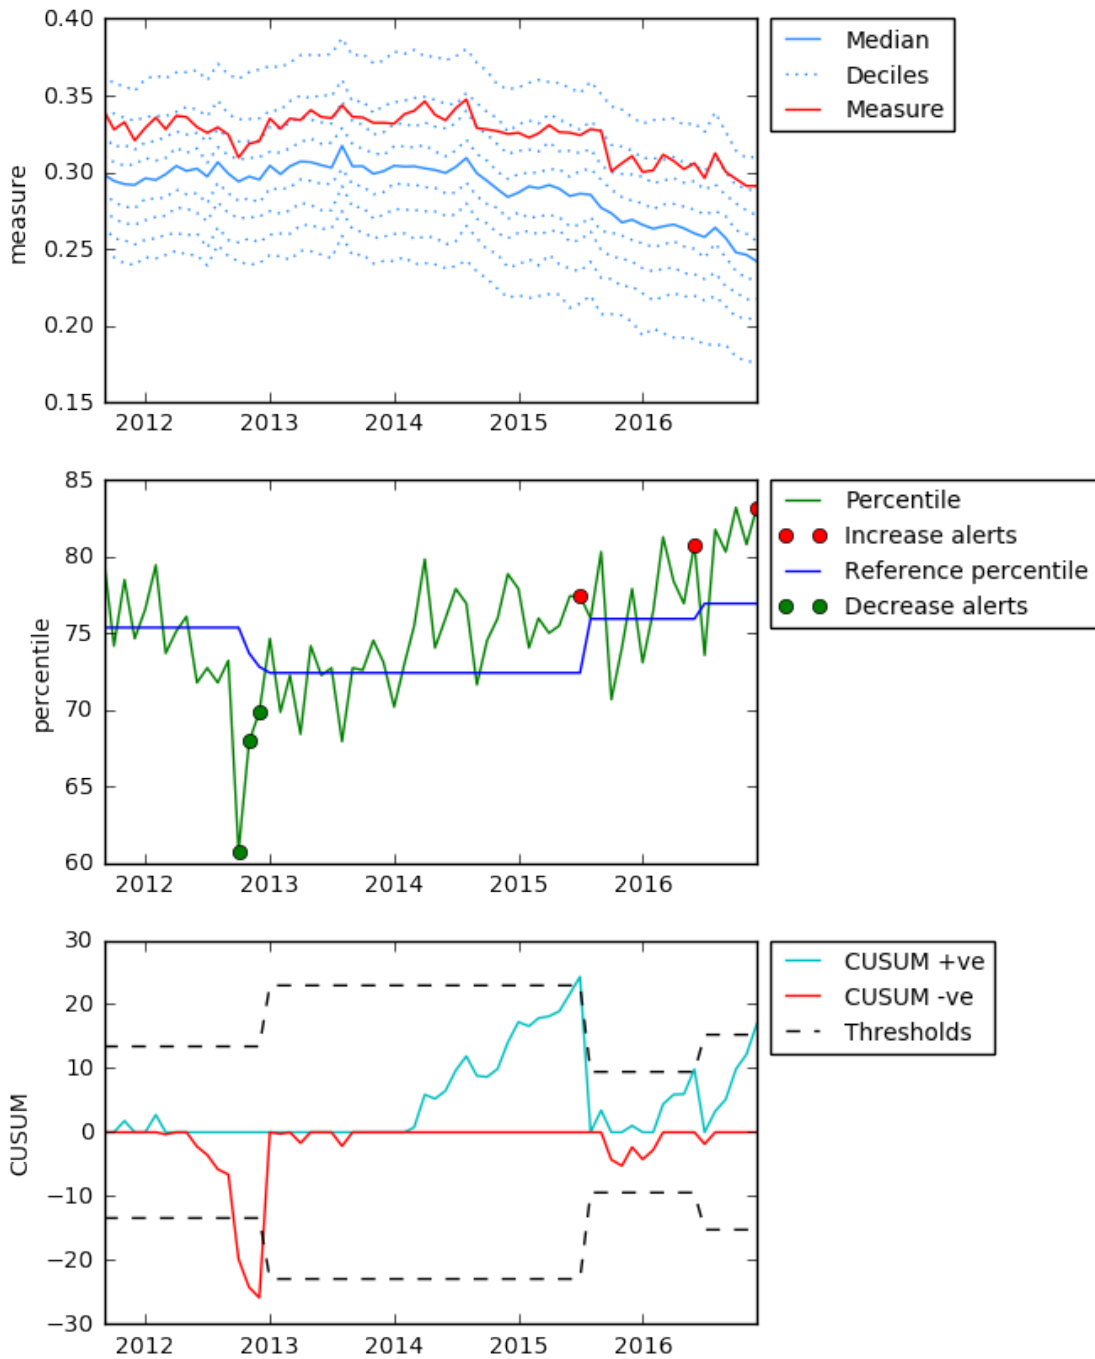

Measure: <https://openprescribing.net/practice/G85138/#icsdose>

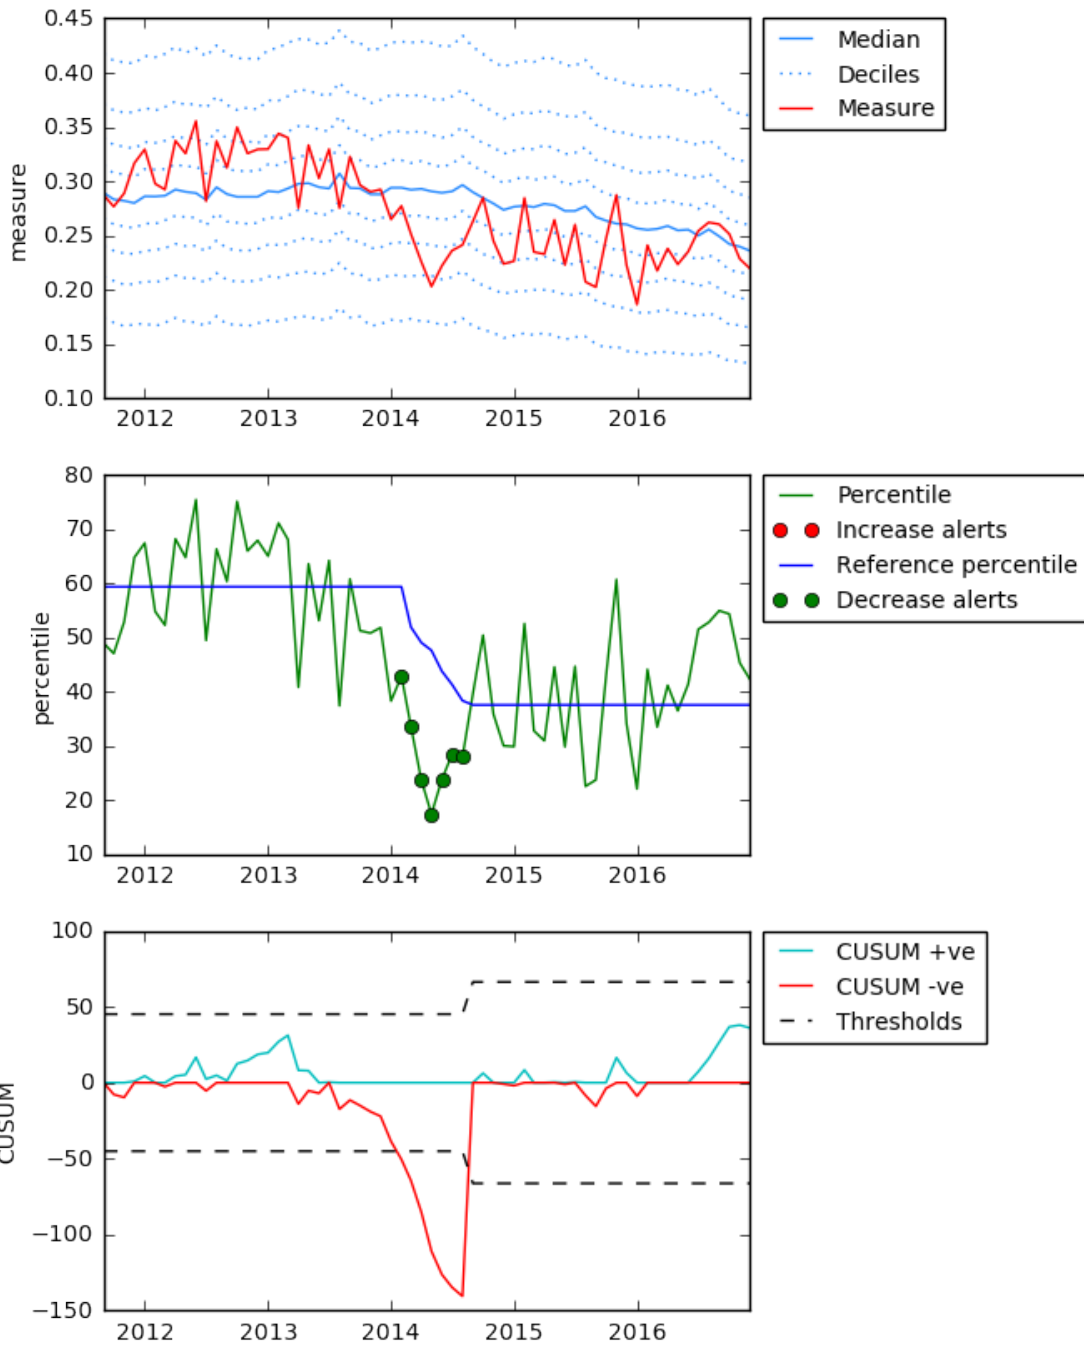

Measure: <https://openprescribing.net/ccg/05Y/#dipyridamole>

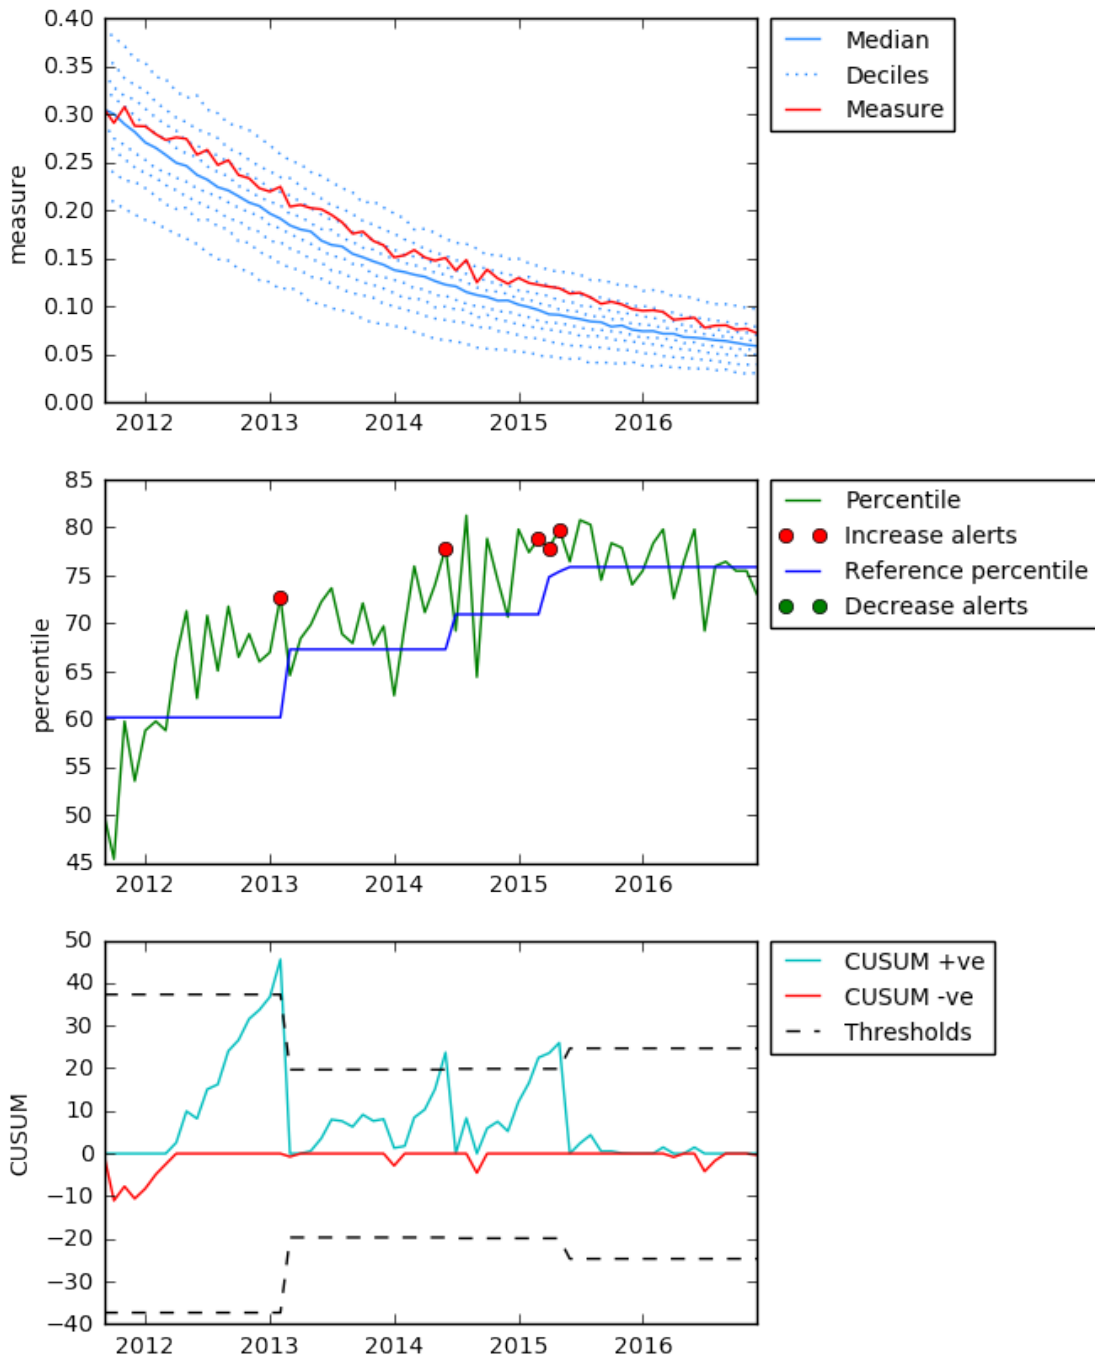

Measure: <https://openprescribing.net/practice/G85138/#dipyridamole>

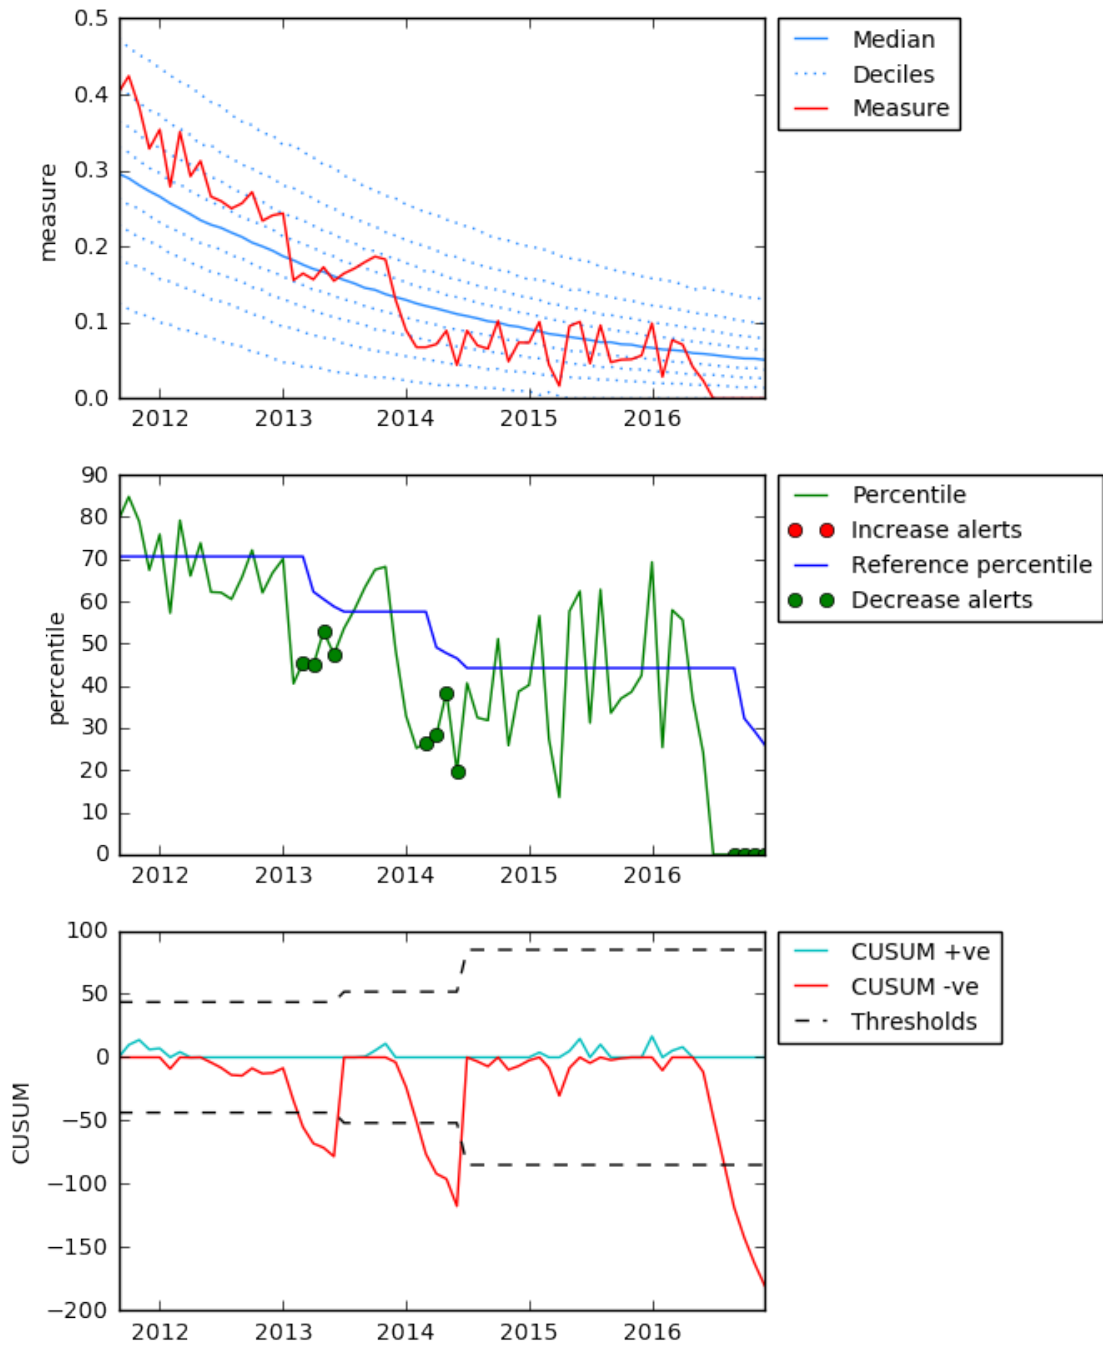

Measure: <https://openprescribing.net/ccg/05Y/#methotrexate>

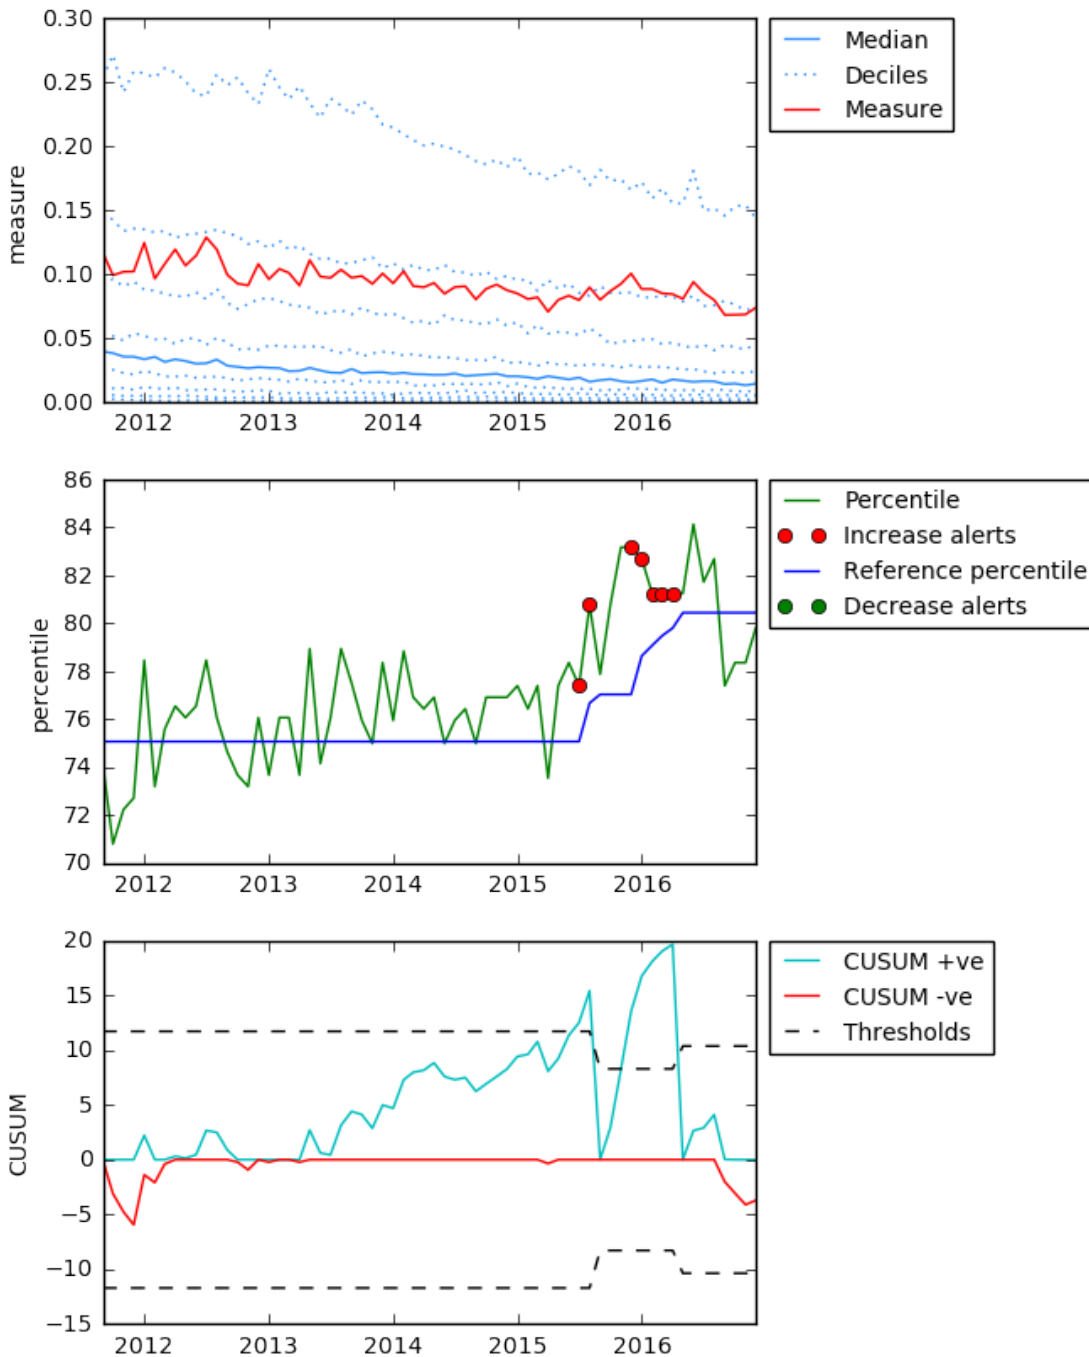

Measure: <https://openprescribing.net/practice/G85138/#methotrexate>

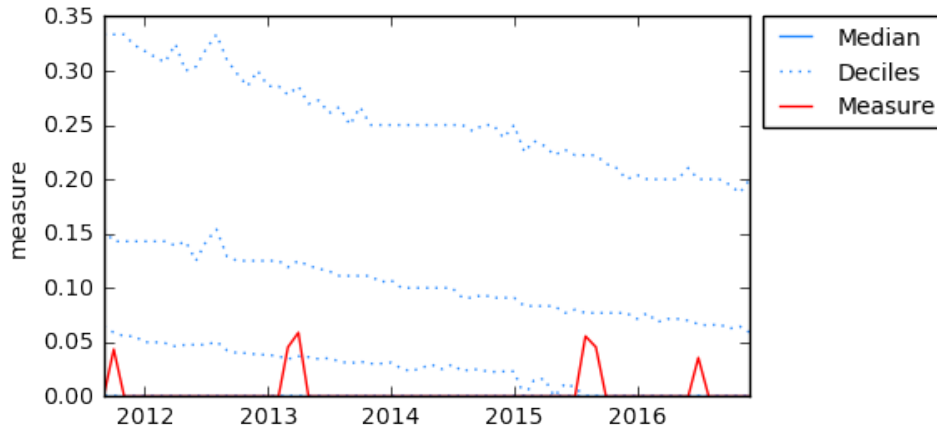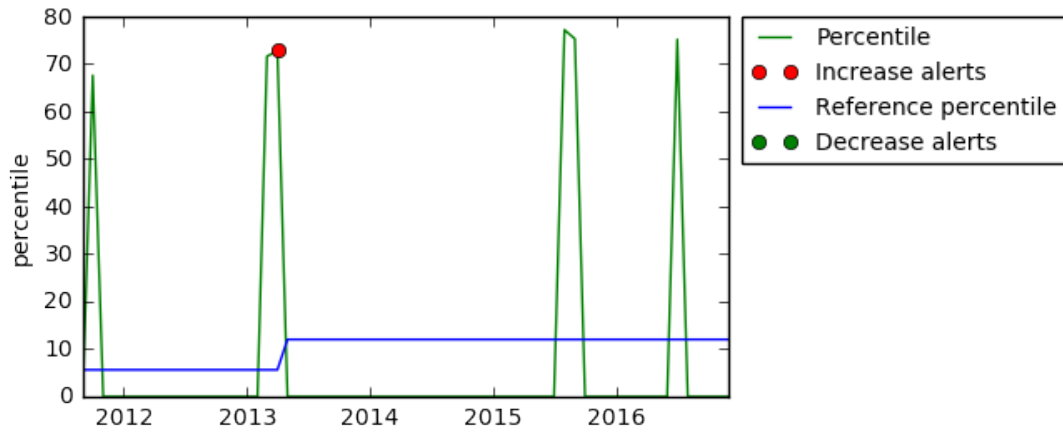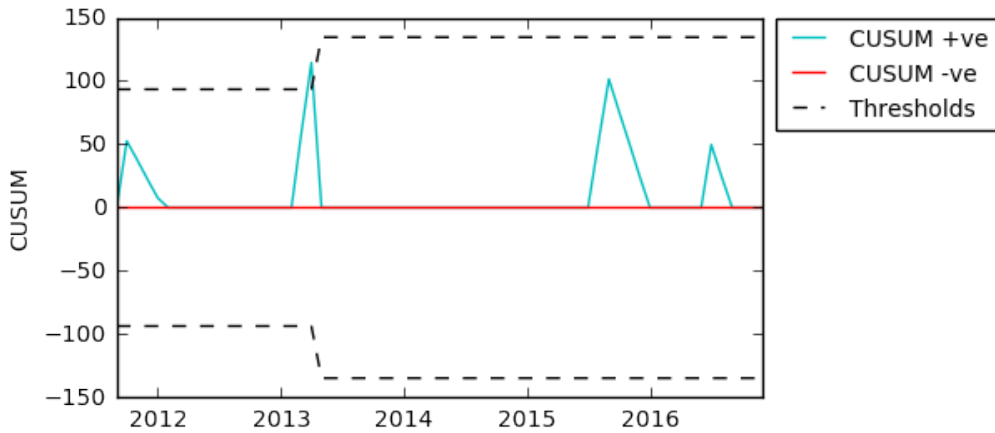



Measure: <https://openprescribing.net/ccg/05Y/#vitb>

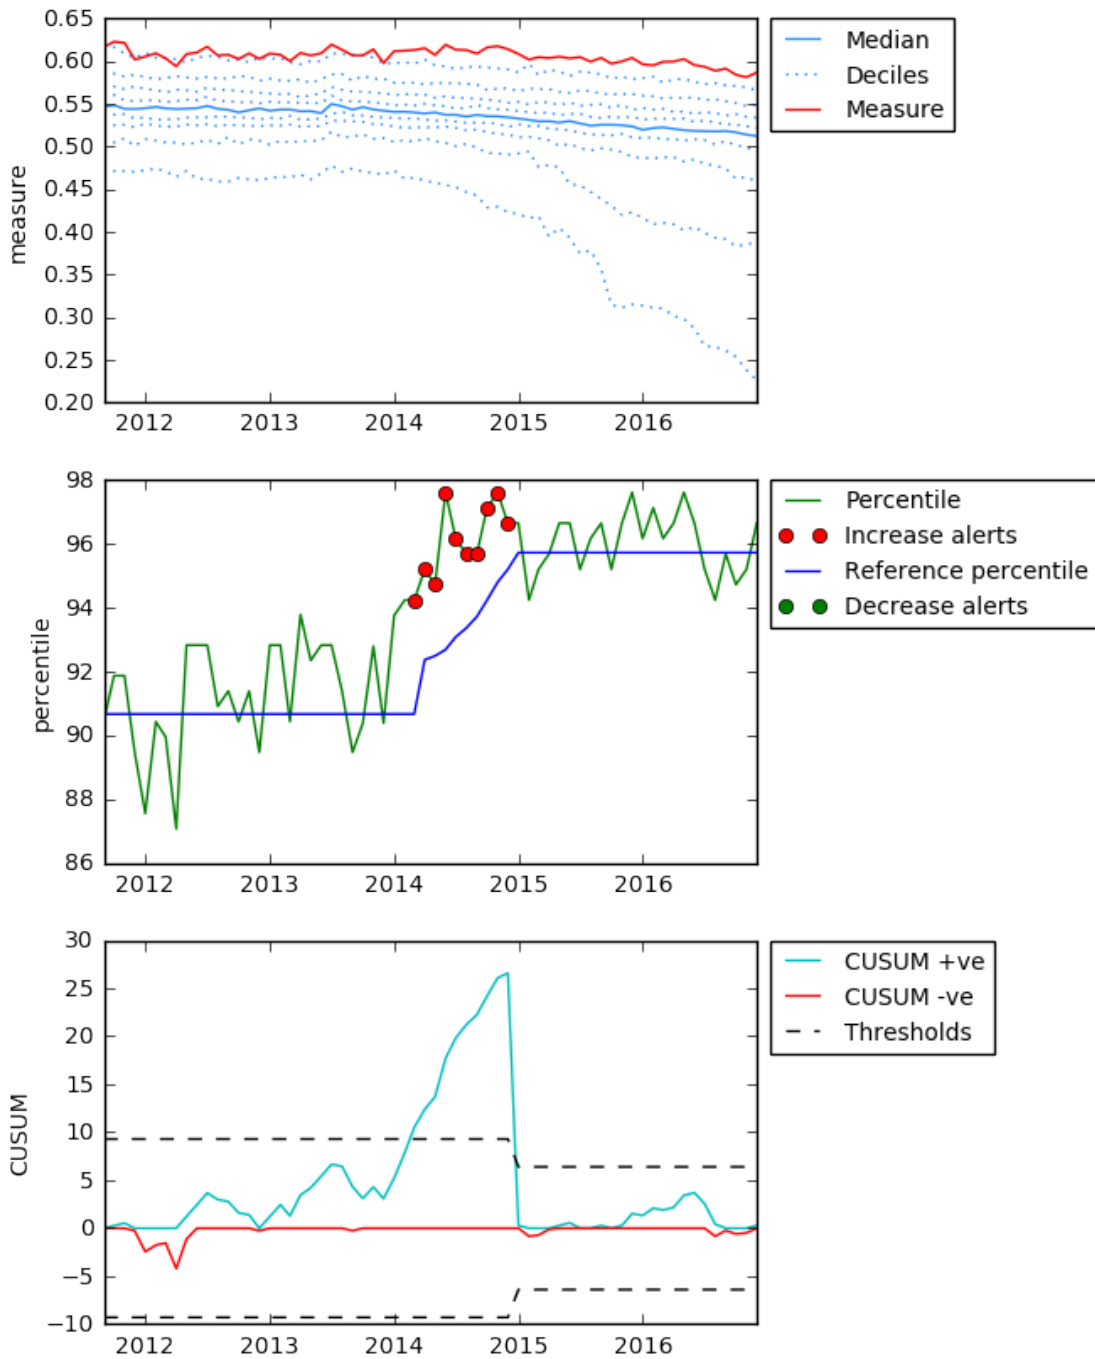

Measure: <https://openprescribing.net/practice/G85138/#vitb>

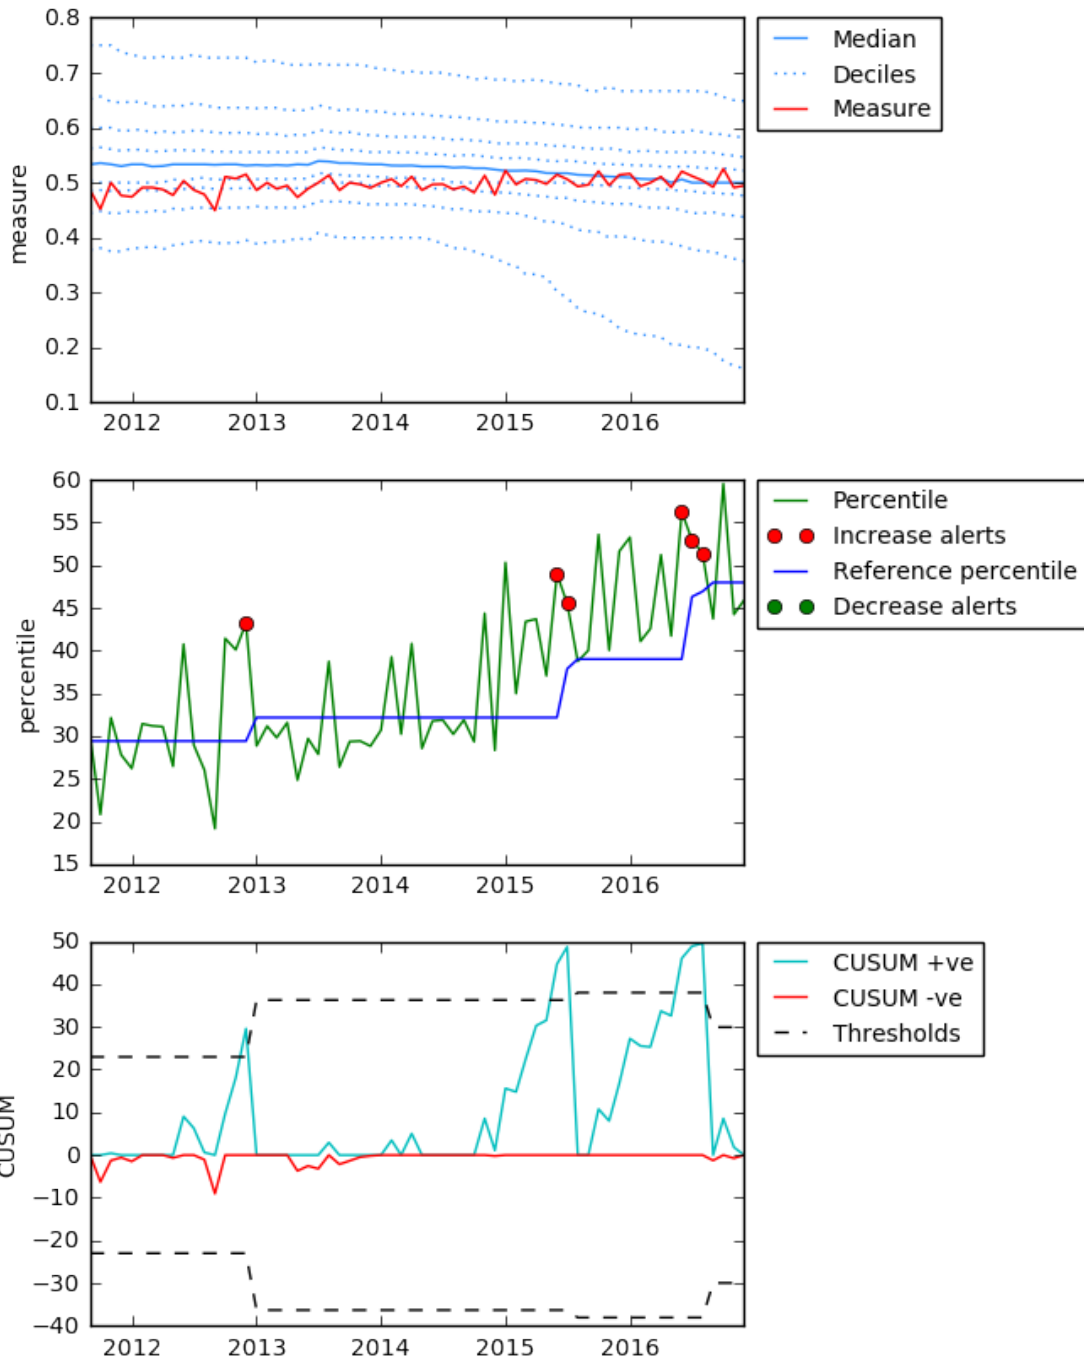

Measure: <https://openprescribing.net/ccg/05Y/#solublepara>

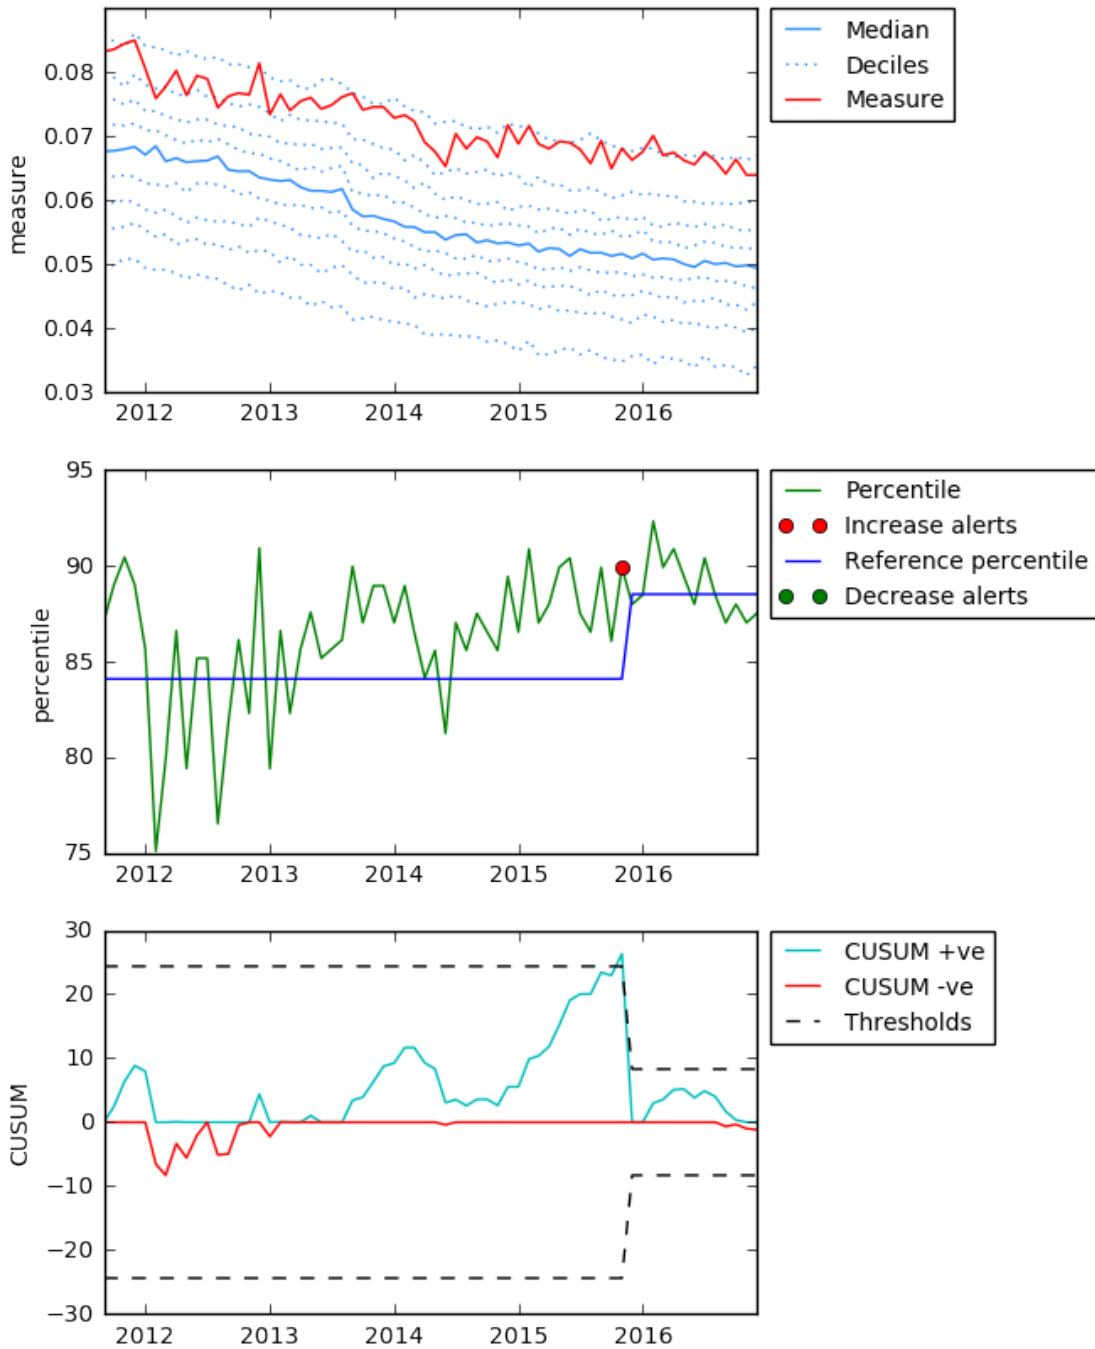

Measure: <https://openprescribing.net/practice/G85138/#solublepara>

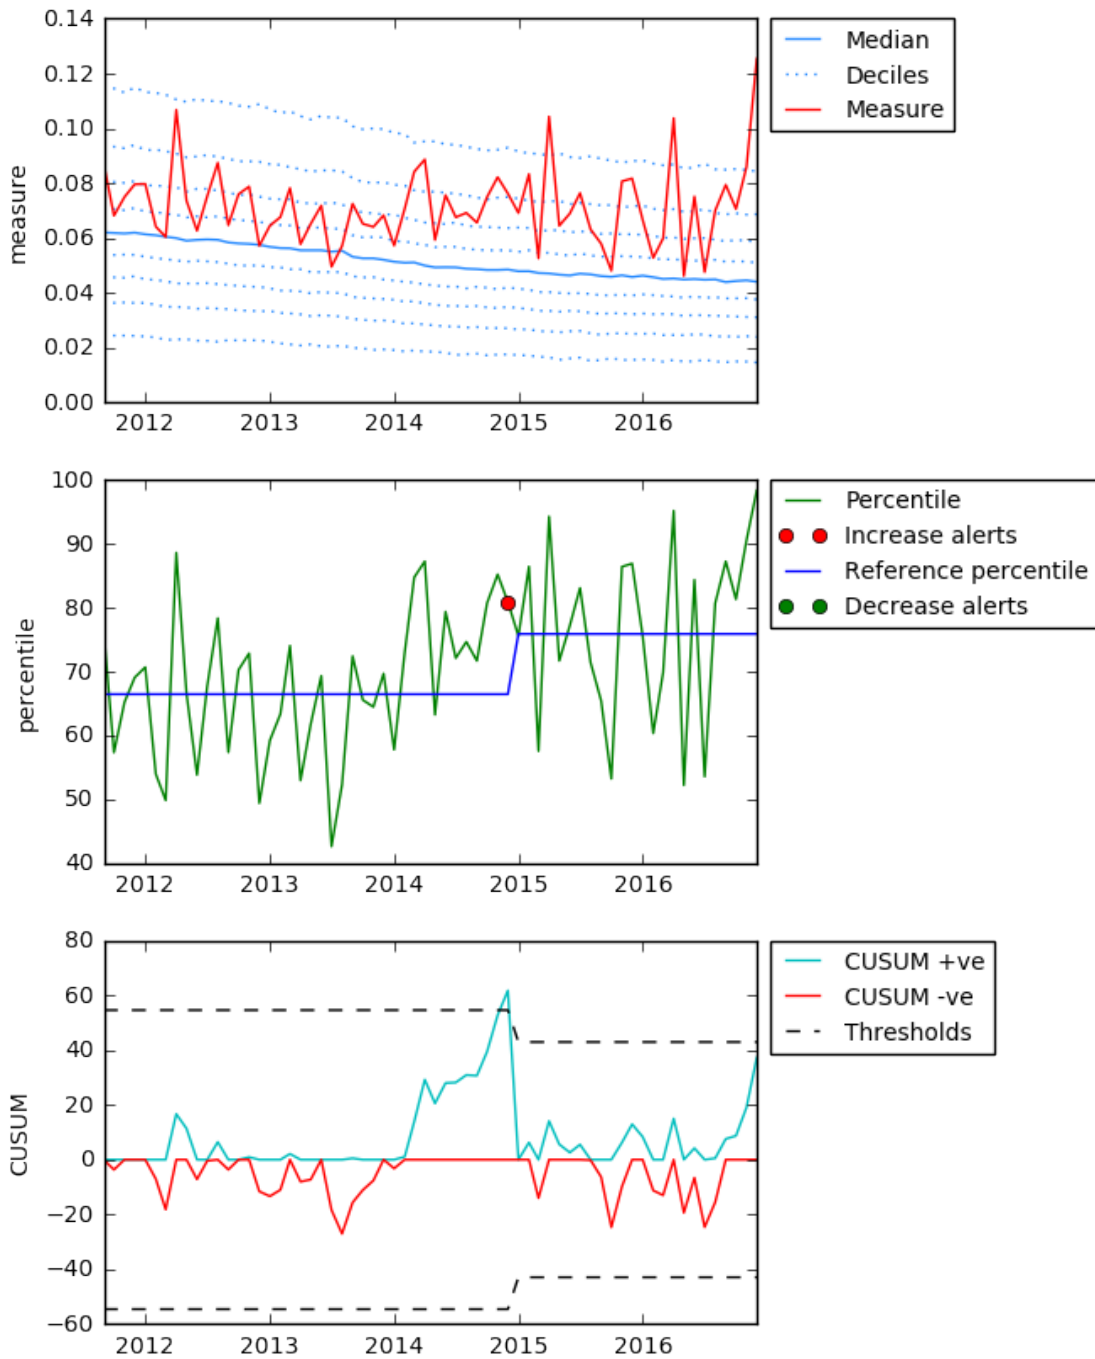

Measure: [https://openprescribing.net/ccg/05Y/#ktt13\\_nsaids\\_ibuprofen](https://openprescribing.net/ccg/05Y/#ktt13_nsaids_ibuprofen)

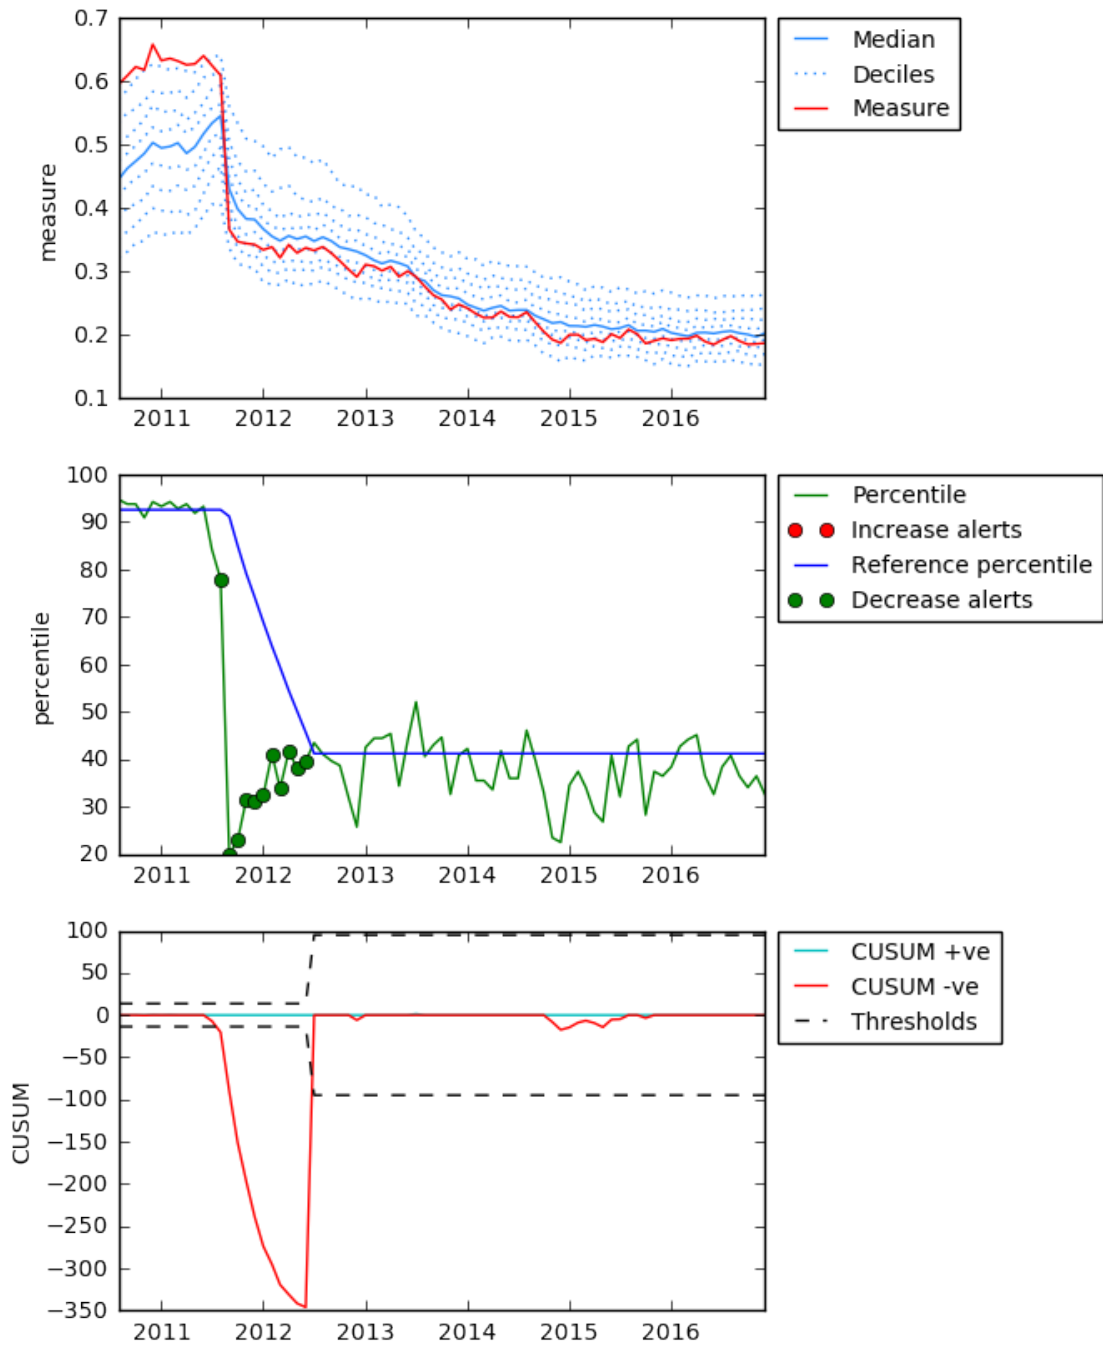

Measure: [https://openprescribing.net/practice/G85138/#ktt13\\_nsaid\\_s\\_ibuprofen](https://openprescribing.net/practice/G85138/#ktt13_nsaid_s_ibuprofen)

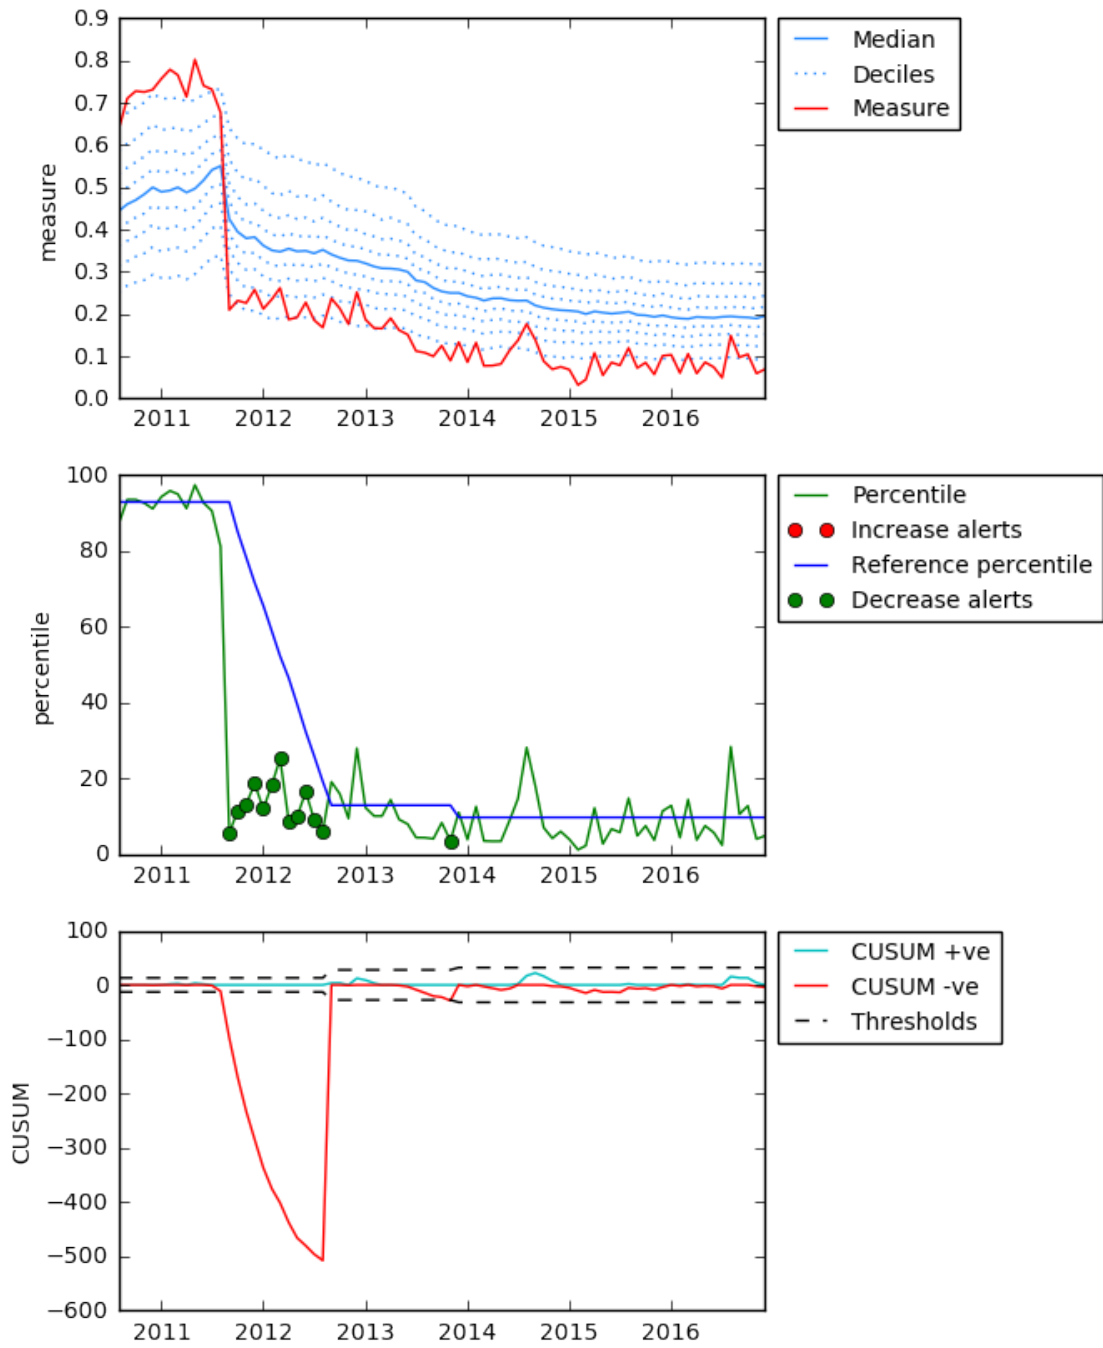

Measure: [https://openprescribing.net/ccg/05Y/#ktt3\\_lipid\\_modifying\\_drugs](https://openprescribing.net/ccg/05Y/#ktt3_lipid_modifying_drugs)

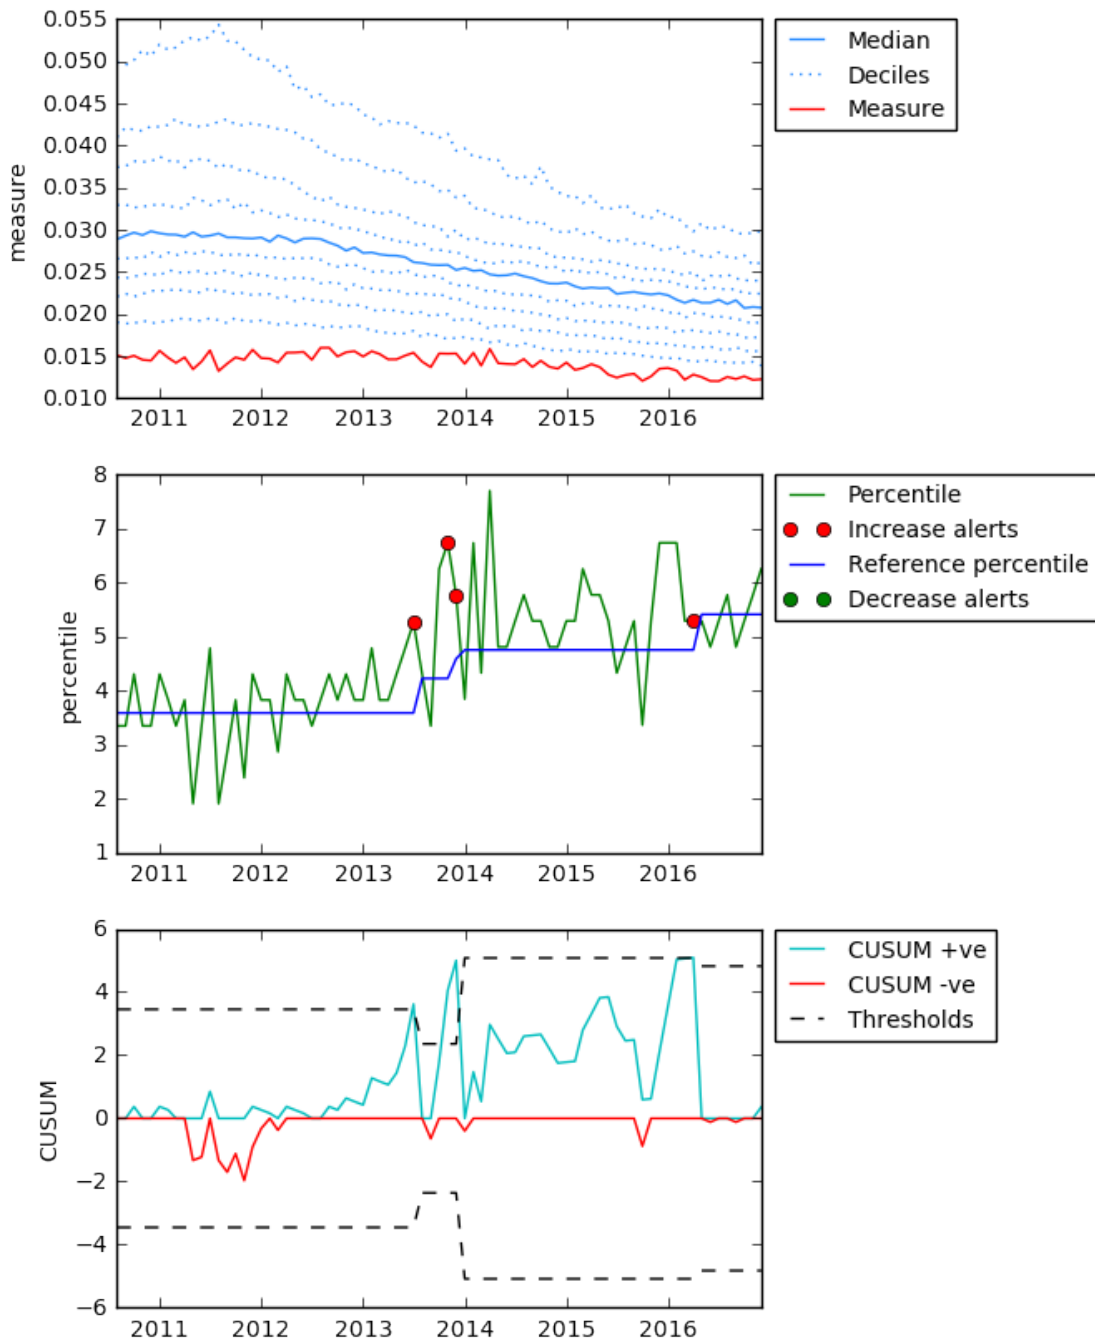

Measure: [https://openprescribing.net/practice/G85138/#ktt3\\_lipid\\_modifying\\_drugs](https://openprescribing.net/practice/G85138/#ktt3_lipid_modifying_drugs)

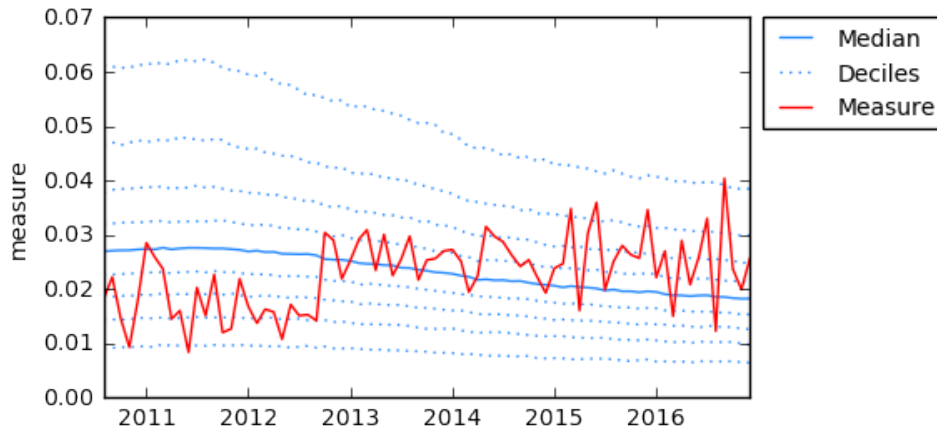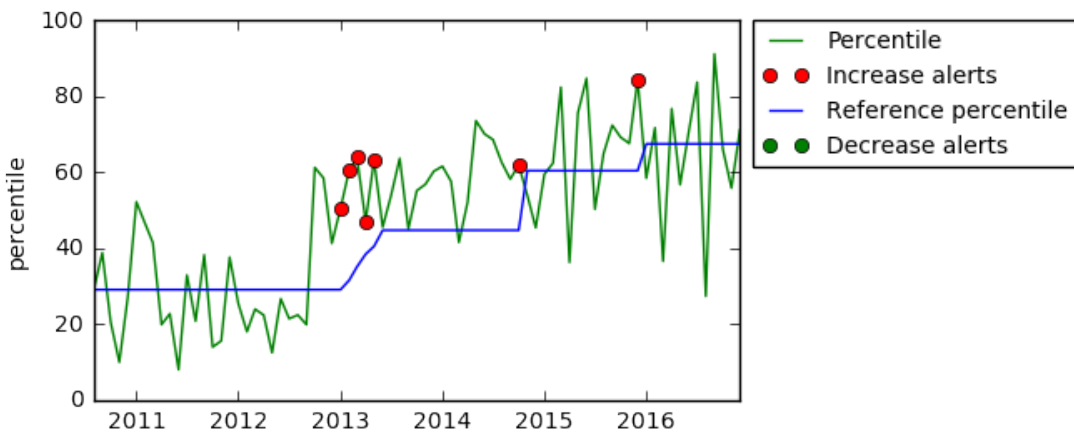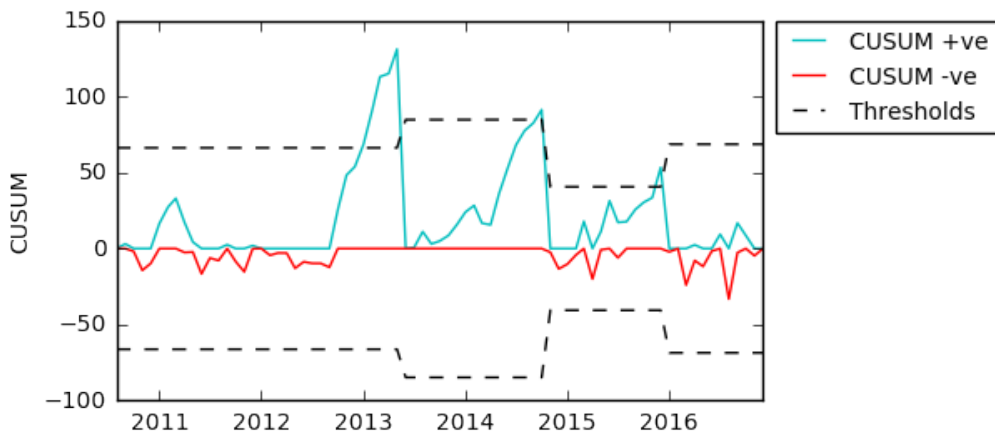



Measure: <https://openprescribing.net/ccg/05Y/#doacs>

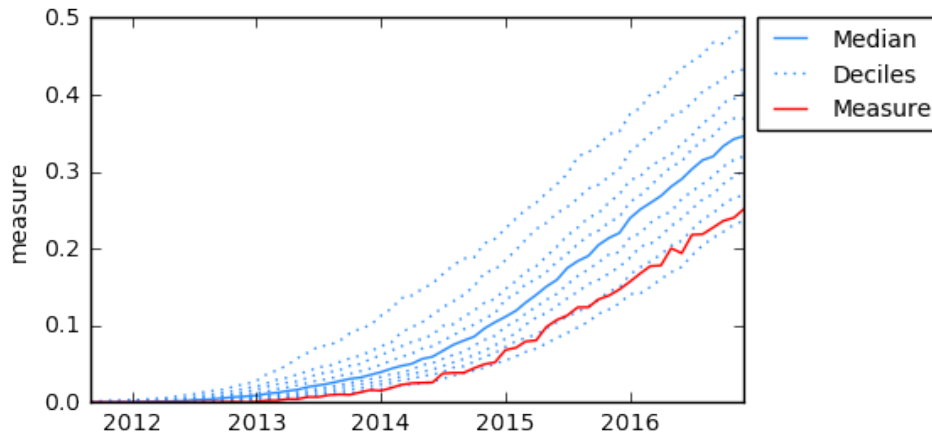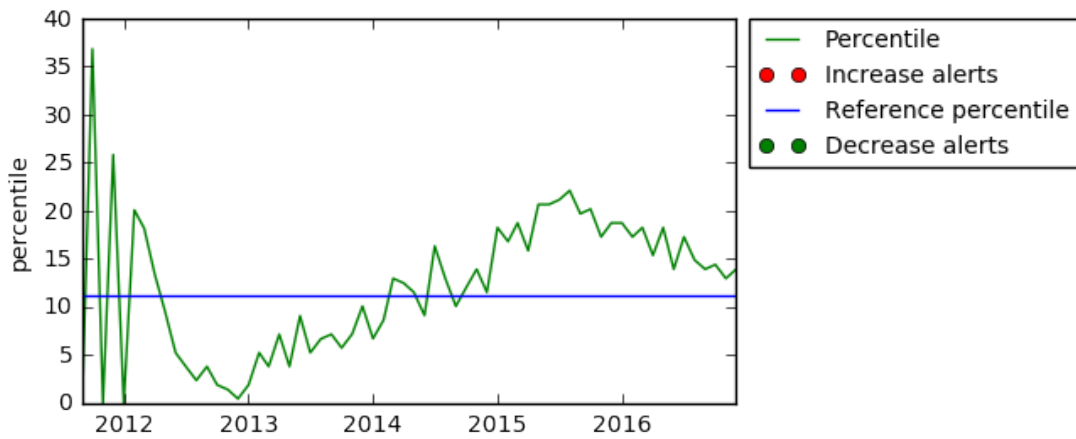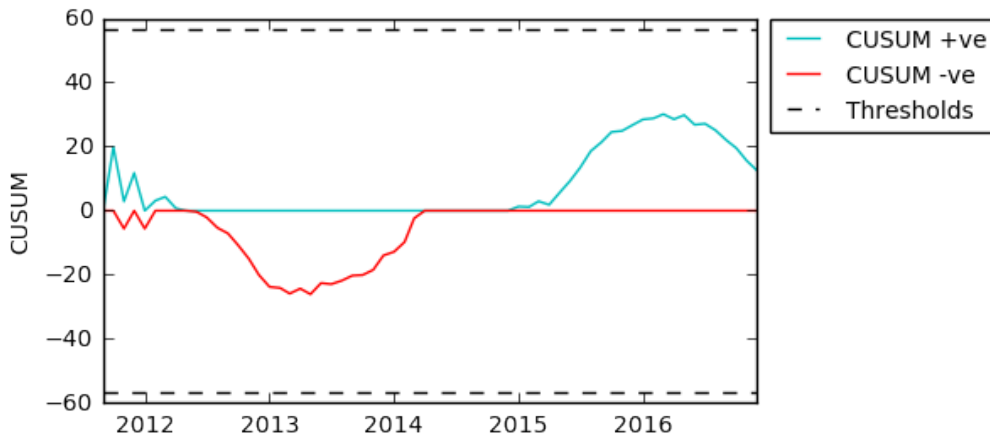

Measure: <https://openprescribing.net/practice/G85138/#doacs>

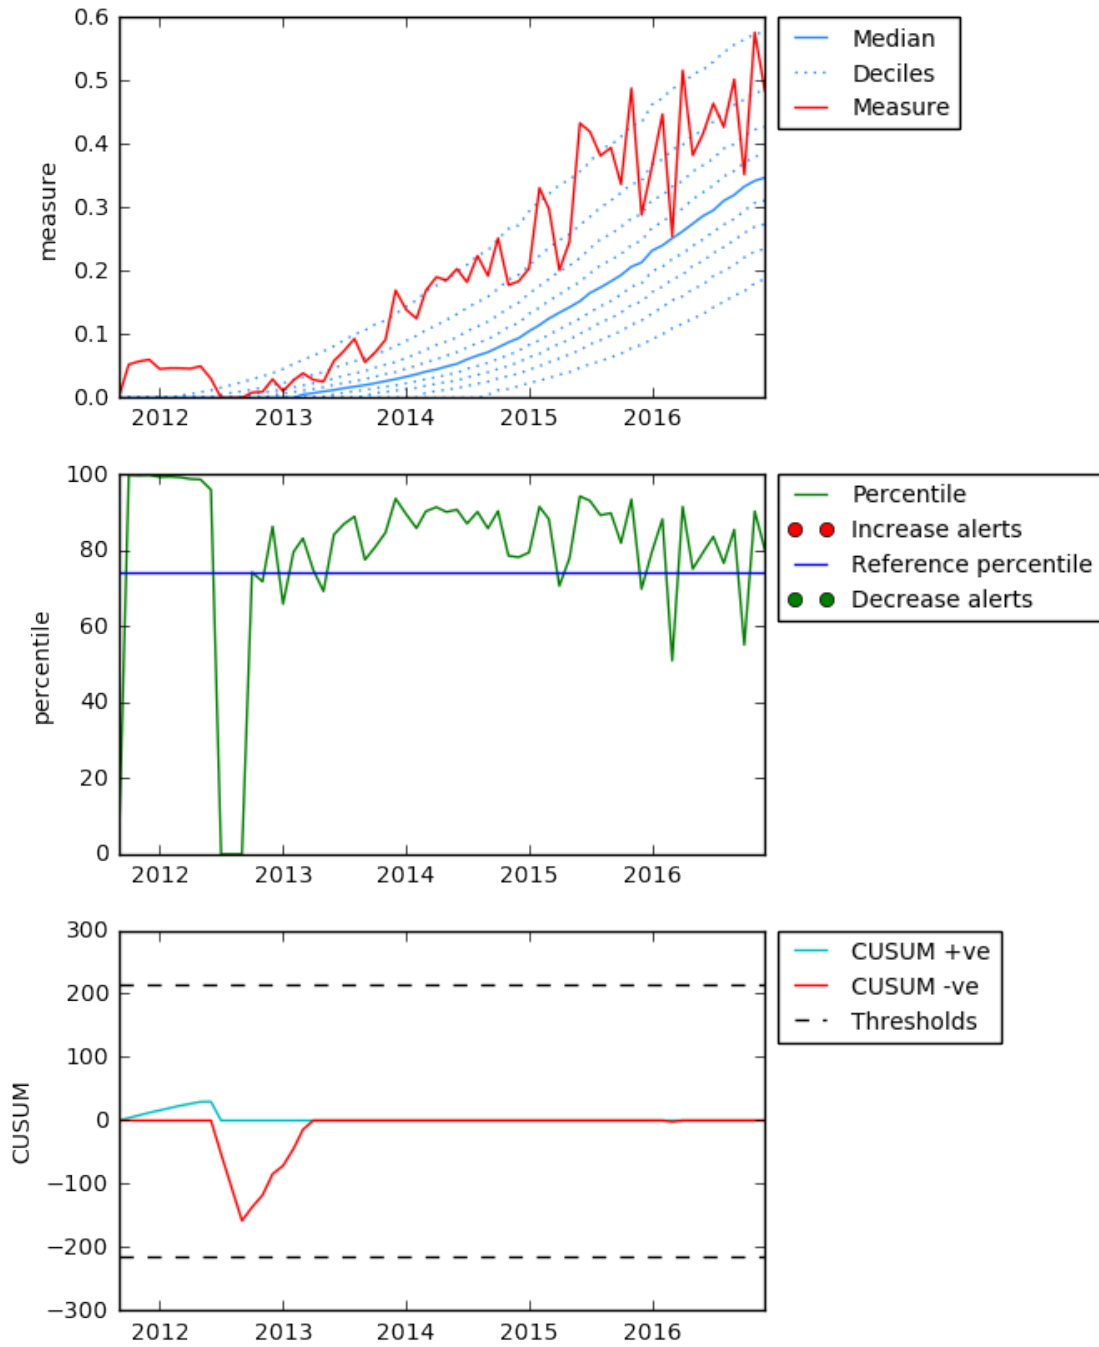

Measure: <https://openprescribing.net/ccg/05Y/#opioidper1000>

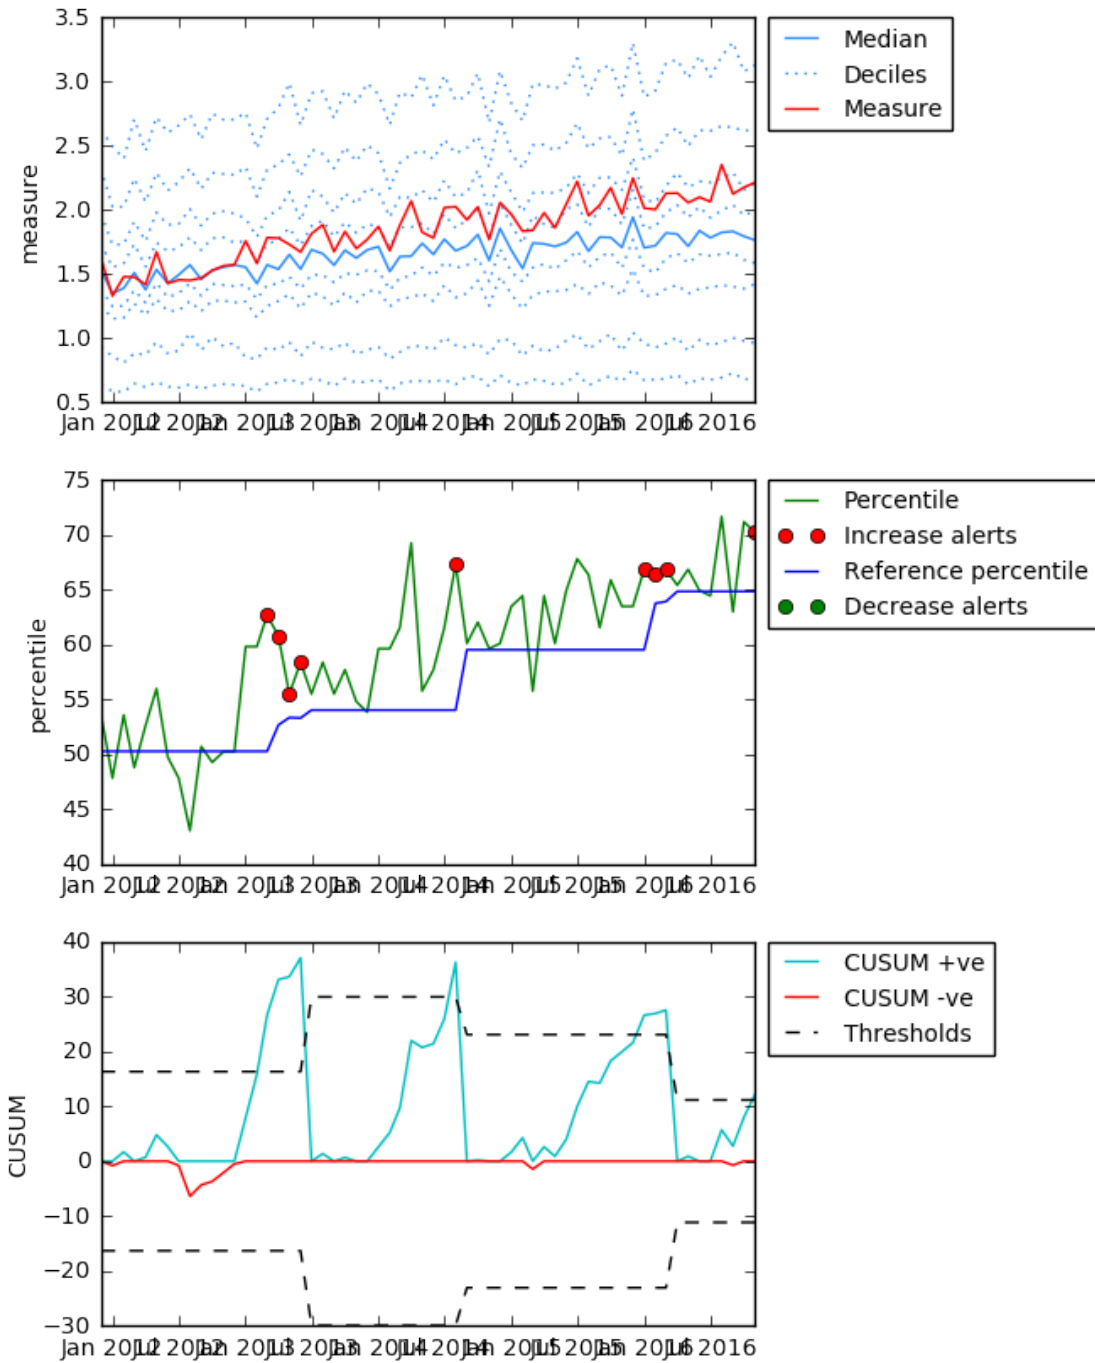

Measure: <https://openprescribing.net/practice/G85138/#opioidper1000>

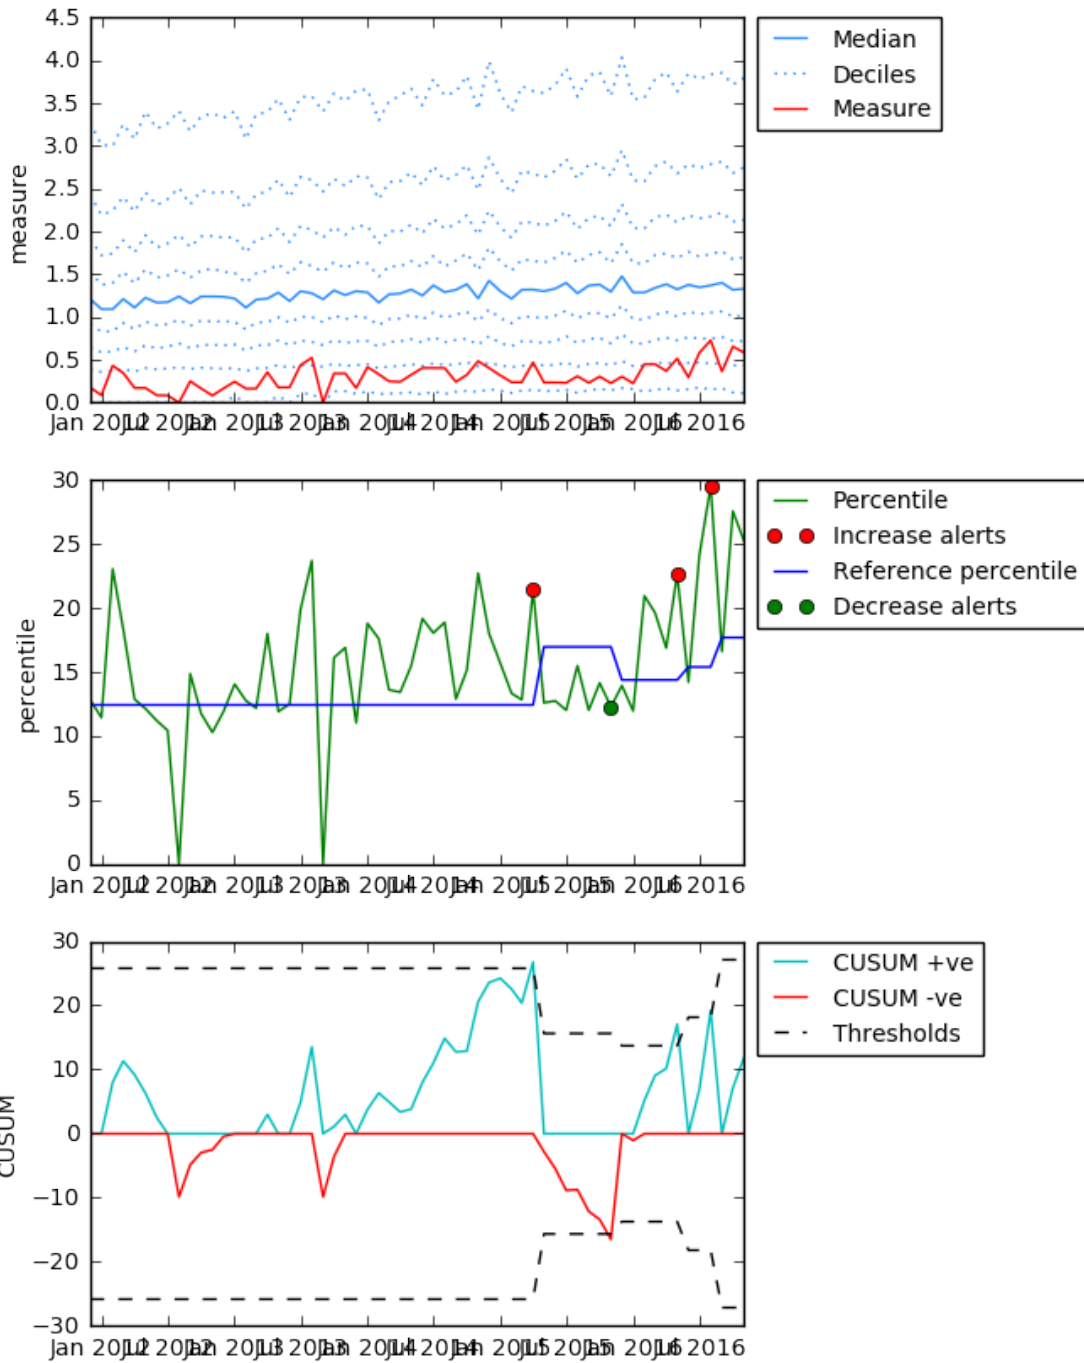

Measure: [https://openprescribing.net/ccg/05Y/#ktt12\\_diabetes\\_insulin](https://openprescribing.net/ccg/05Y/#ktt12_diabetes_insulin)

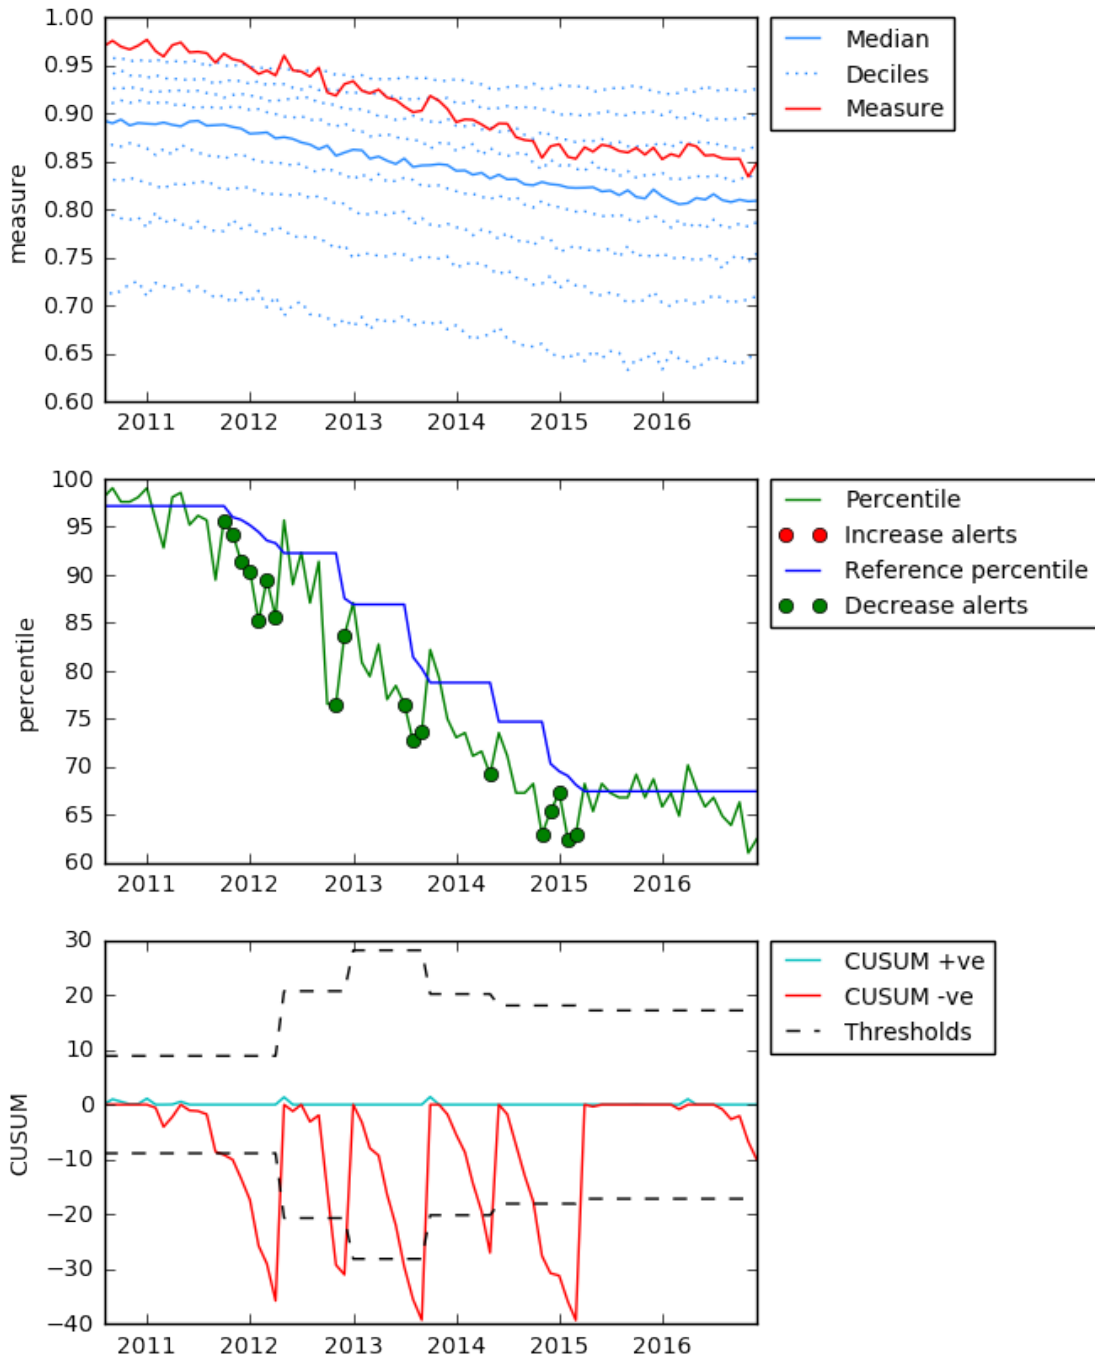

Measure: [https://openprescribing.net/practice/G85138/#ktt12\\_diabetes\\_insulin](https://openprescribing.net/practice/G85138/#ktt12_diabetes_insulin)

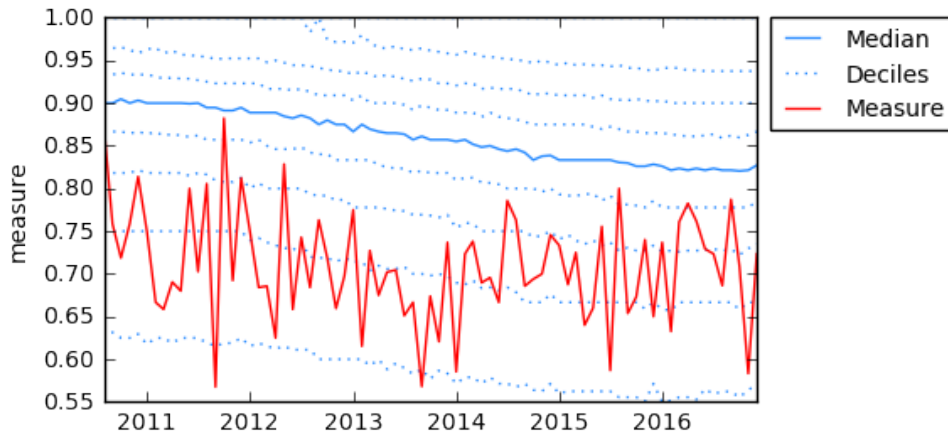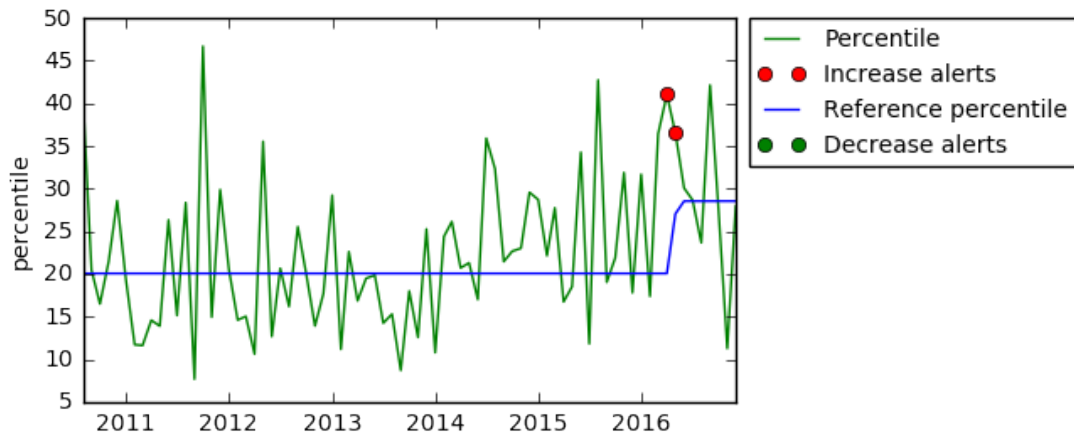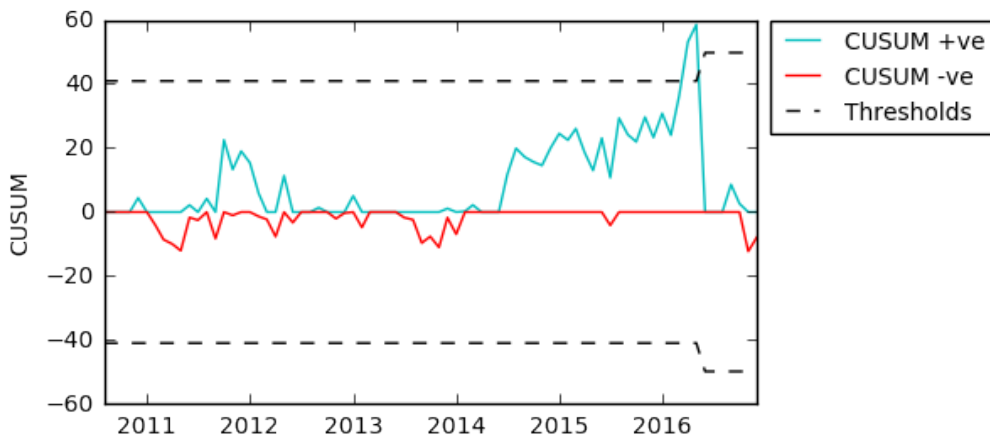

Measure: [https://openprescribing.net/ccg/05Y/#ktt9\\_antibiotics](https://openprescribing.net/ccg/05Y/#ktt9_antibiotics)

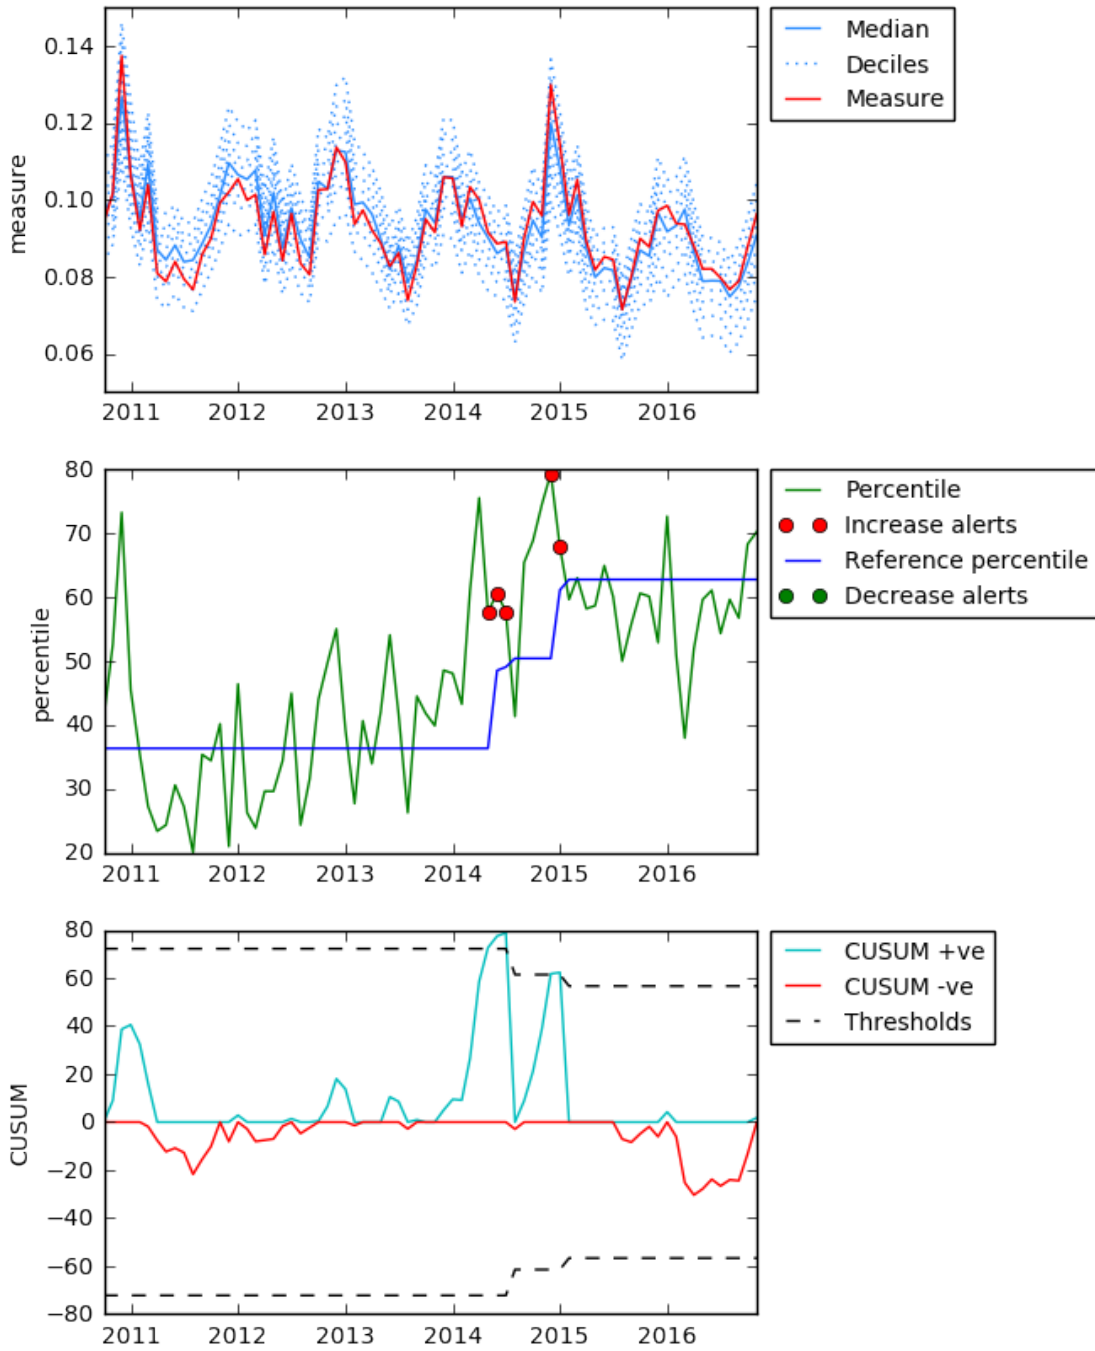

Measure: [https://openprescribing.net/practice/G85138/#ktt9\\_antibiotics](https://openprescribing.net/practice/G85138/#ktt9_antibiotics)

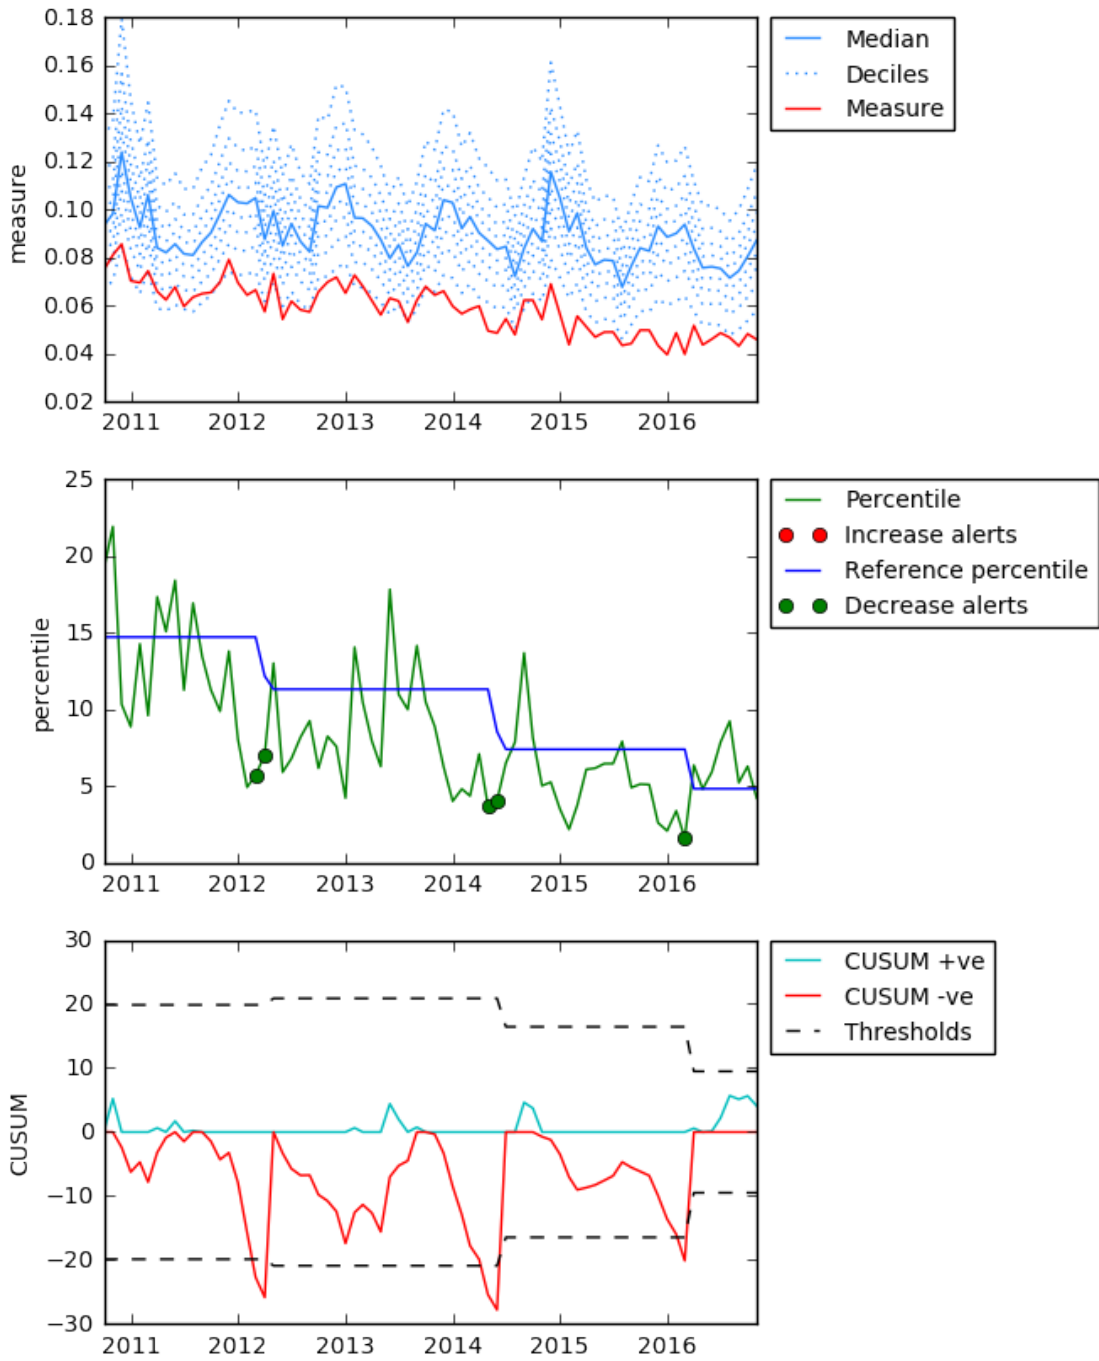



Measure: <https://openprescribing.net/ccg/05Y/#pregabalin>

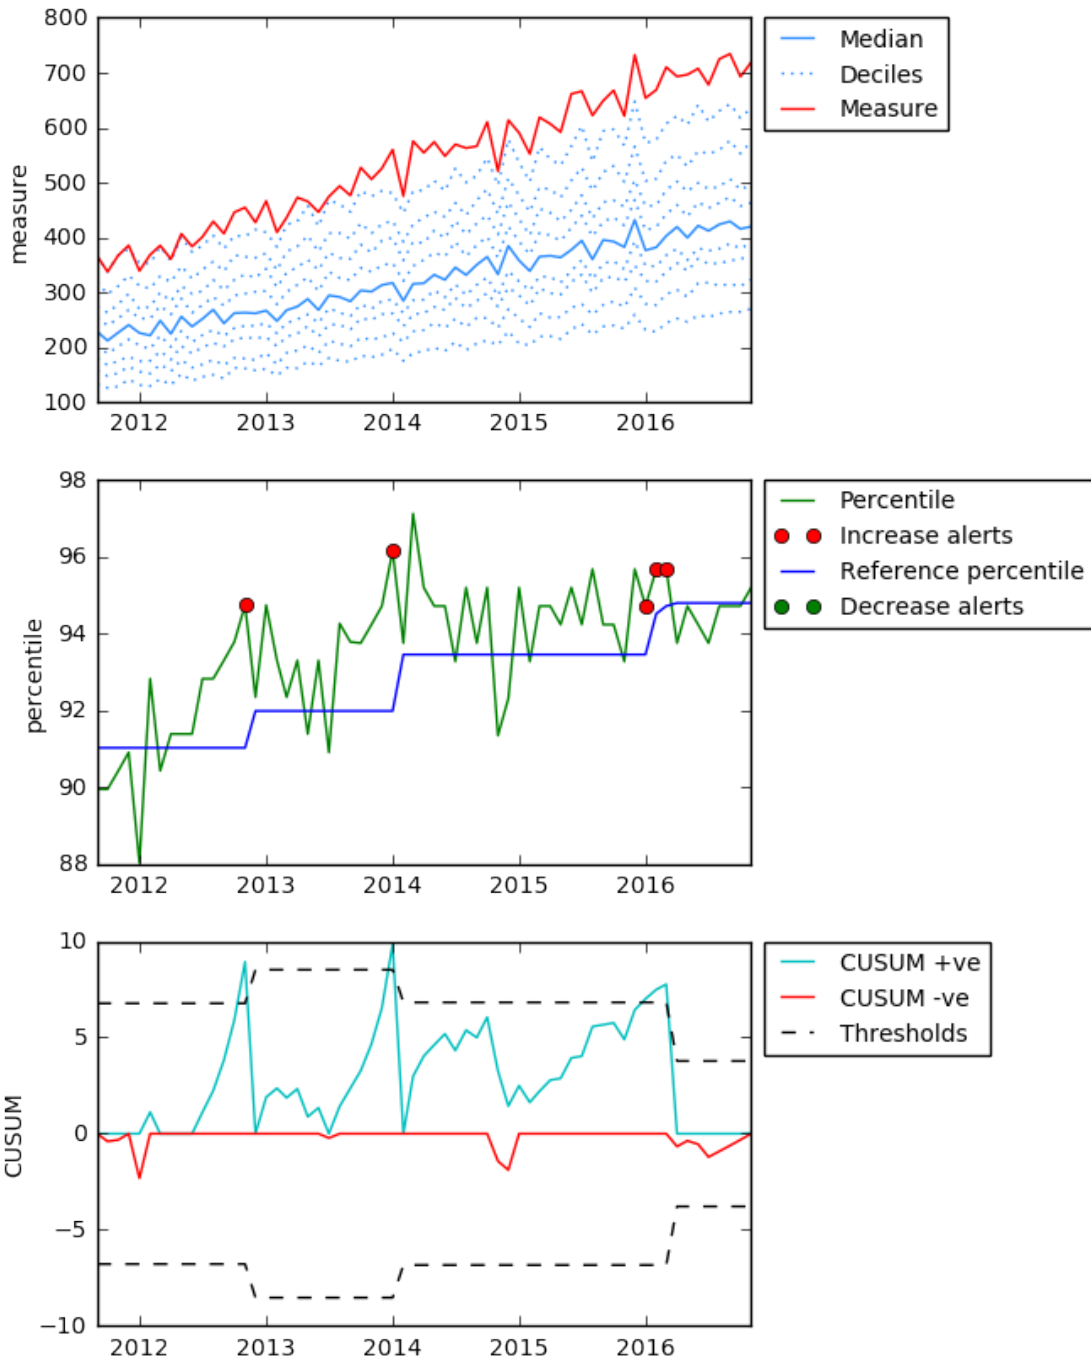

Measure: <https://openprescribing.net/practice/G85138/#pregabalin>

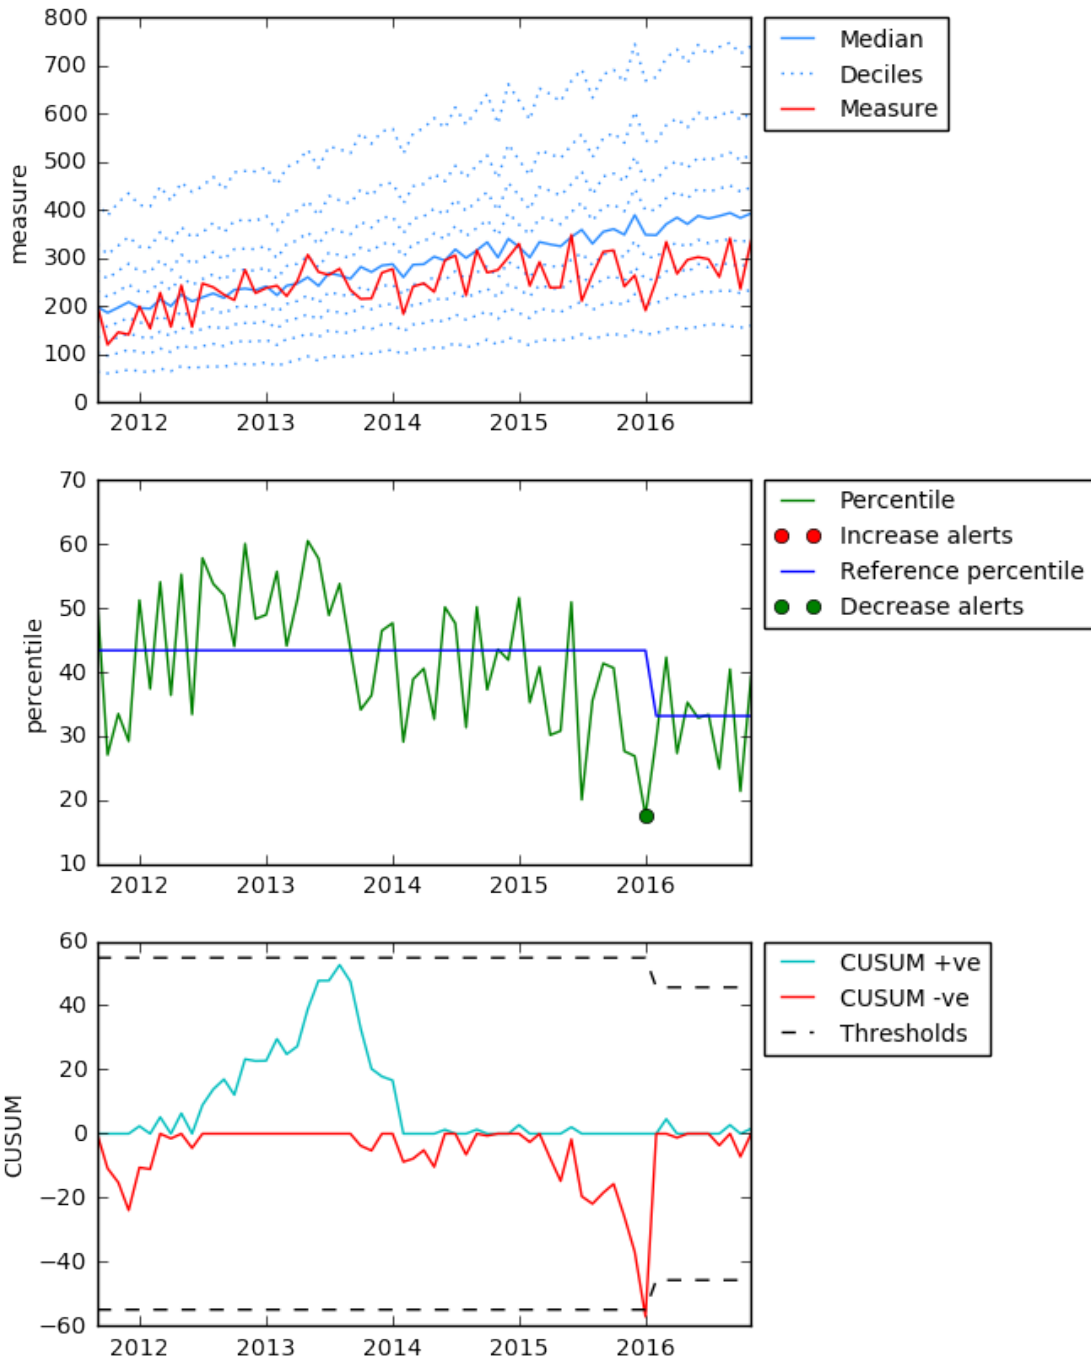

Measure: <https://openprescribing.net/ccg/05Y/#diltiazem>

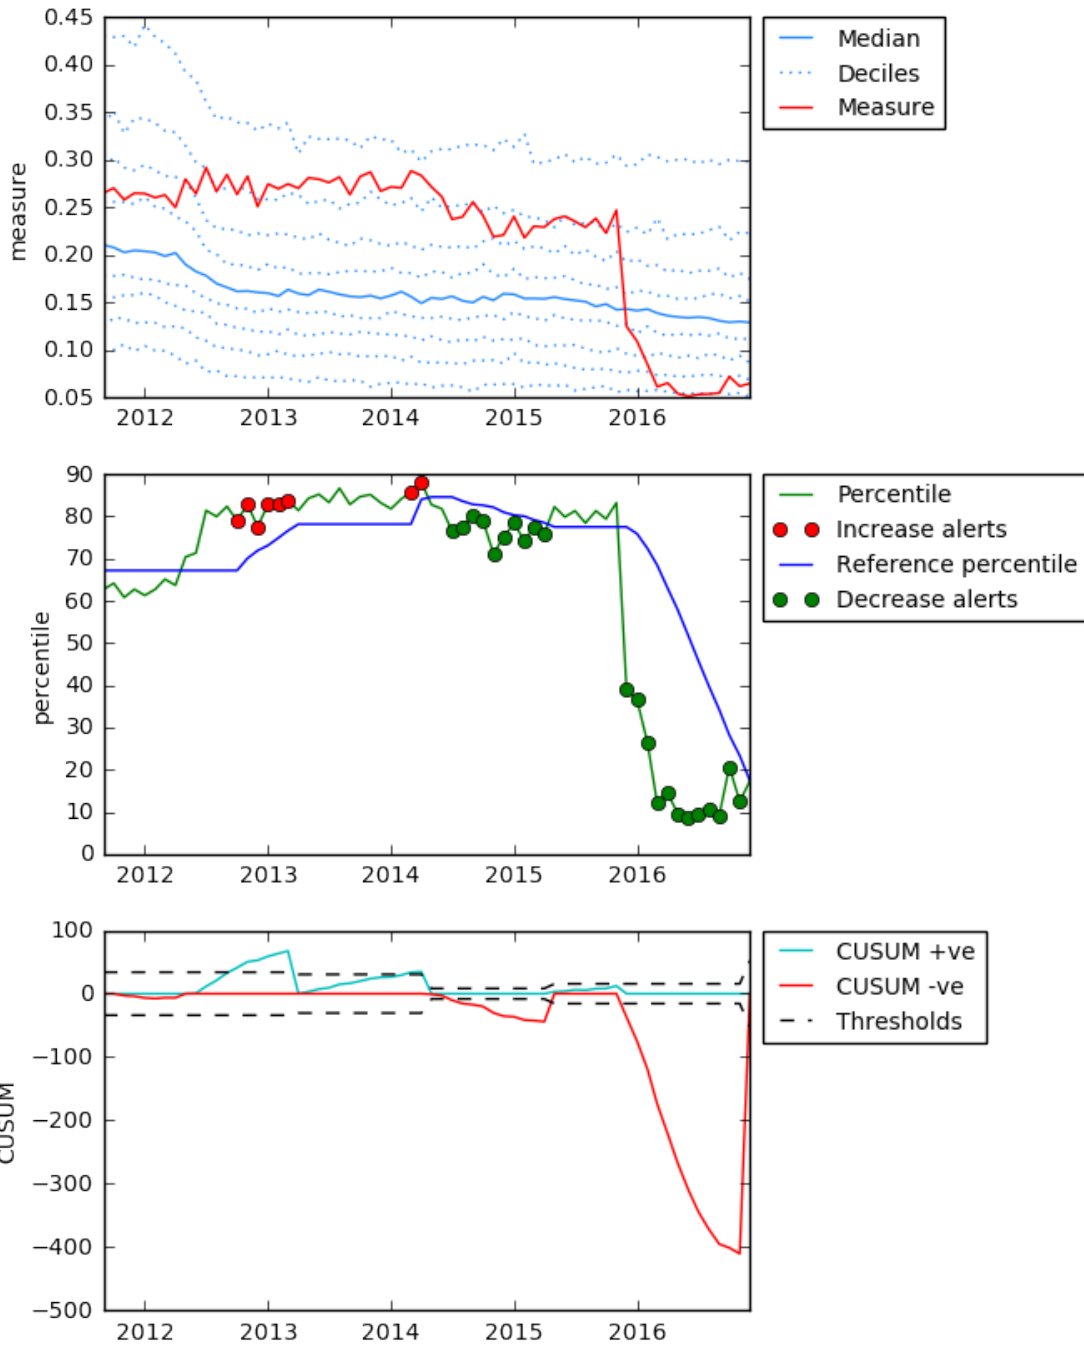

Measure: <https://openprescribing.net/practice/G85138/#diltiazem>

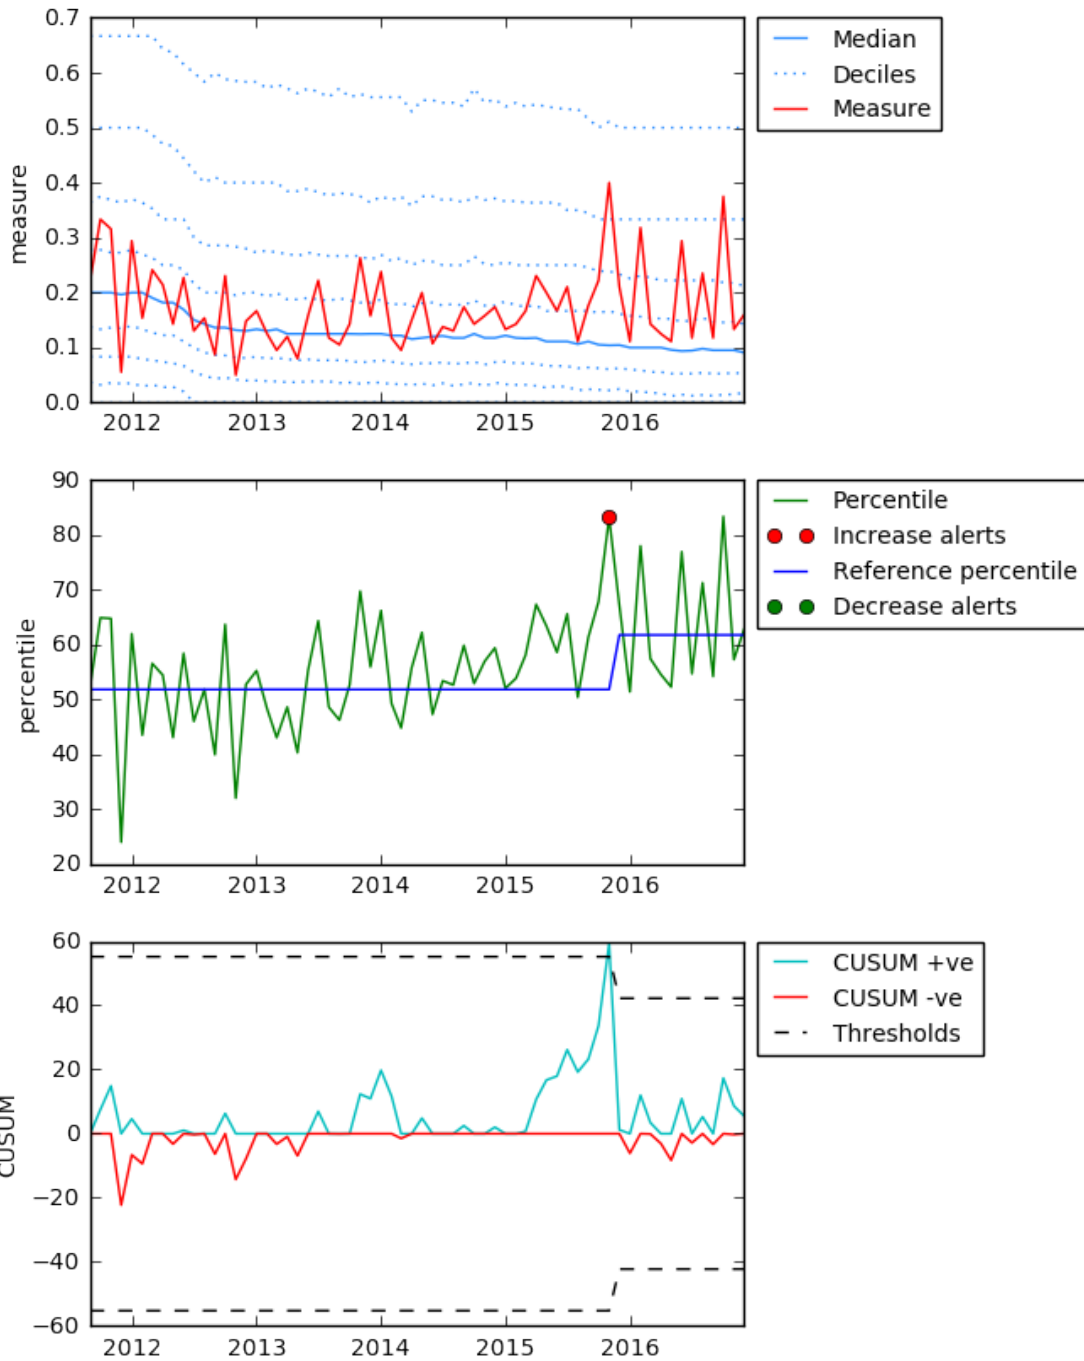

Measure: <https://openprescribing.net/ccg/05Y/#coproxamol>

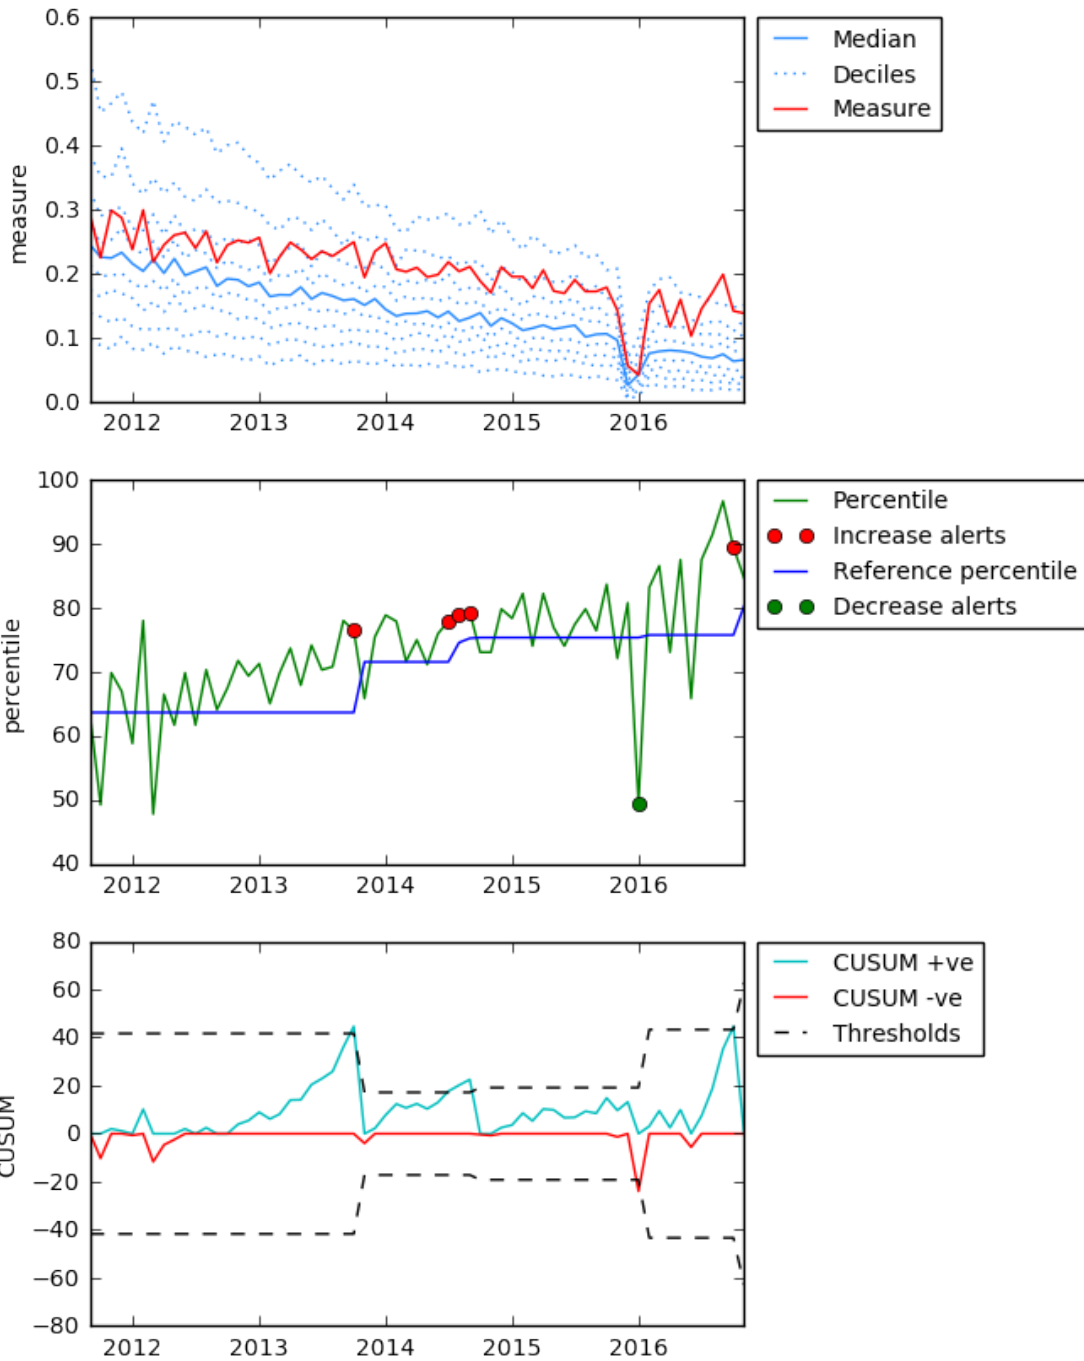

Measure: <https://openprescribing.net/practice/G85138/#coproxamol>

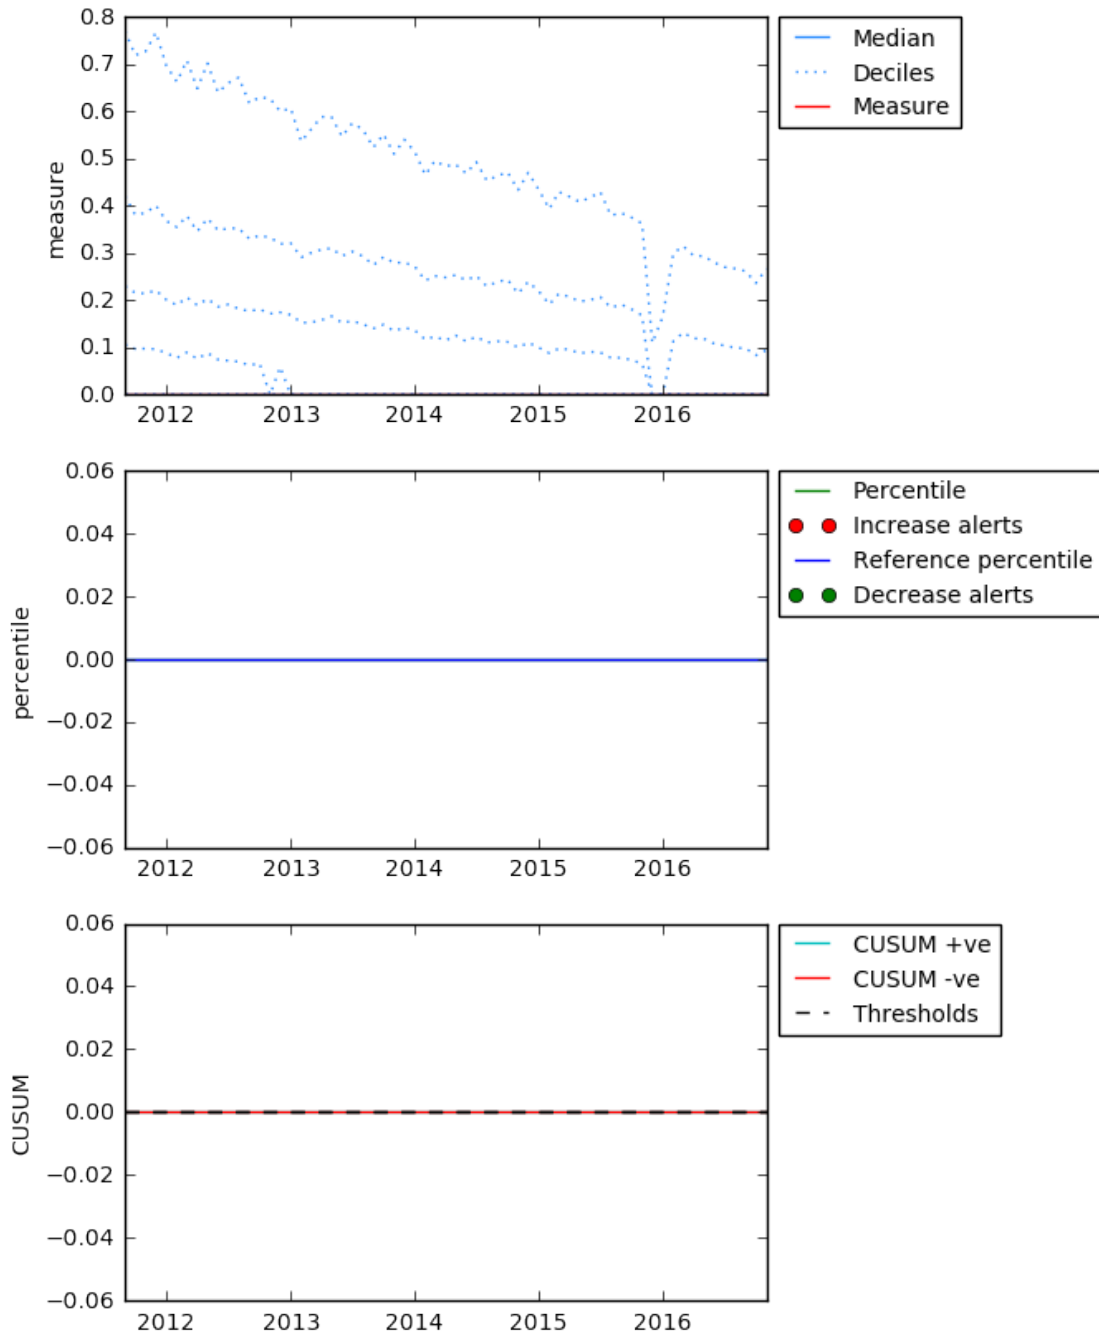

Measure: <https://openprescribing.net/ccg/05Y/#opiates>

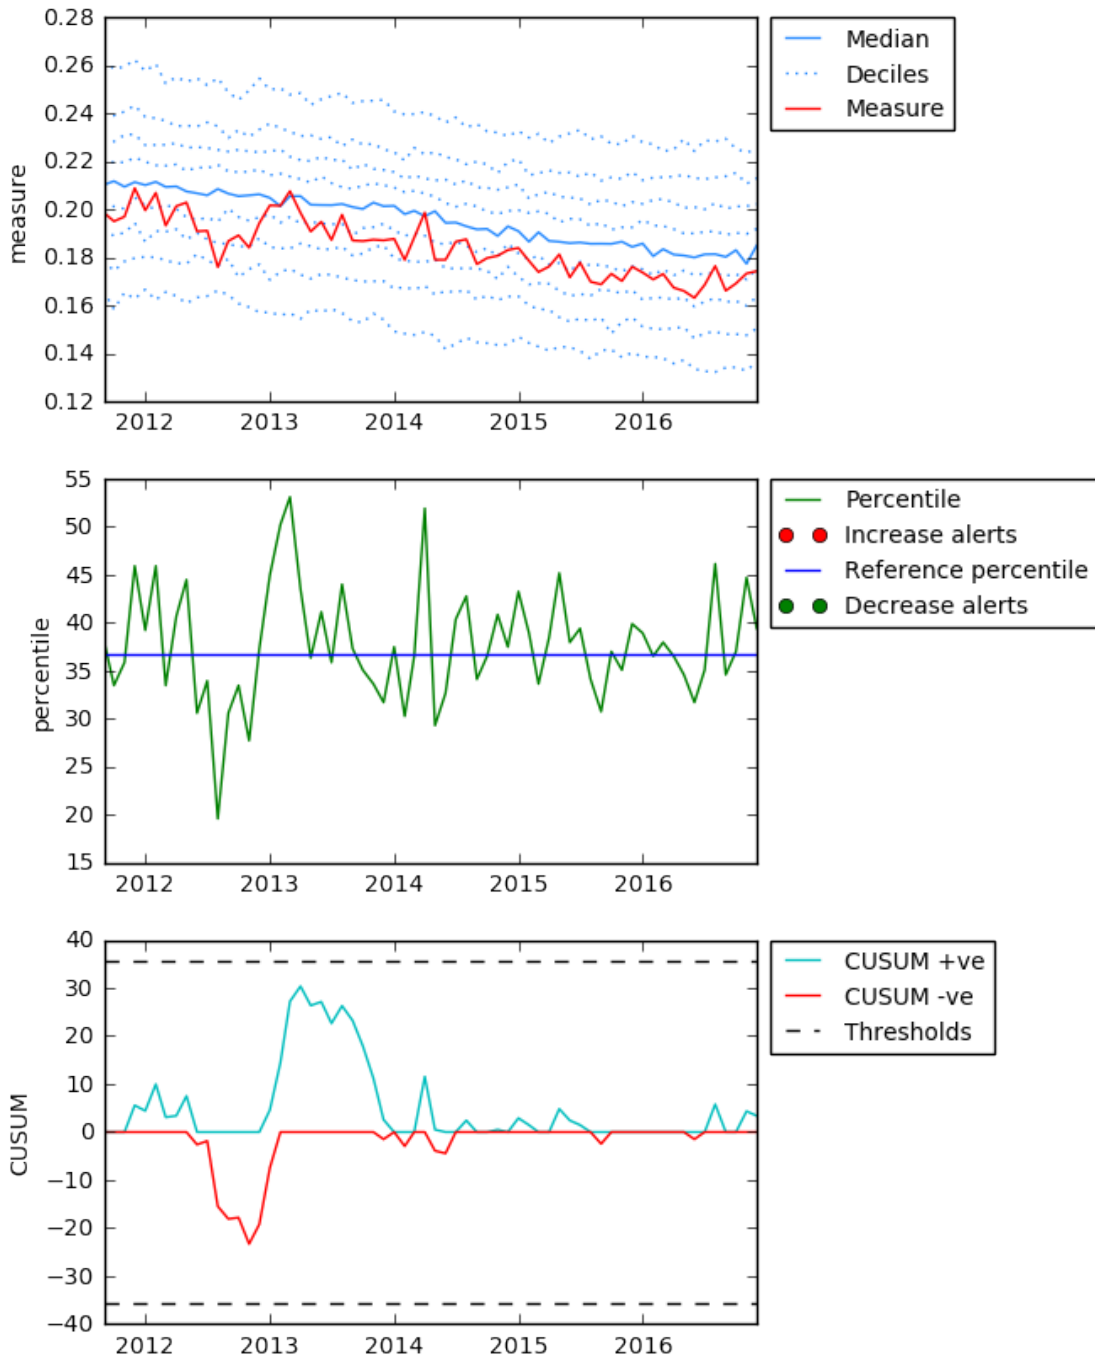

Measure: <https://openprescribing.net/practice/G85138/#opiates>

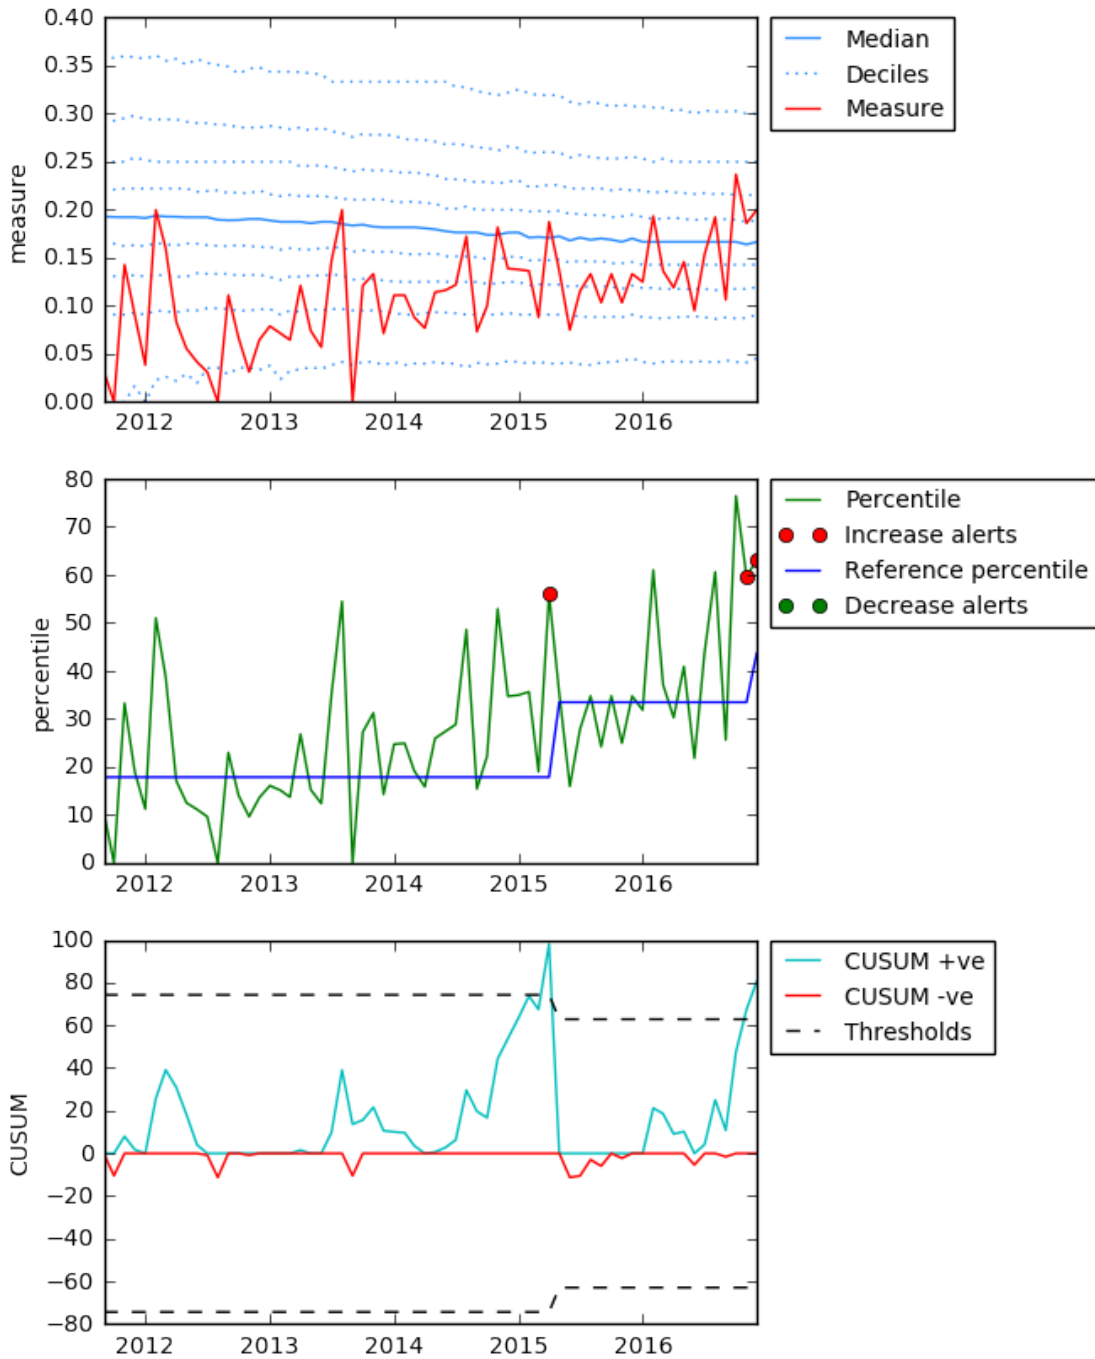



Measure: <https://openprescribing.net/ccg/05Y/#ciclosporin>

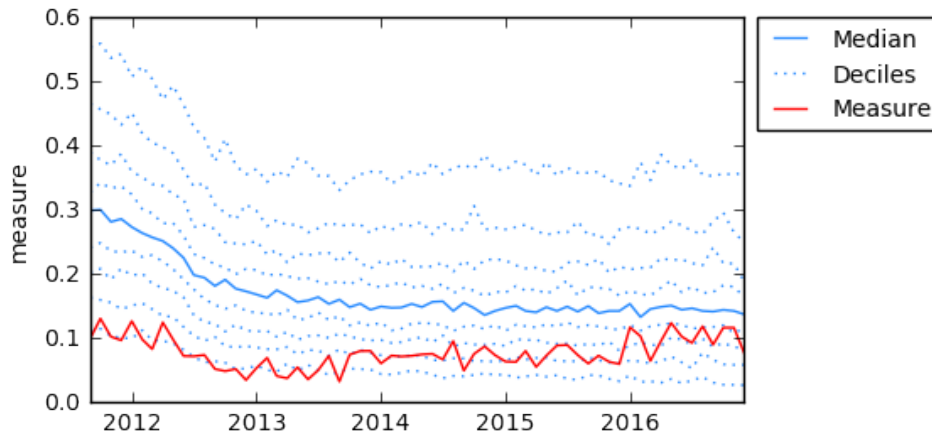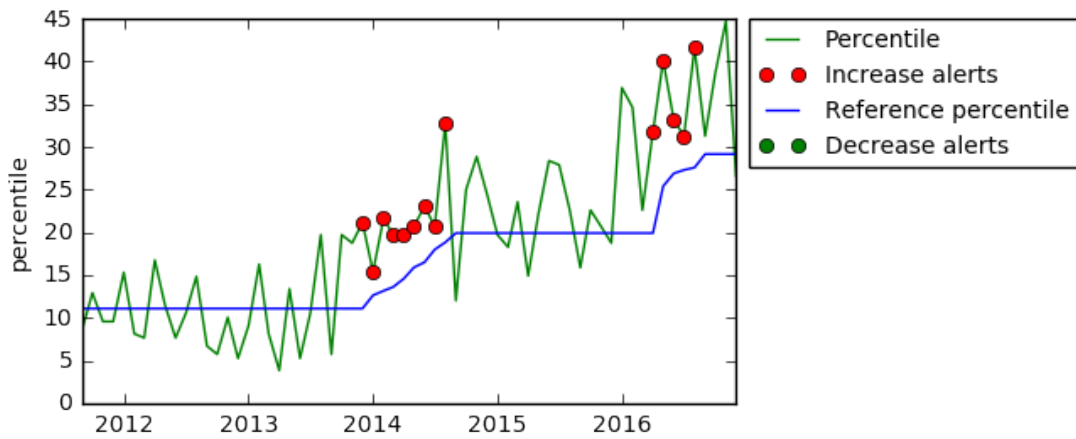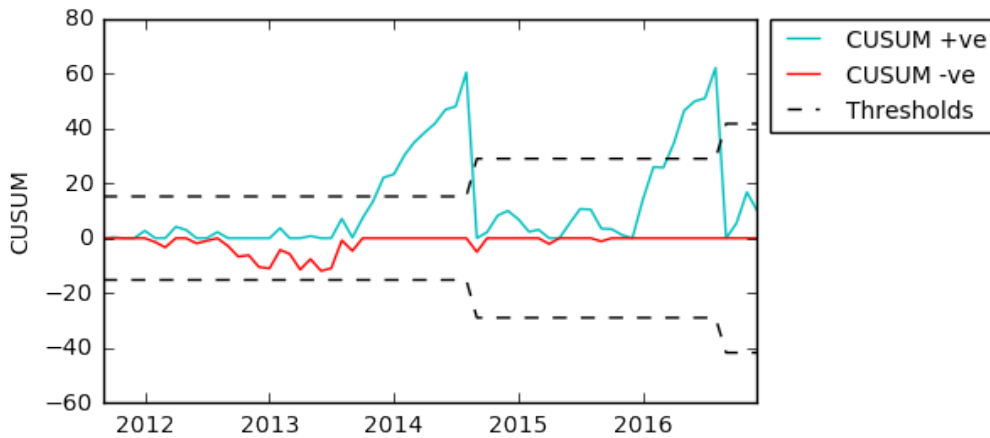

Measure: <https://openprescribing.net/practice/G85138/#ciclosporin>

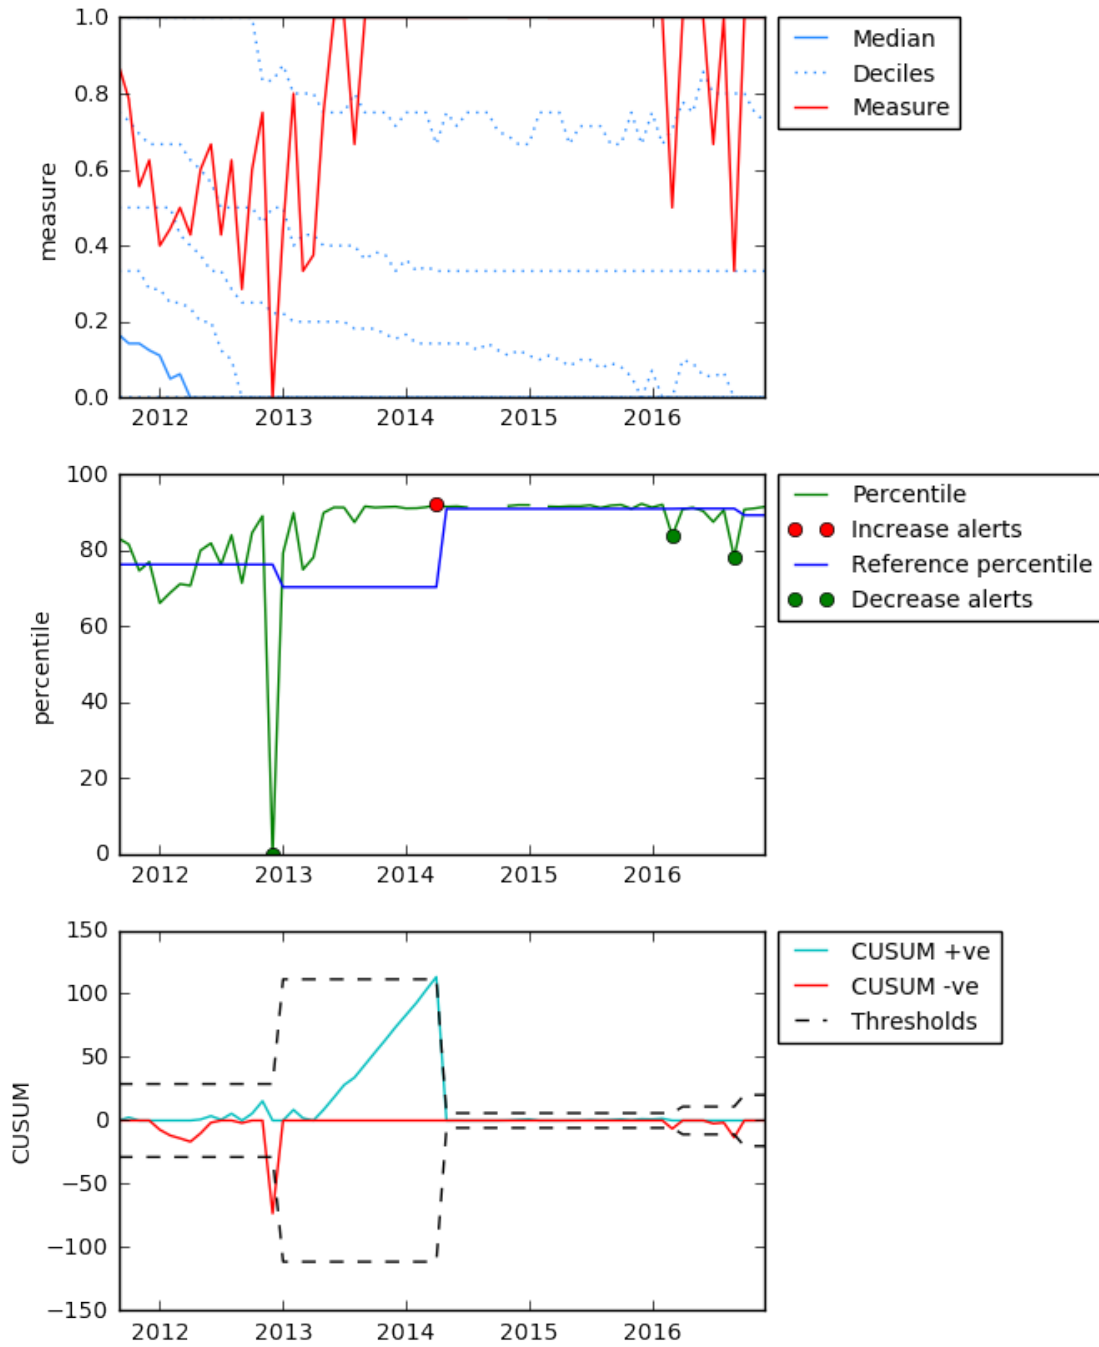

Measure: <https://openprescribing.net/ccg/05Y/#cerazette>

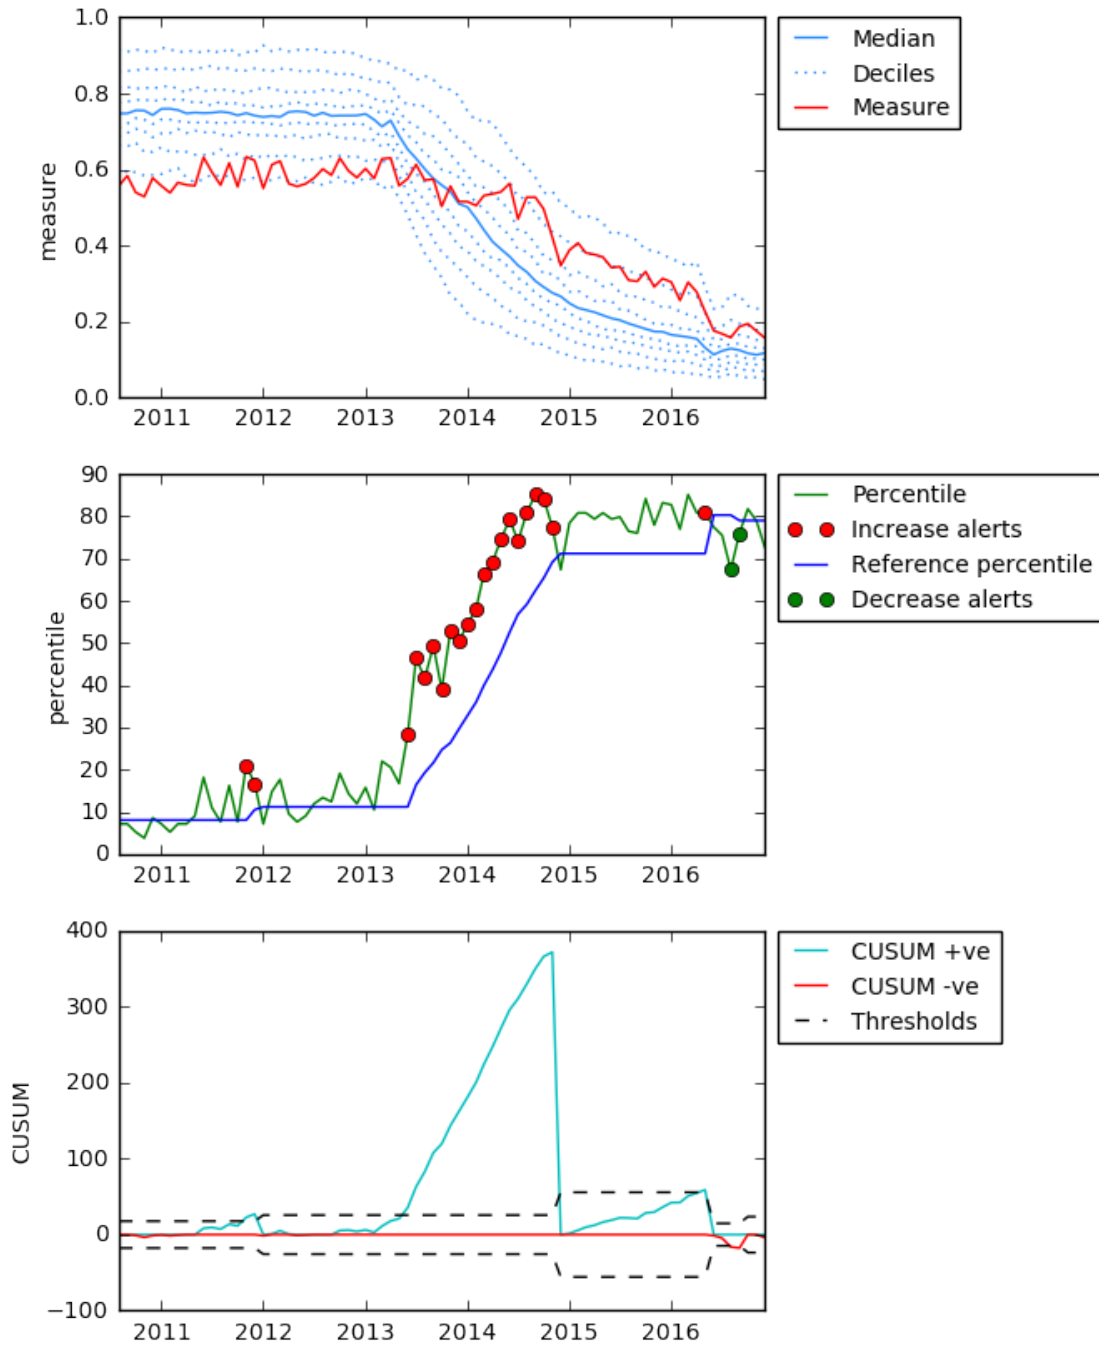

Measure: <https://openprescribing.net/practice/G85138/#cerazette>

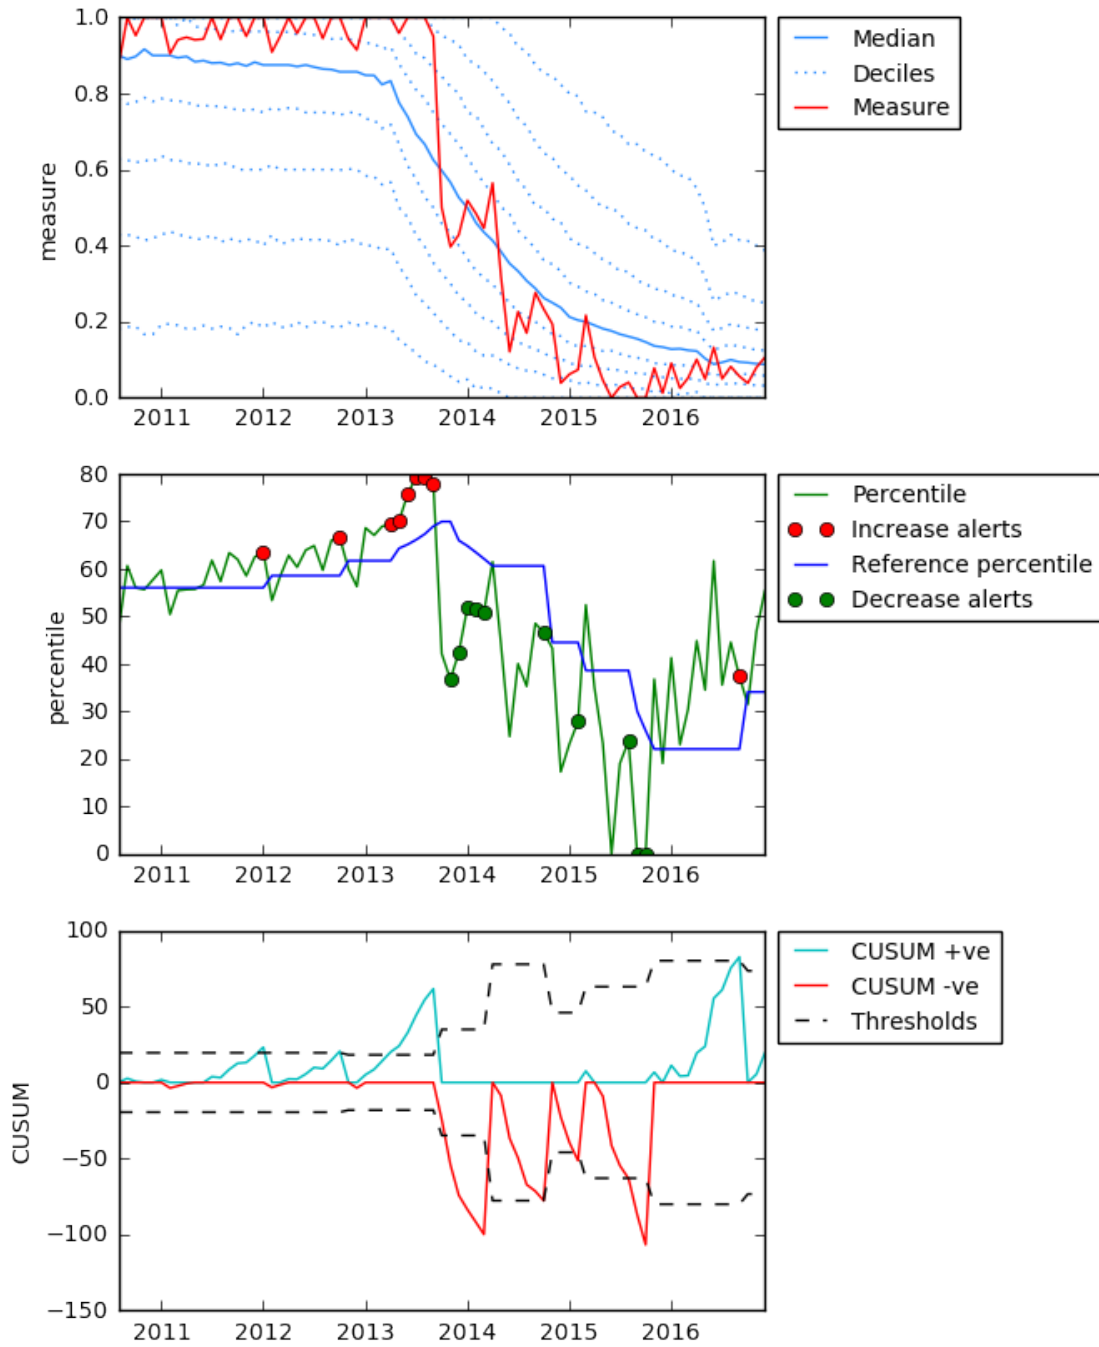

Measure: <https://openprescribing.net/ccg/05Y/#neбиволol>

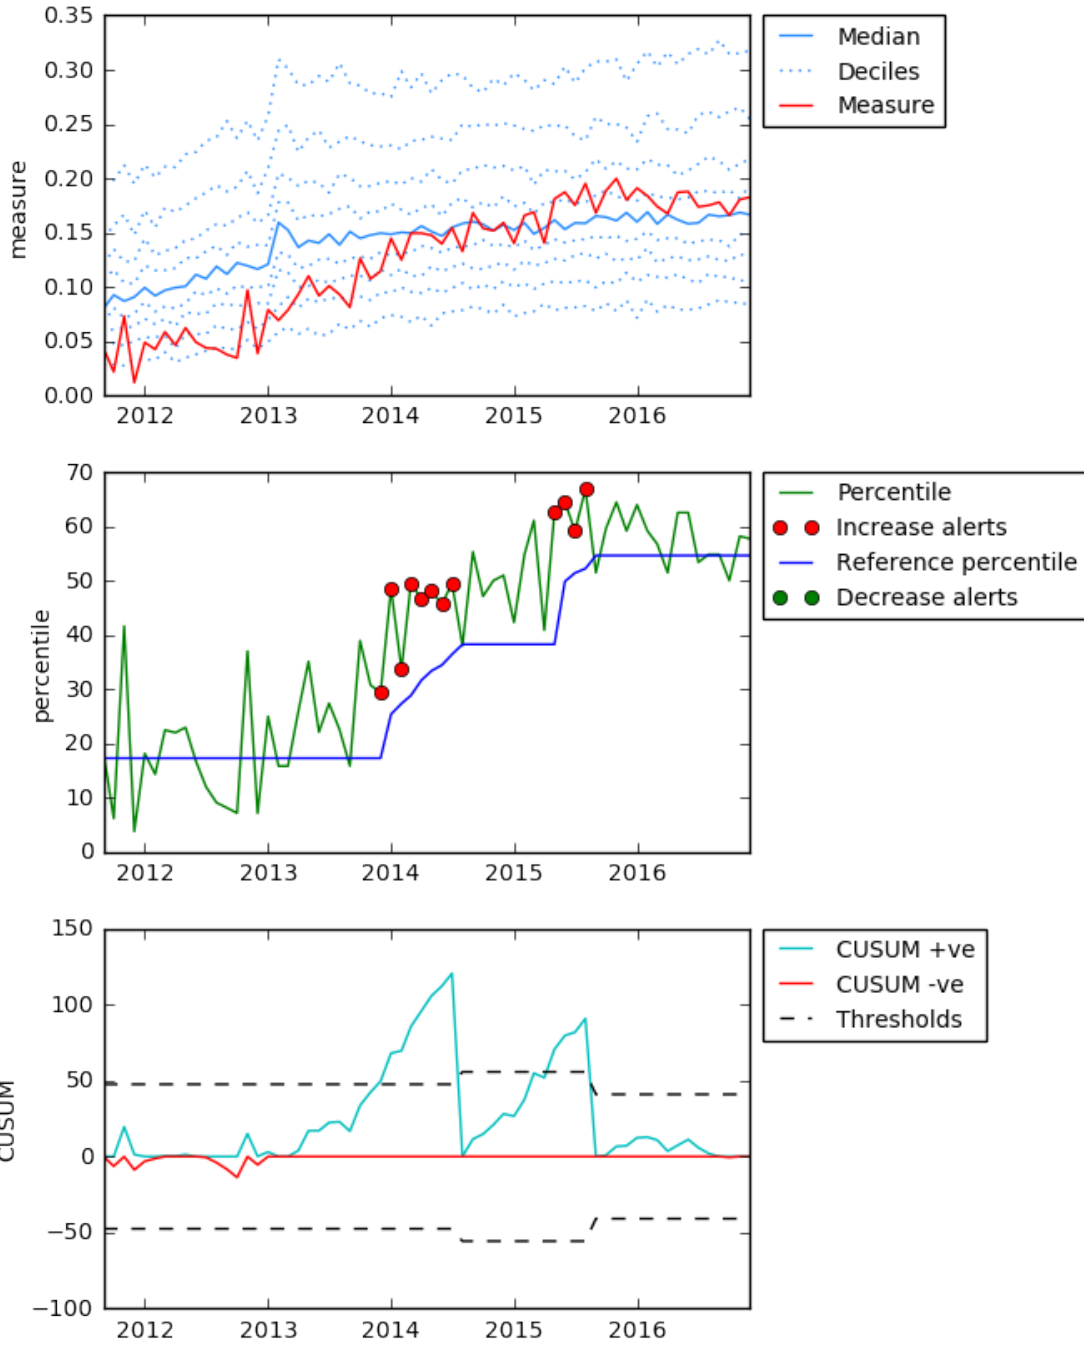

Measure: <https://openprescribing.net/practice/G85138/#nebivolol>

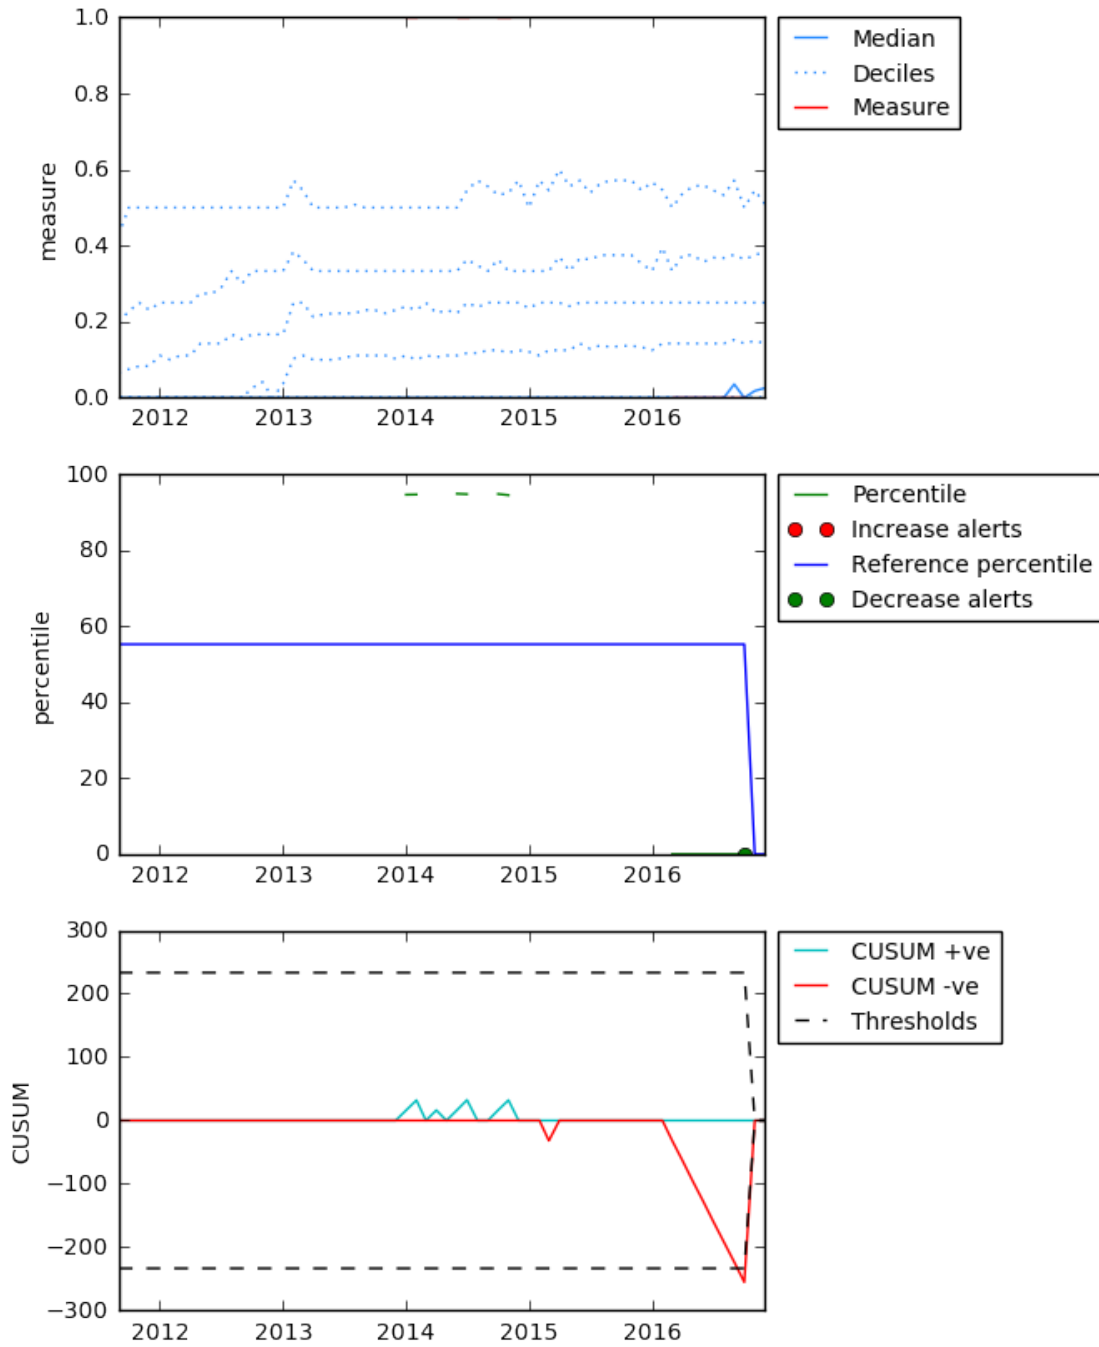

Measure: [https://openprescribing.net/ccg/05Y/#ktt9\\_uti\\_antibiotics](https://openprescribing.net/ccg/05Y/#ktt9_uti_antibiotics)

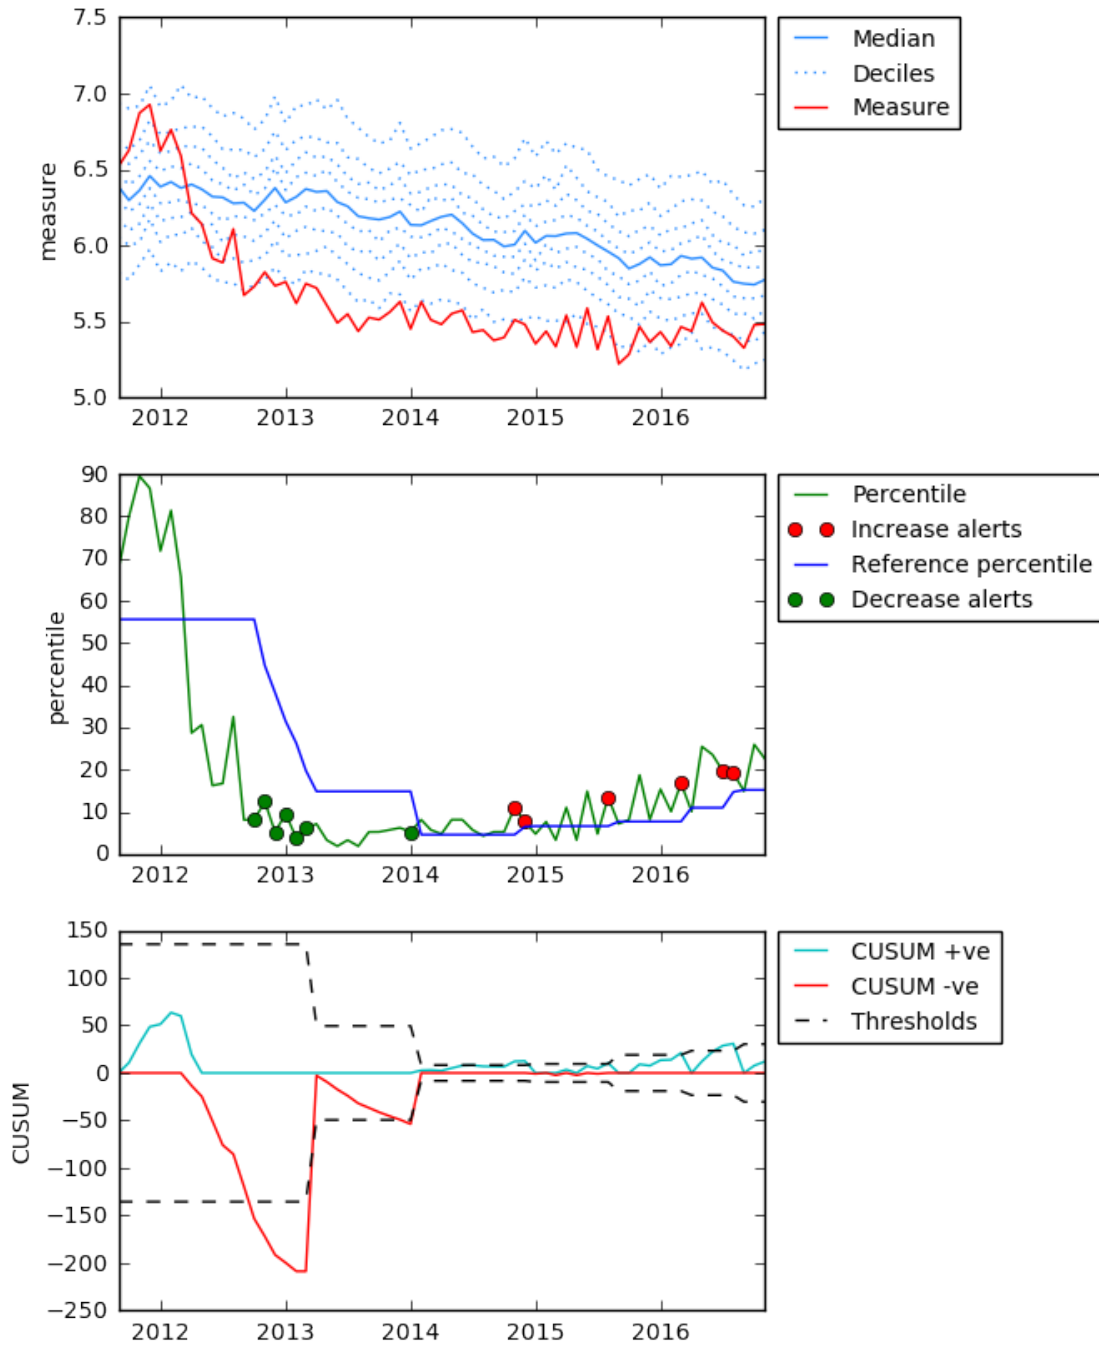

Measure: [https://openprescribing.net/practice/G85138/#ktt9\\_uti\\_antibiotics](https://openprescribing.net/practice/G85138/#ktt9_uti_antibiotics)

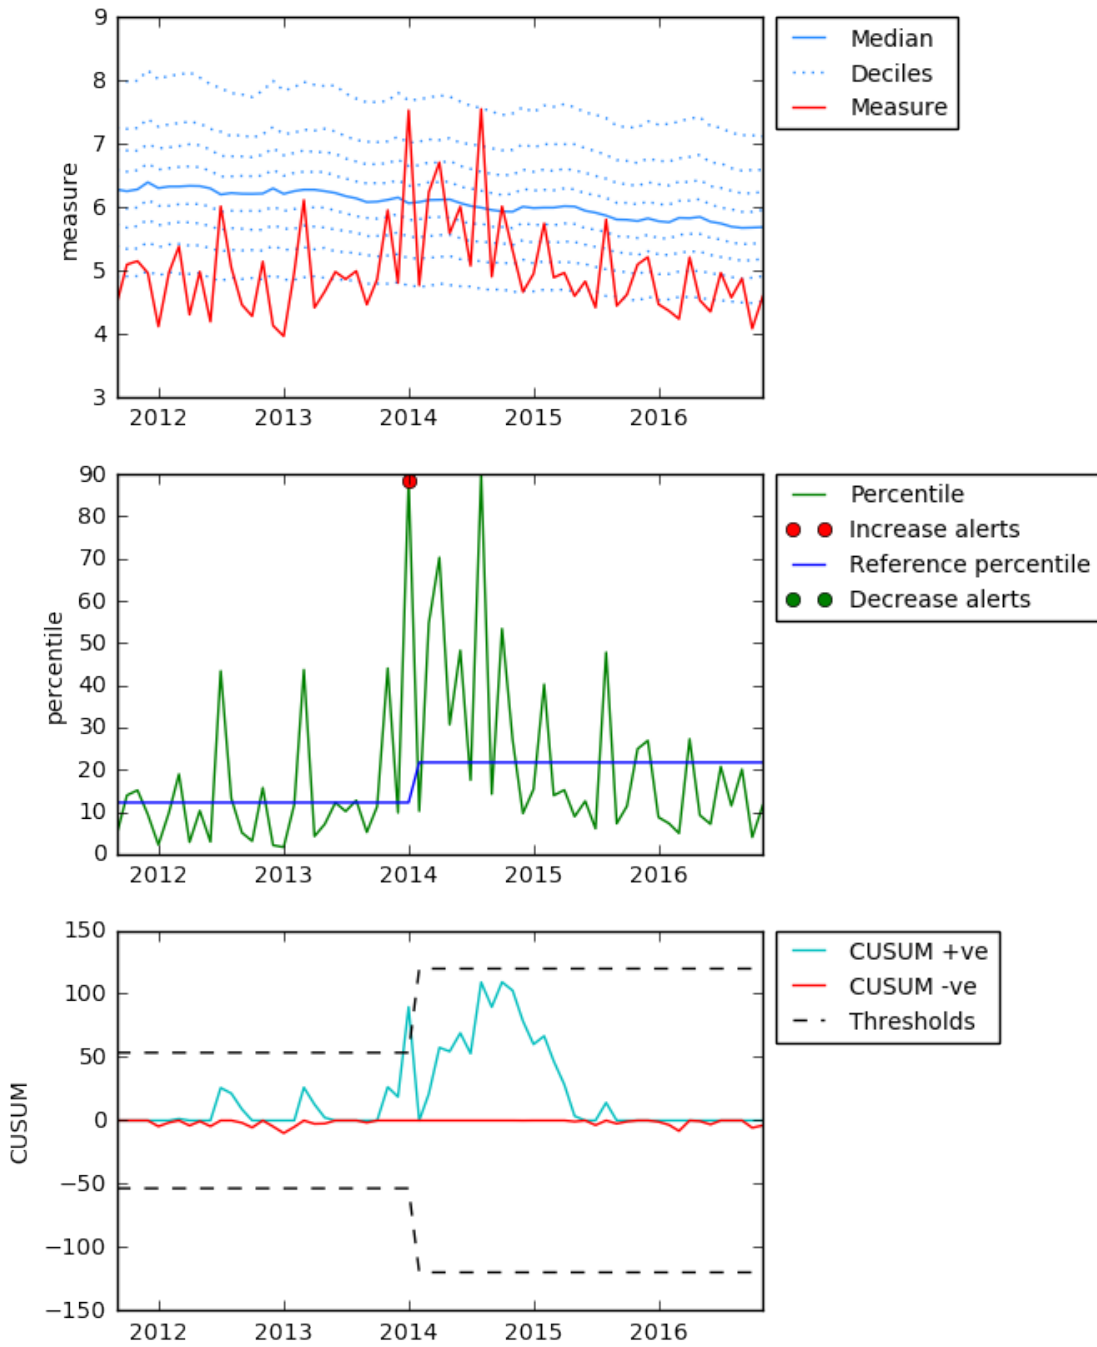



Measure: <https://openprescribing.net/ccg/05Y/#ace>

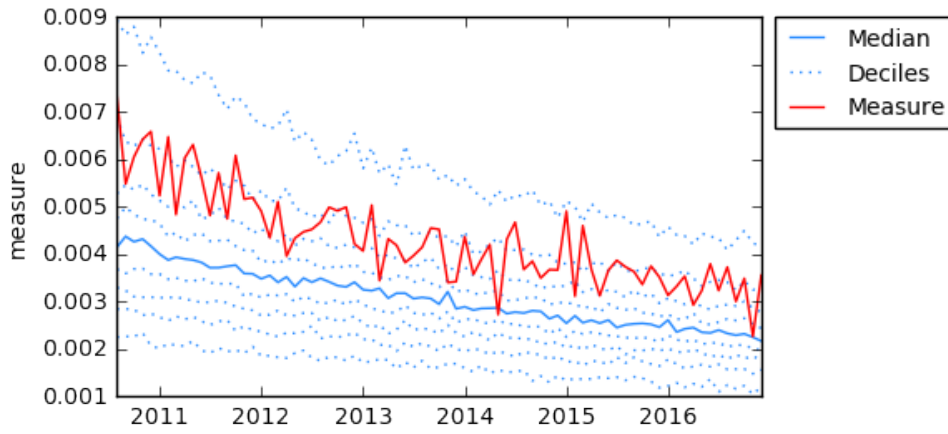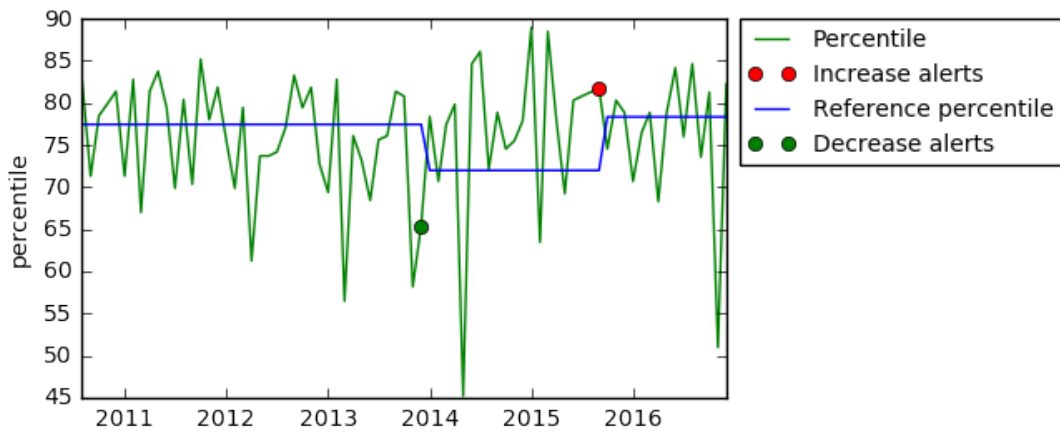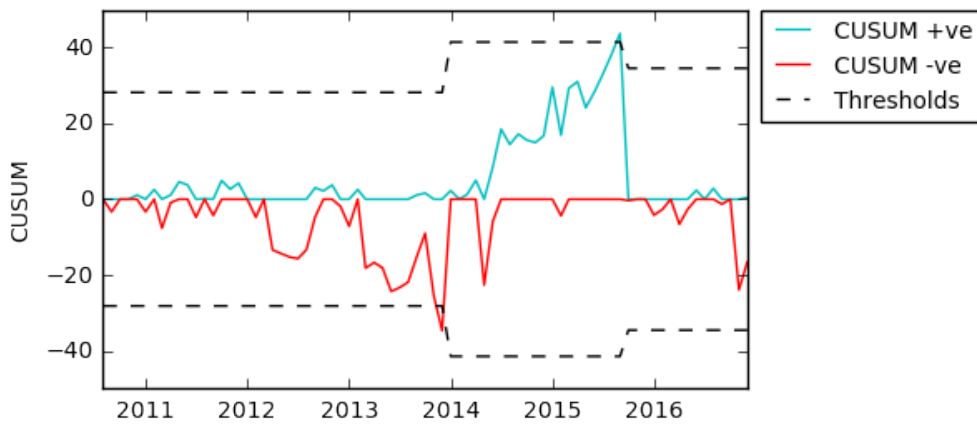

Measure: <https://openprescribing.net/practice/G85138/#ace>

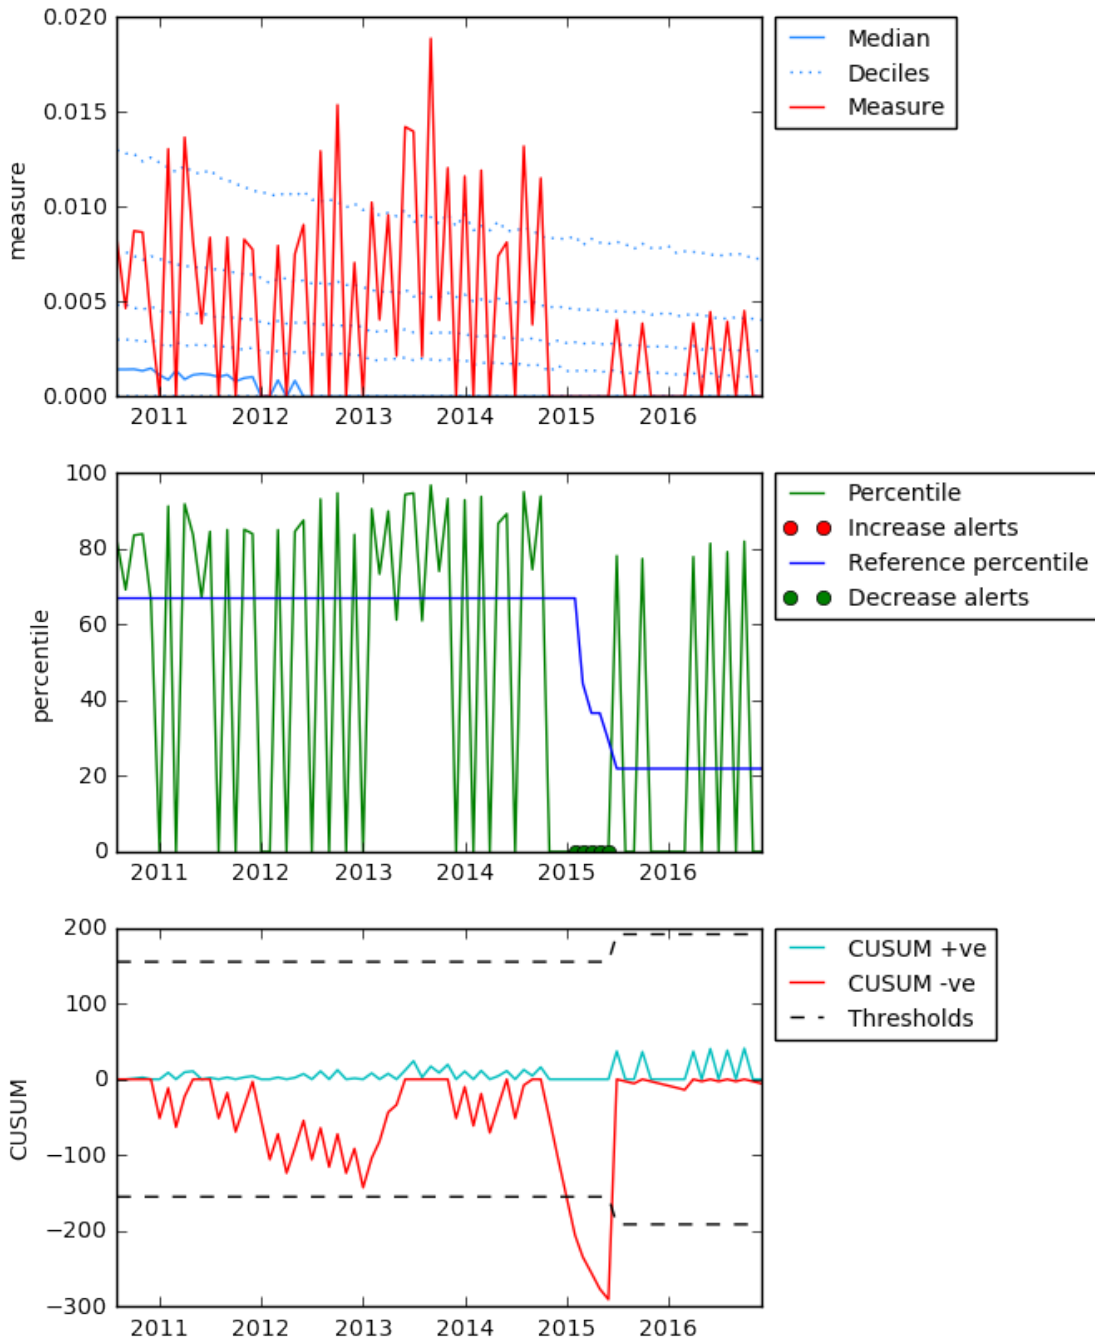

Measure: <https://openprescribing.net/ccg/05Y/#statins>

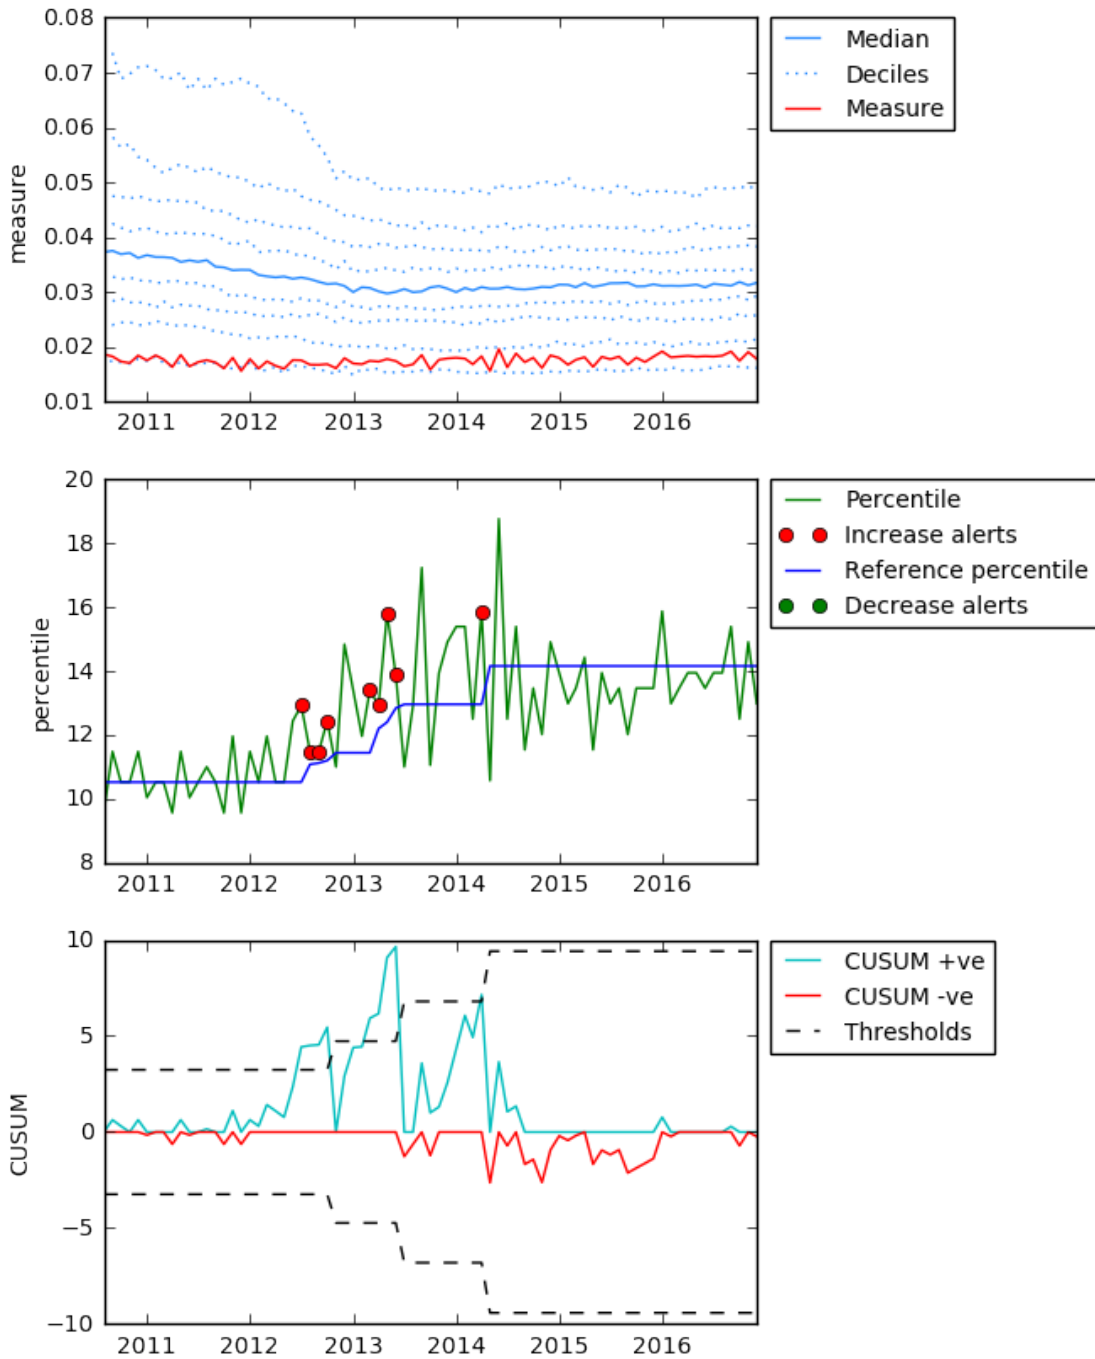

Measure: <https://openprescribing.net/practice/G85138/#statins>

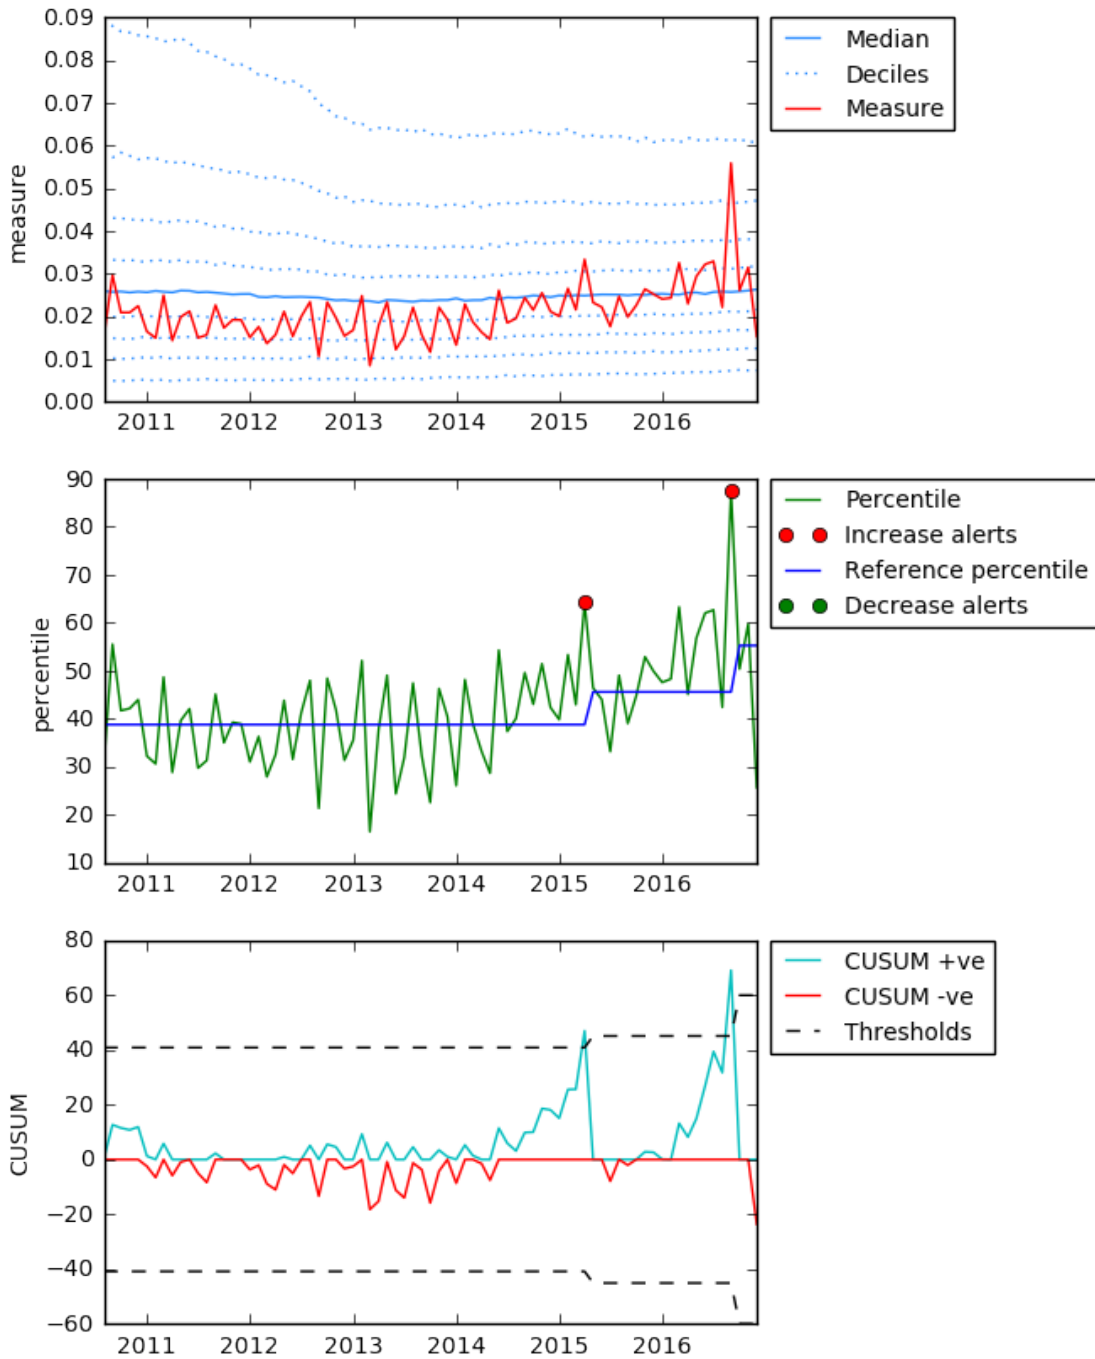

Measure: <https://openprescribing.net/ccg/05Y/#glaucoma>

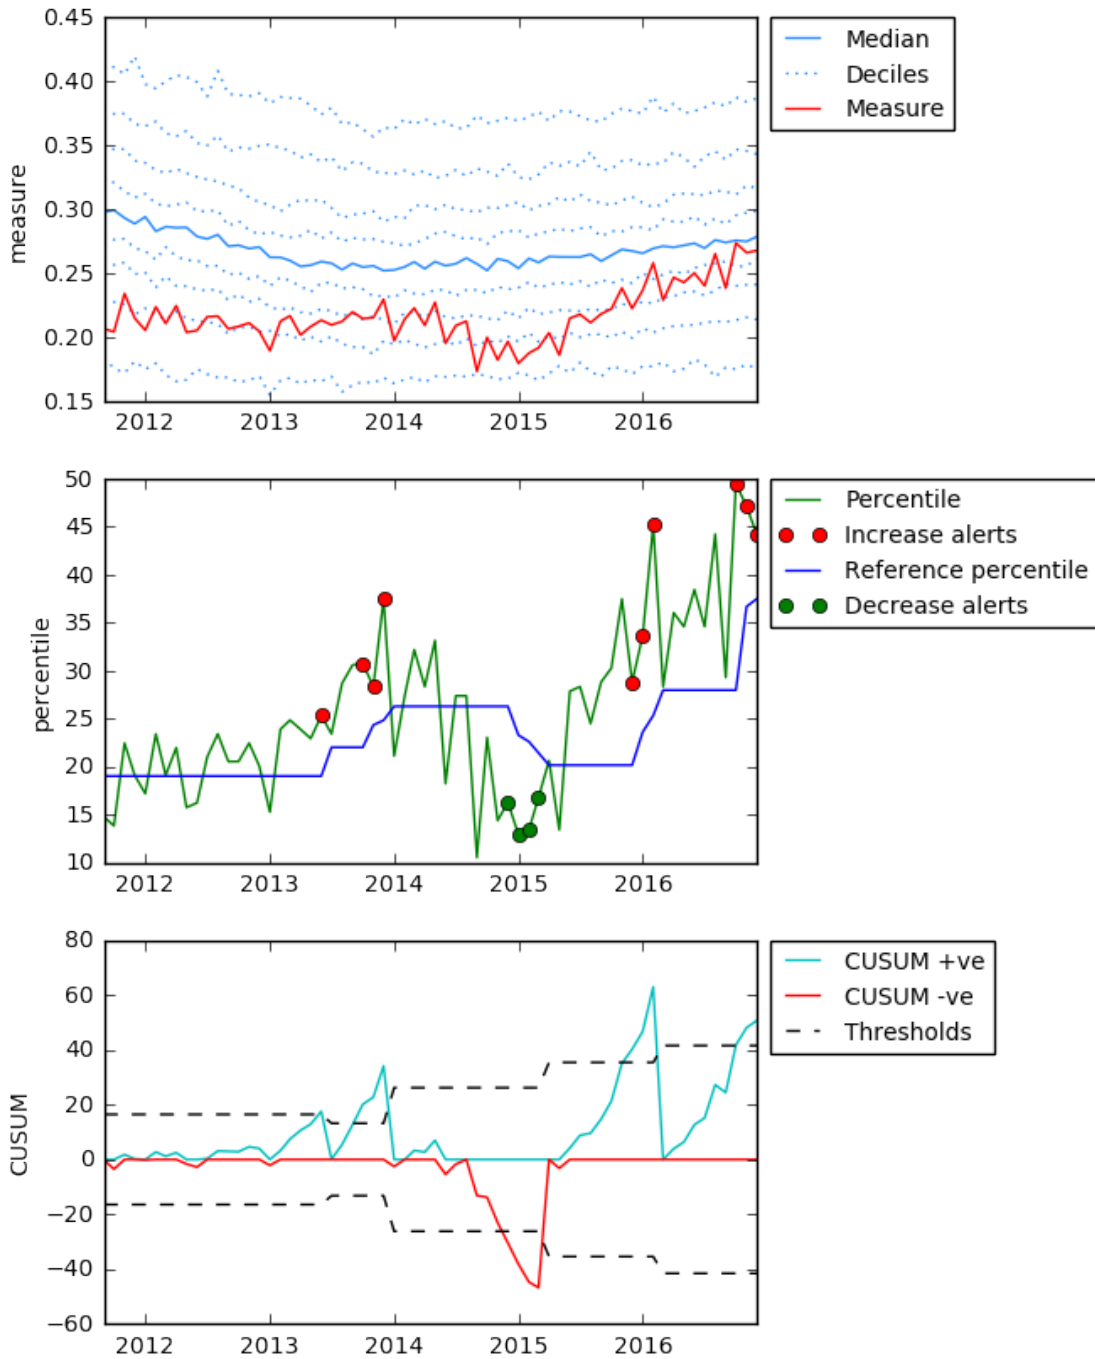

Measure: <https://openprescribing.net/practice/G85138/#glaucoma>

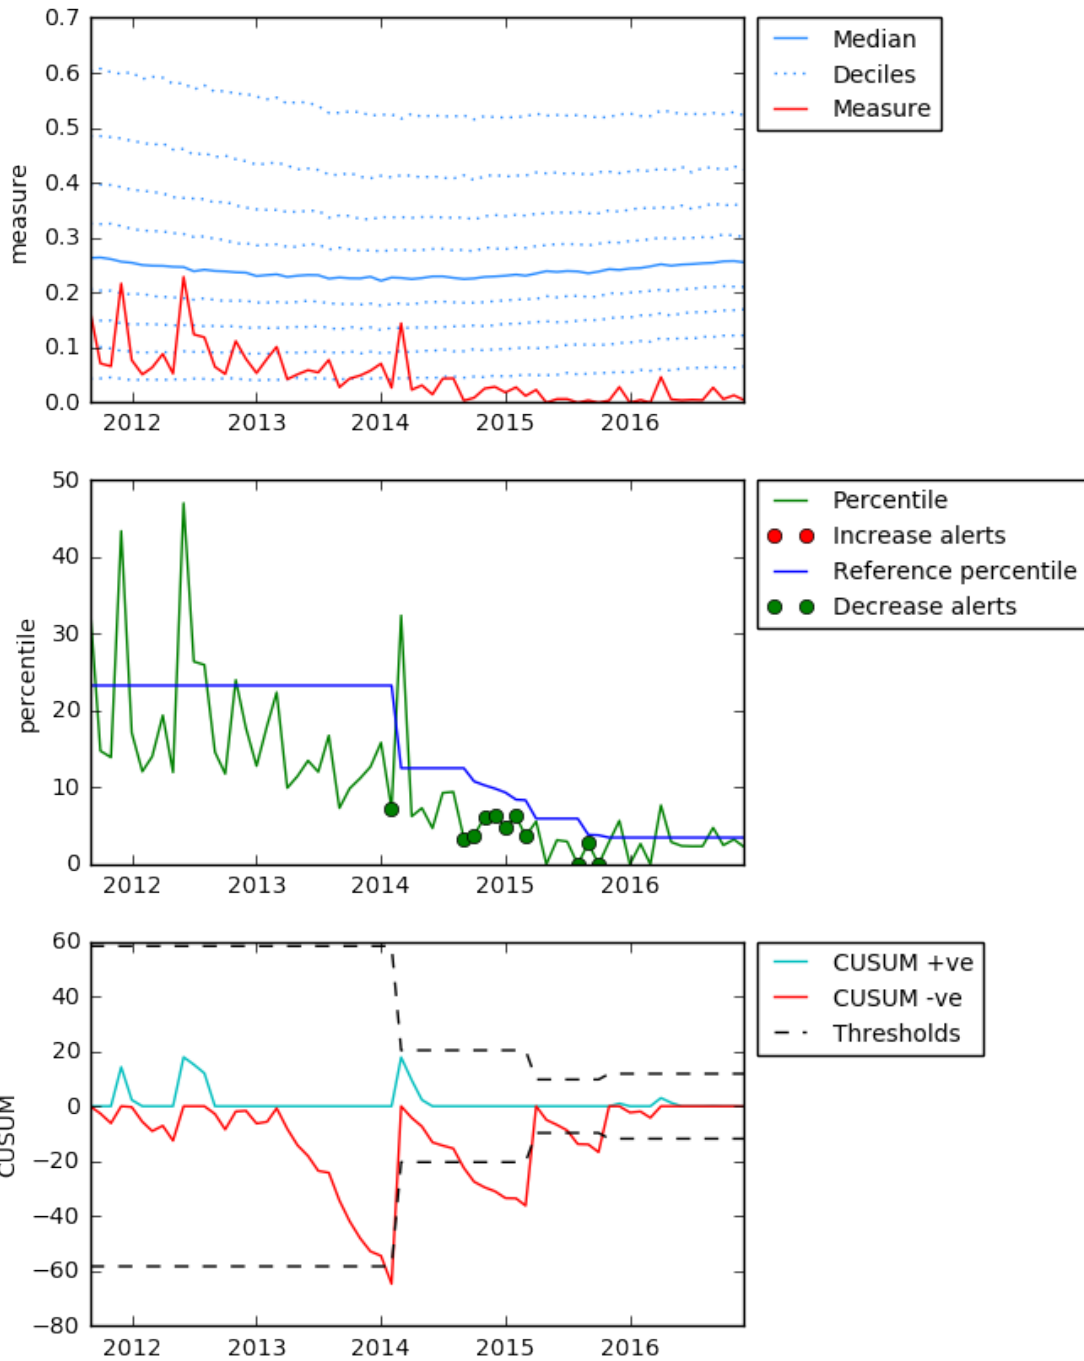

Measure: <https://openprescribing.net/ccg/05Y/#ppidose>

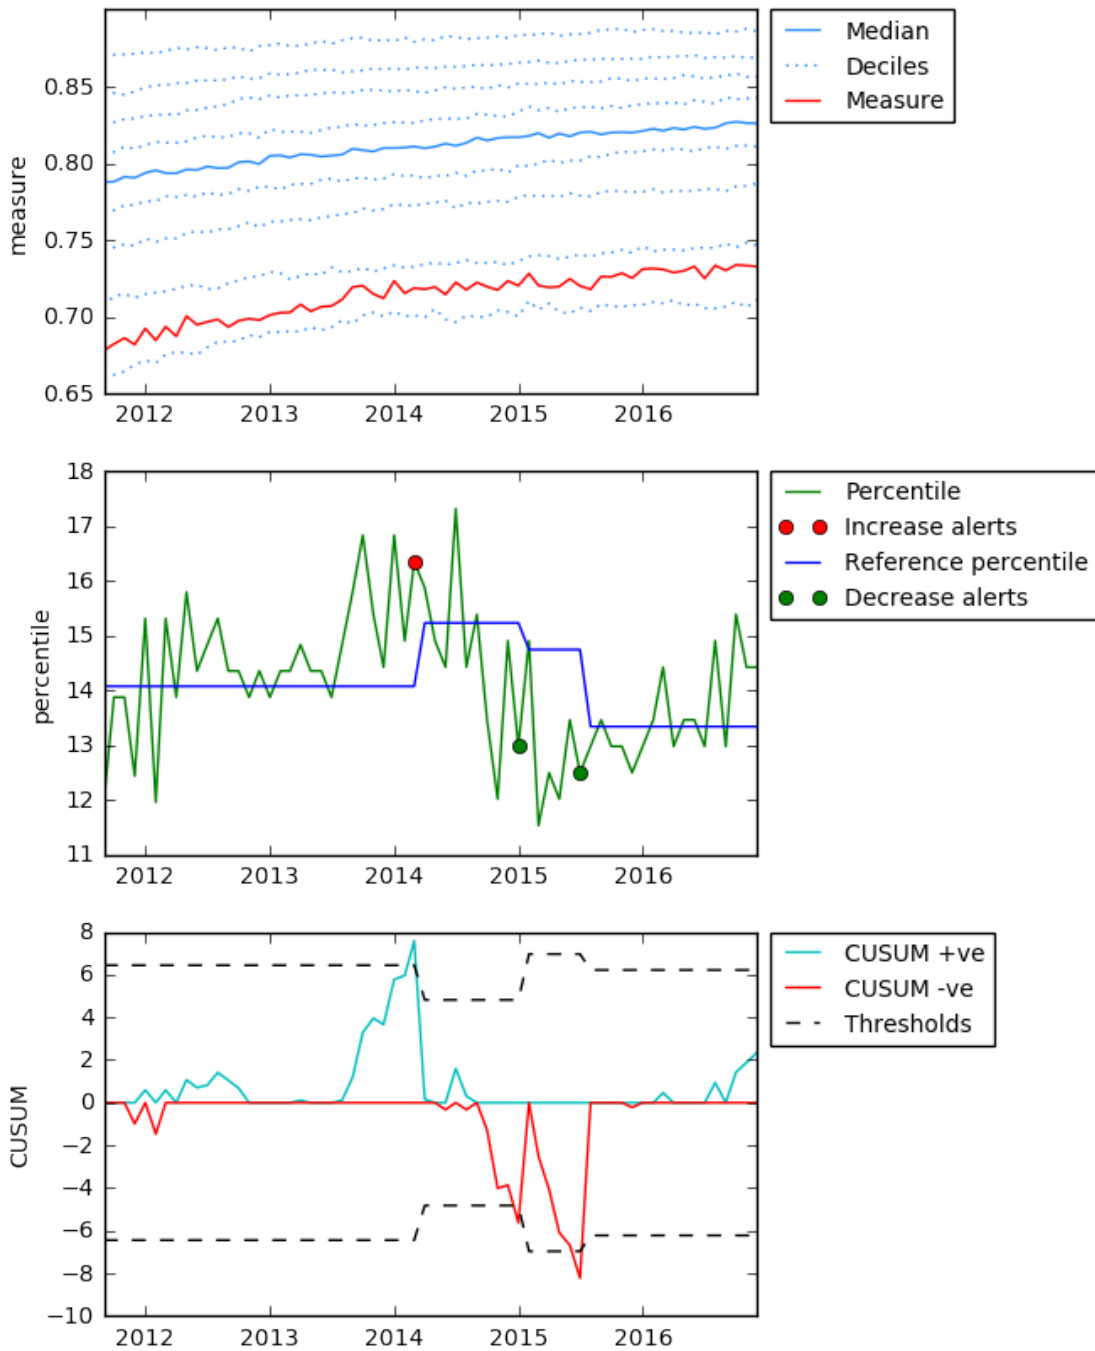

Measure: <https://openprescribing.net/practice/G85138/#ppidose>

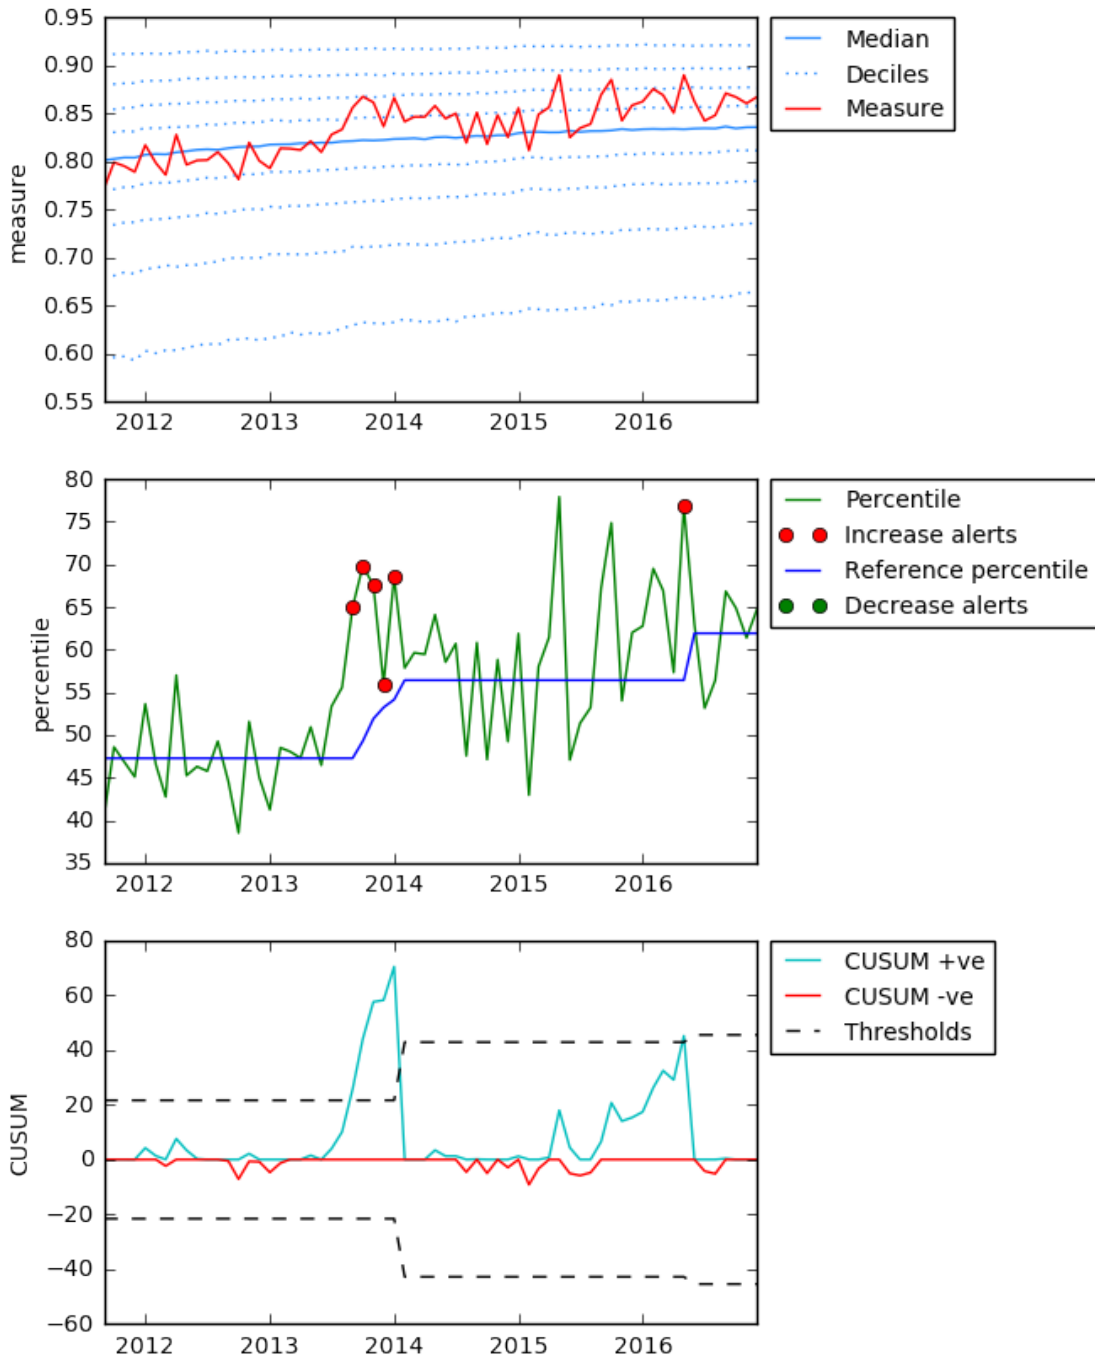



Measure: [https://openprescribing.net/ccg/05Y/#ktt9\\_cephalosporins](https://openprescribing.net/ccg/05Y/#ktt9_cephalosporins)

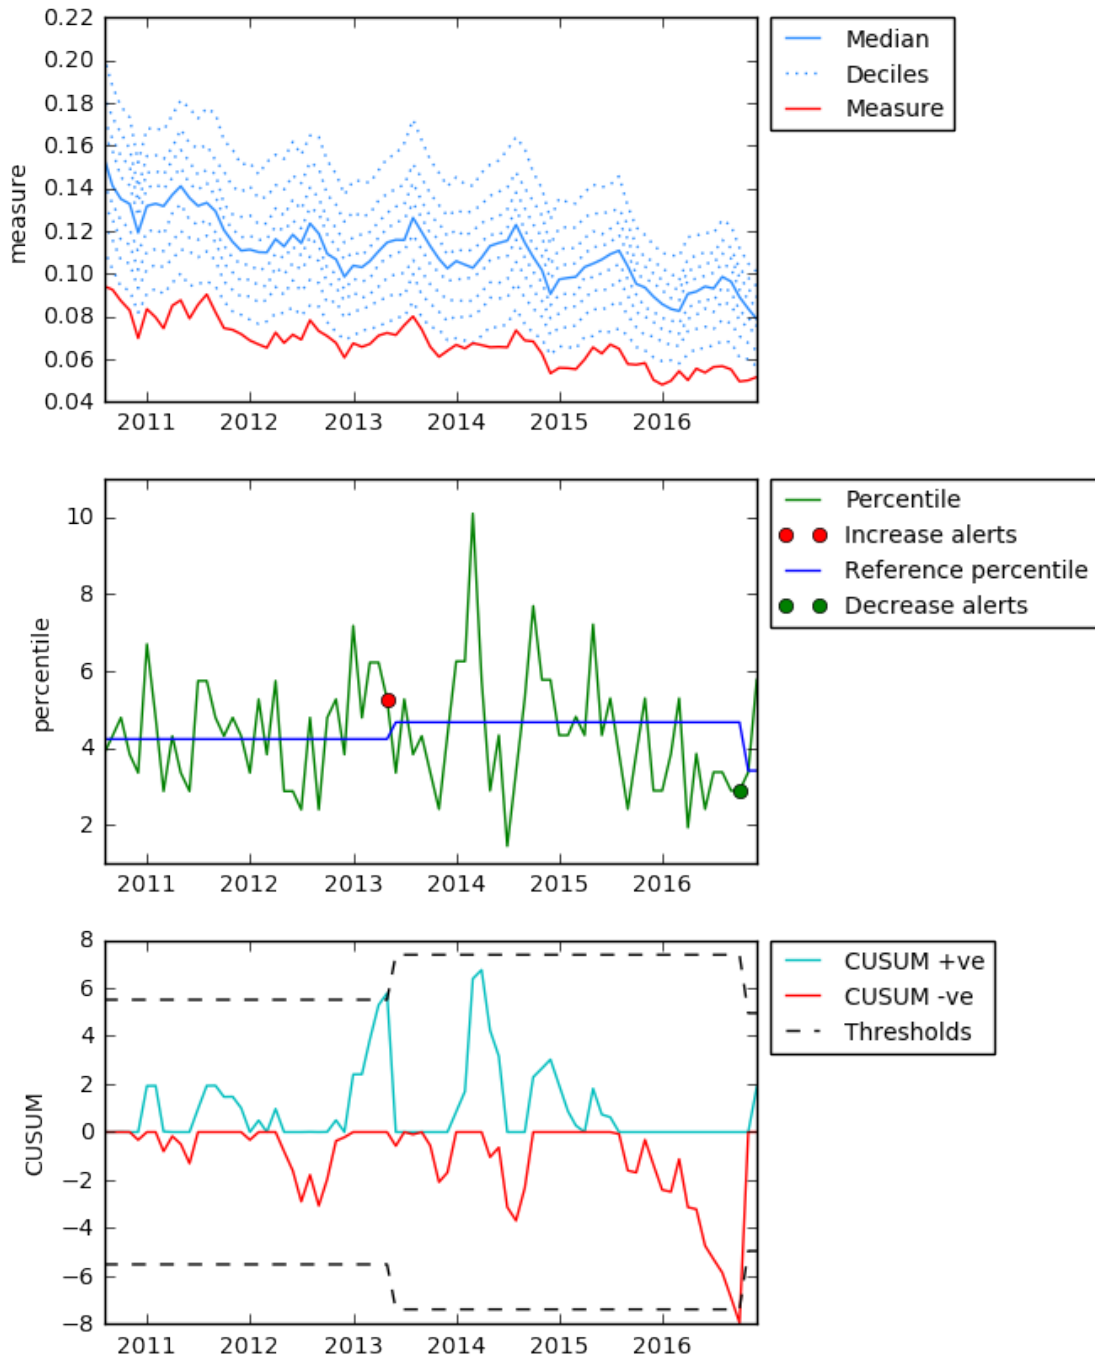

Measure: [https://openprescribing.net/practice/G85138/#ktt9\\_cephalosporins](https://openprescribing.net/practice/G85138/#ktt9_cephalosporins)

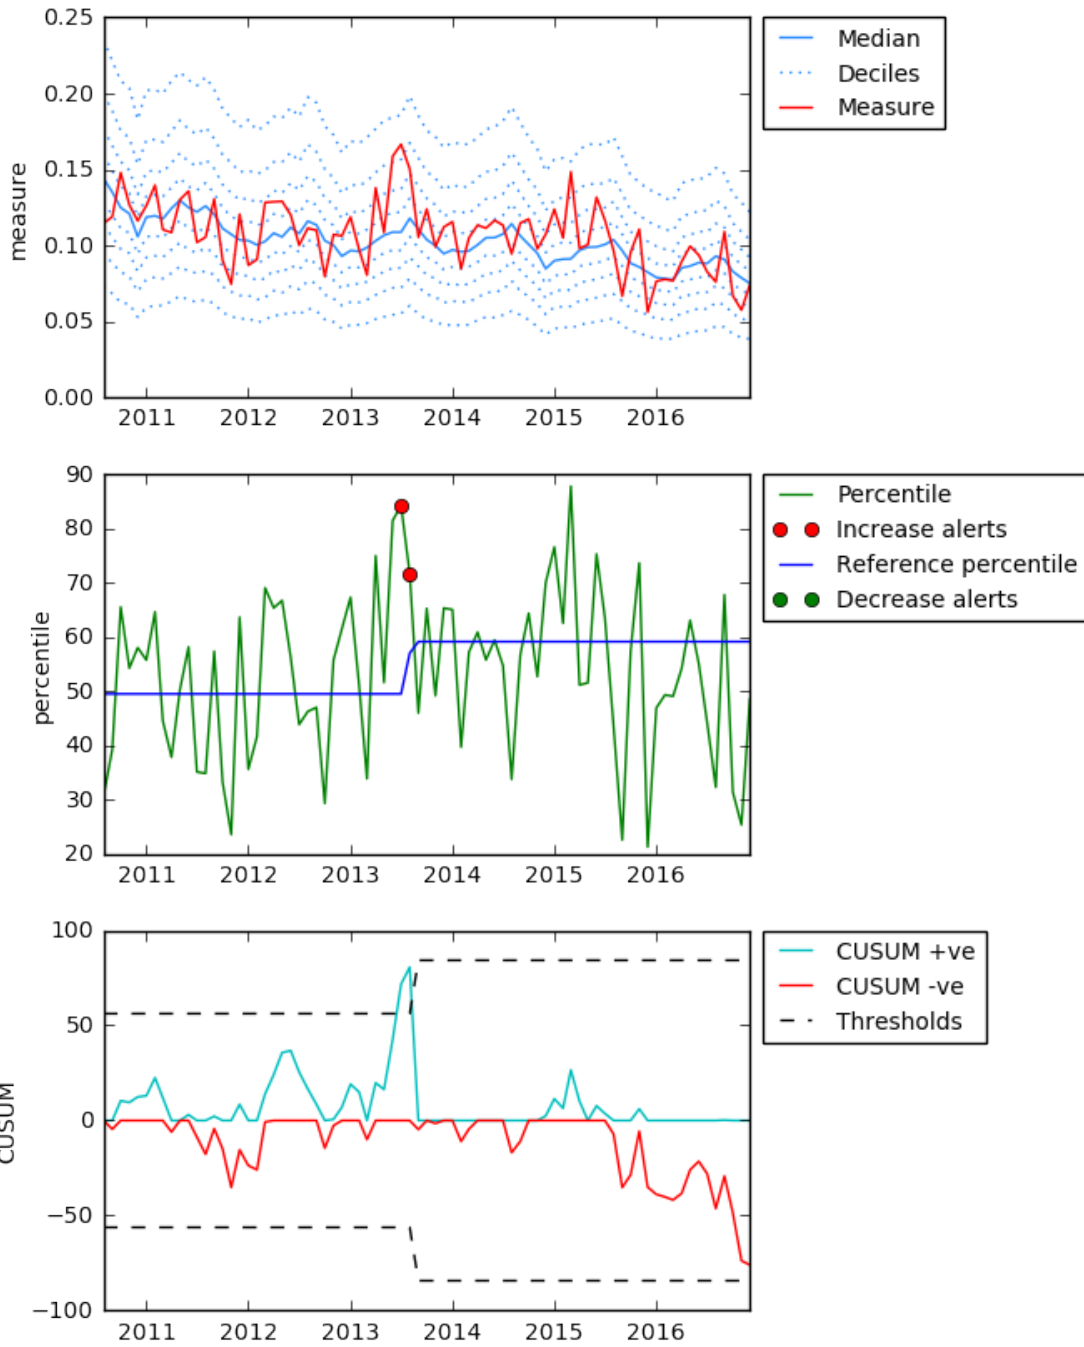

Measure: <https://openprescribing.net/ccg/05Y/#quetiapine>

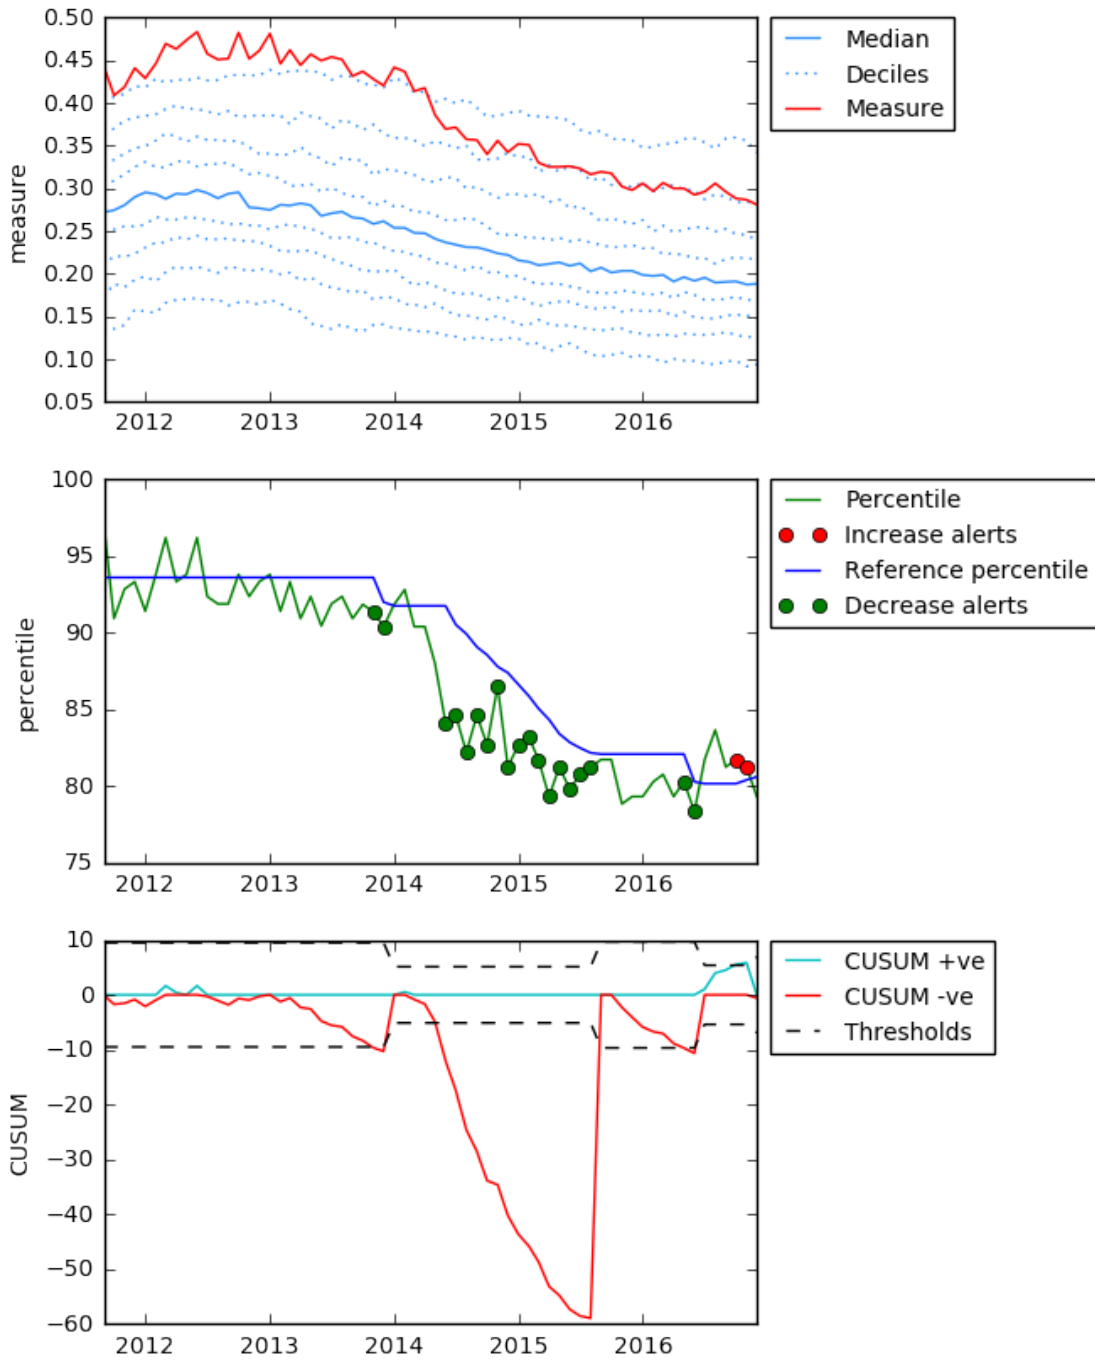

Measure: <https://openprescribing.net/practice/G85138/#quetiapine>

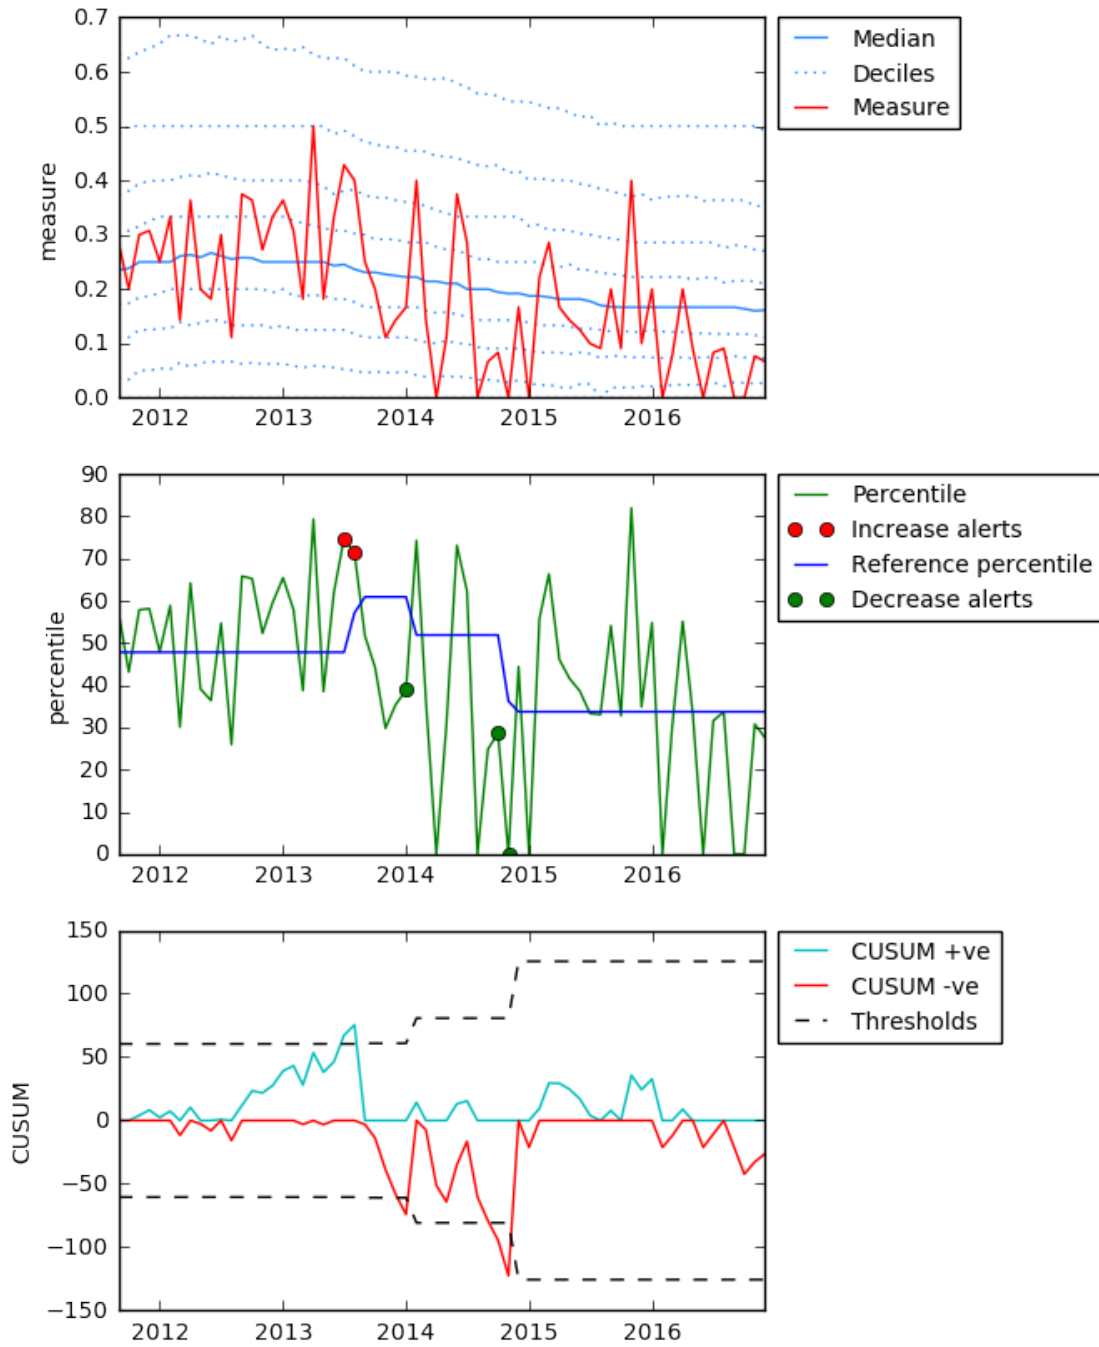

Measure: <https://openprescribing.net/ccg/05Y/#saba>

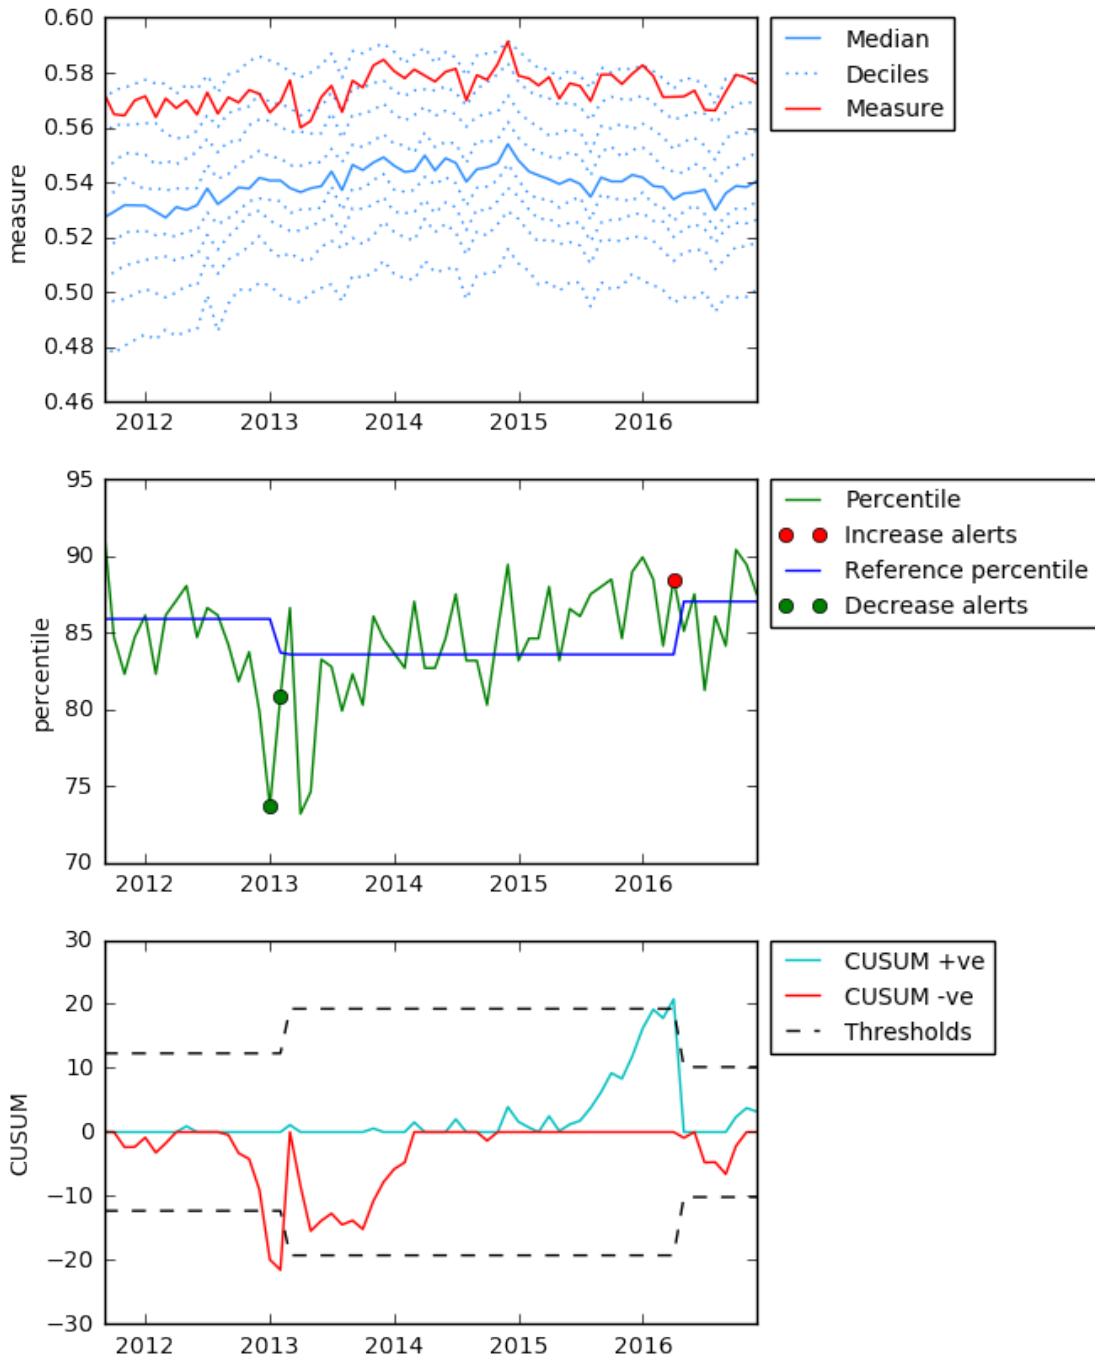

Measure: <https://openprescribing.net/practice/G85138/#saba>

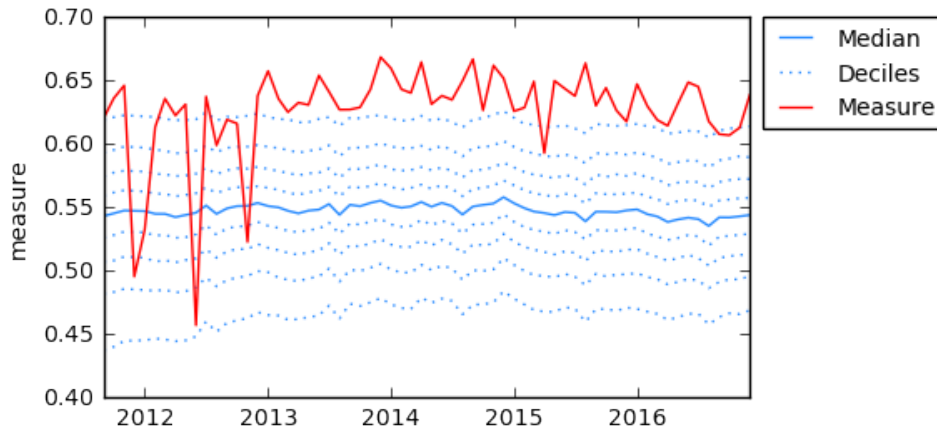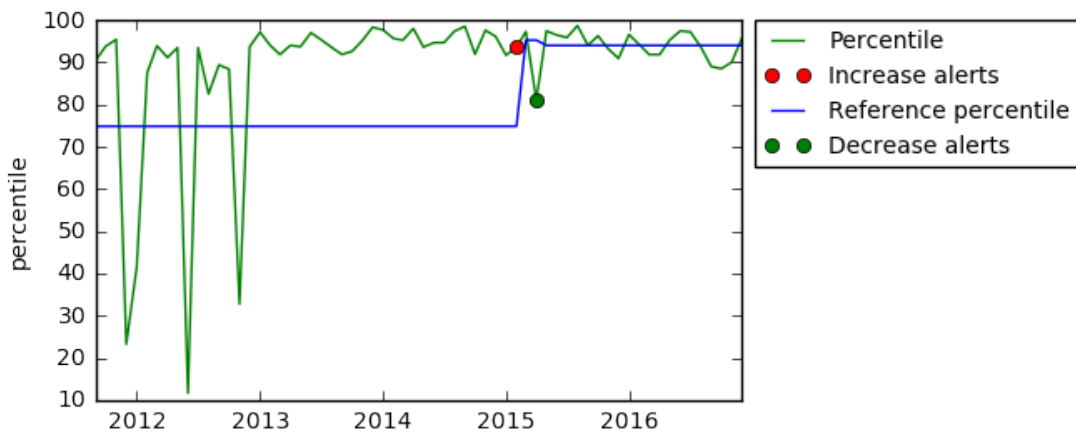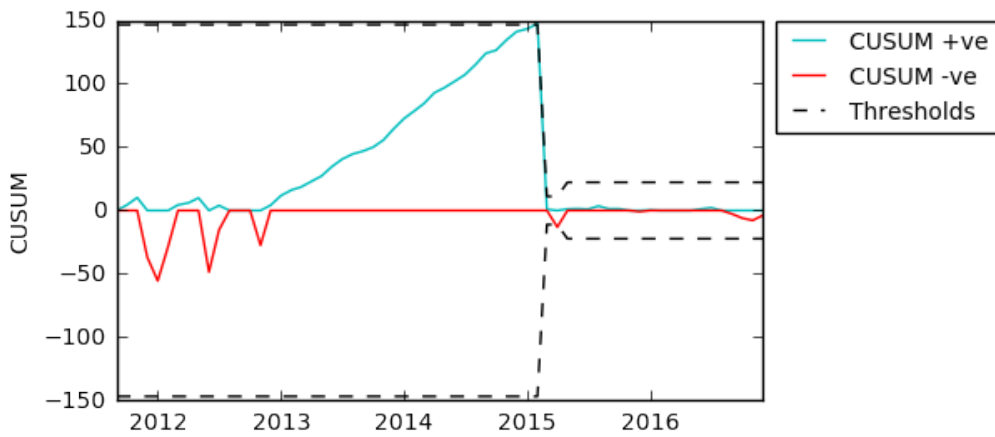

Measure: <https://openprescribing.net/ccg/05Y/#keppra>

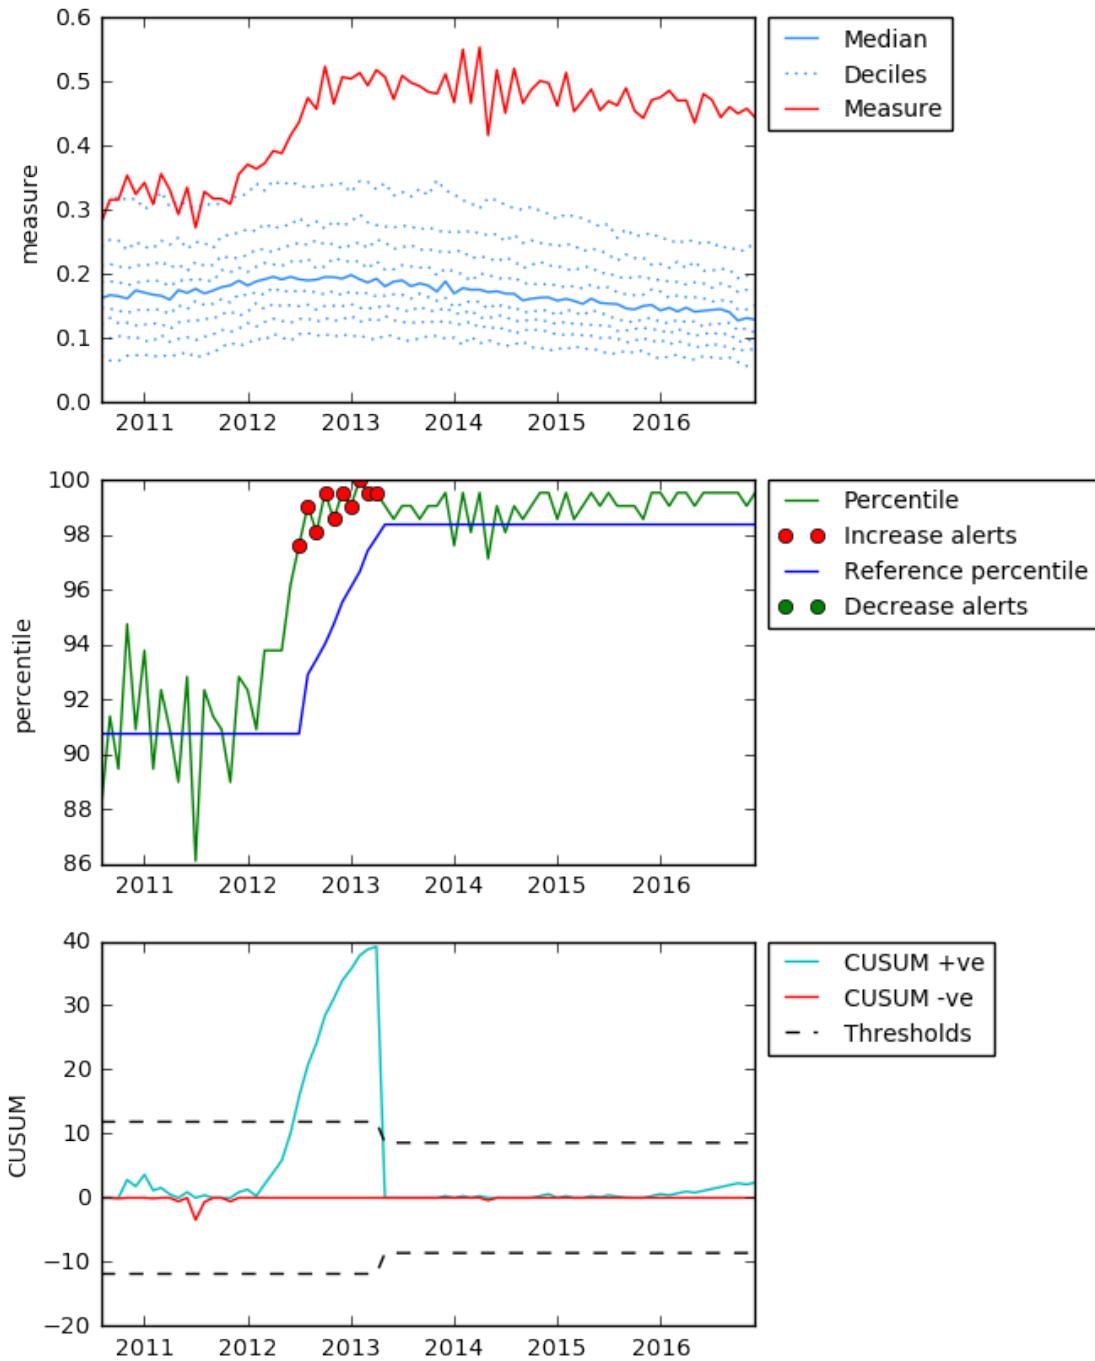

Measure: <https://openprescribing.net/practice/G85138/#keppra>

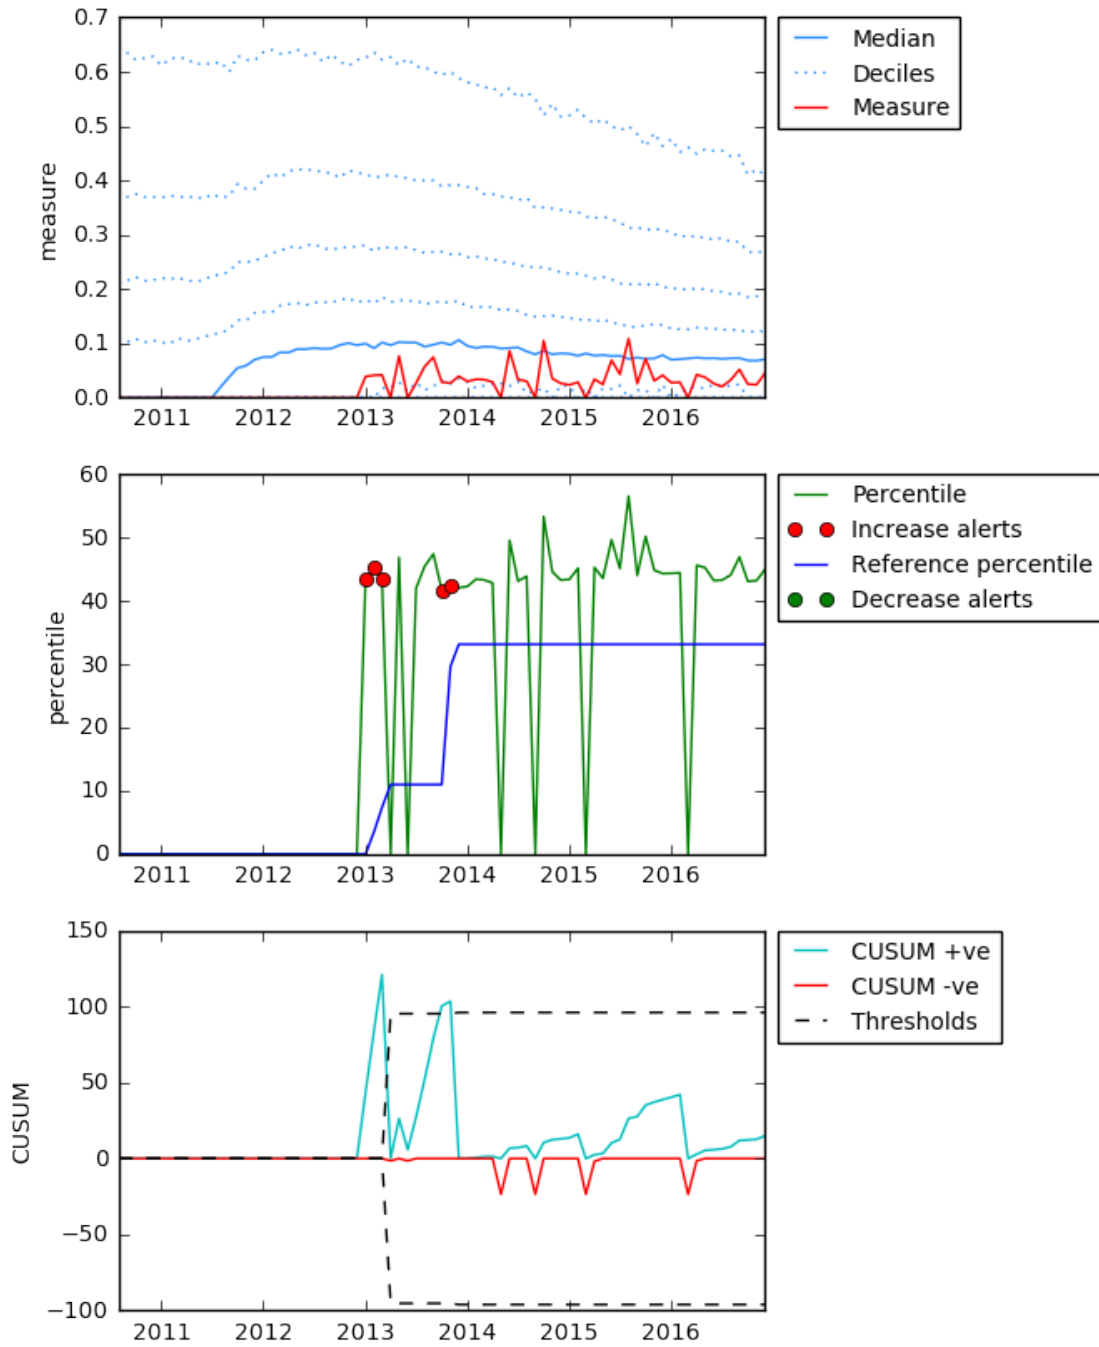



Measure: <https://openprescribing.net/ccg/05Y/#silver>

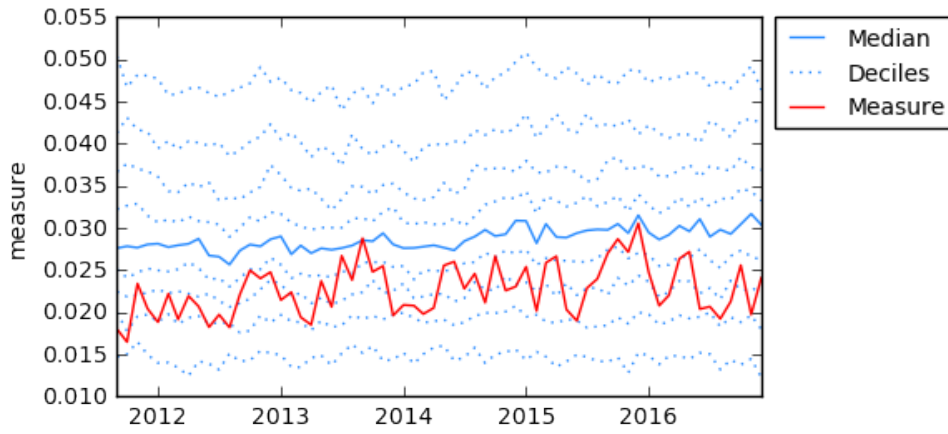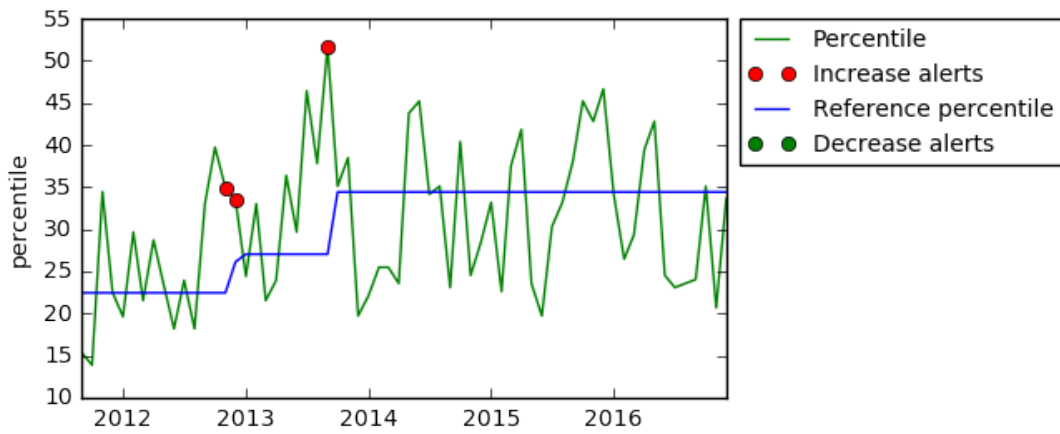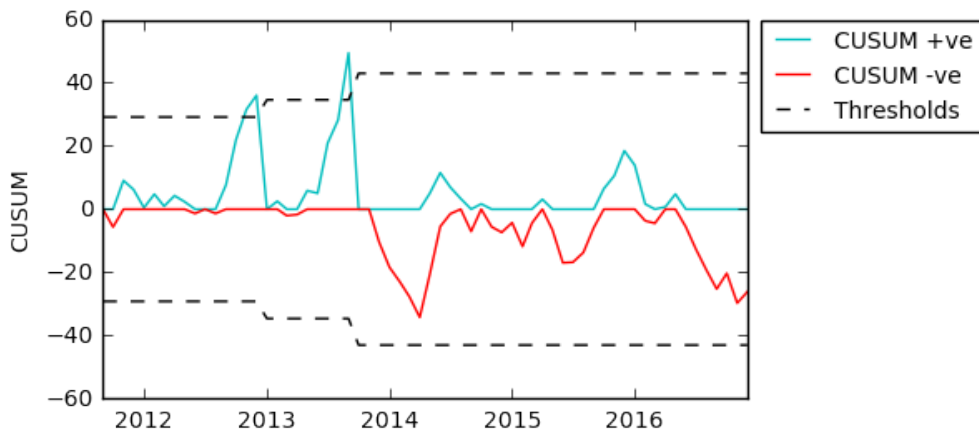

Measure: <https://openprescribing.net/practice/G85138/#silver>

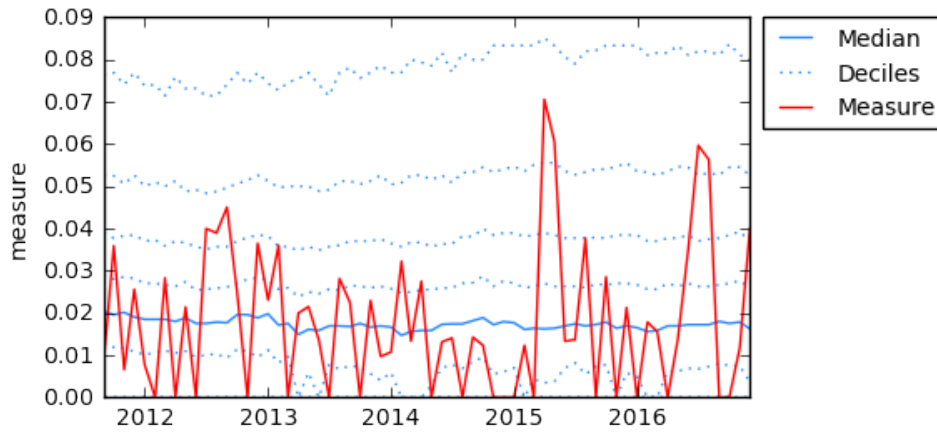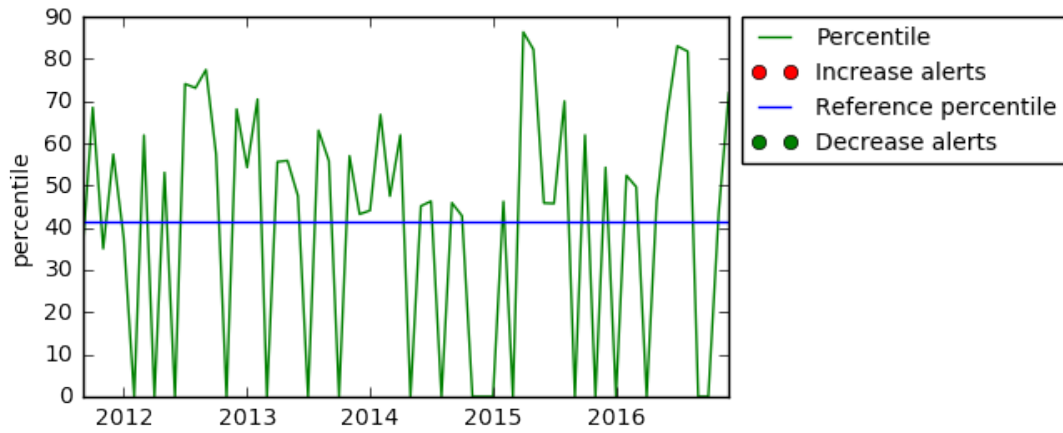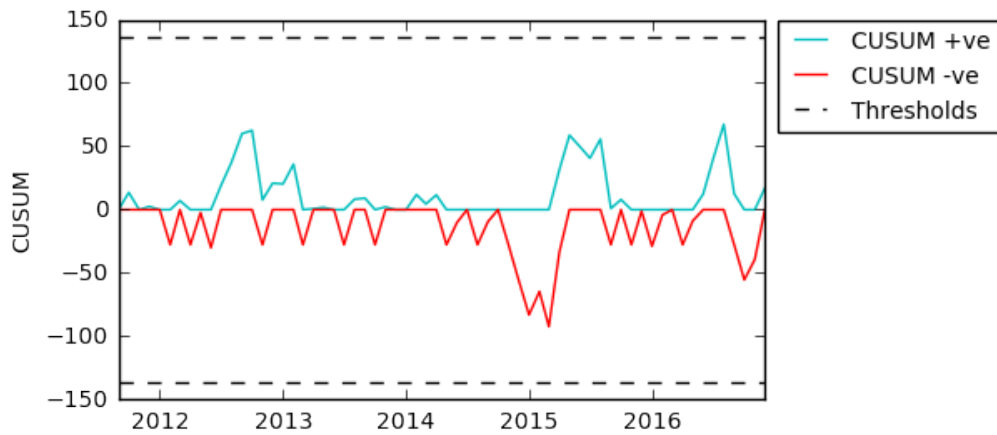

Supplement: MOESM1 [file 15927842]
